# Supplementary material for: Integrating Network Pharmacology and Experimental Validation to Elucidate the Mechanism of Yiqi Yangyin Decoction in Suppressing Non‐Small‐Cell Lung Cancer
Source: Hindawi journal article supplement (doi:10.1155/2023/4967544), 2023-01-01

**A****Module 1**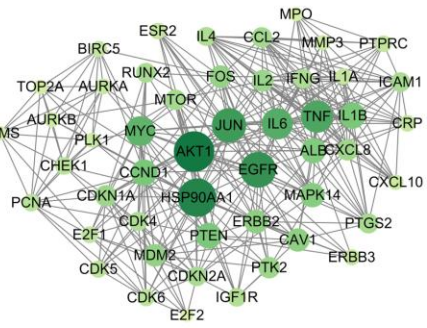**Module 2**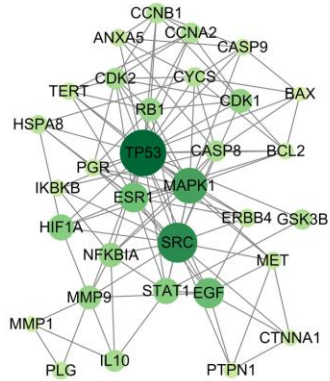**Module 3**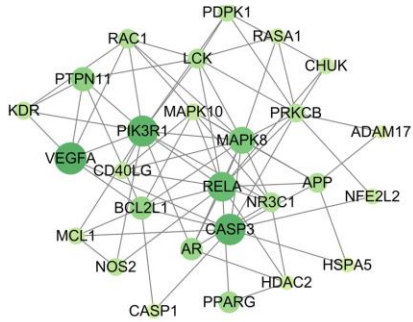**B****Module 1**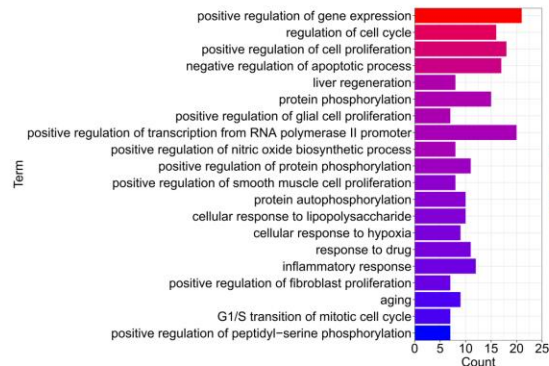**Module 2**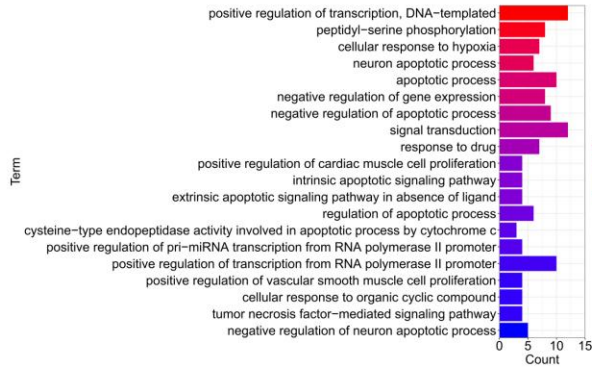**Module 3**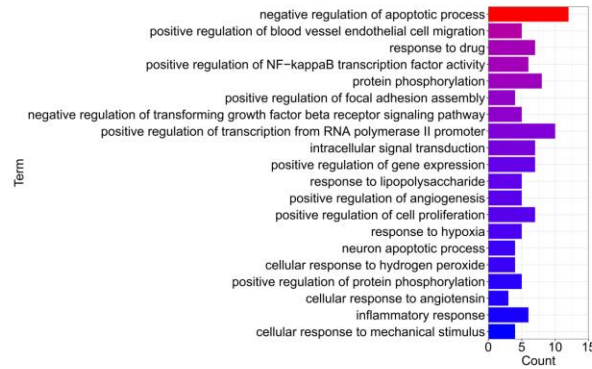**C****Module 1**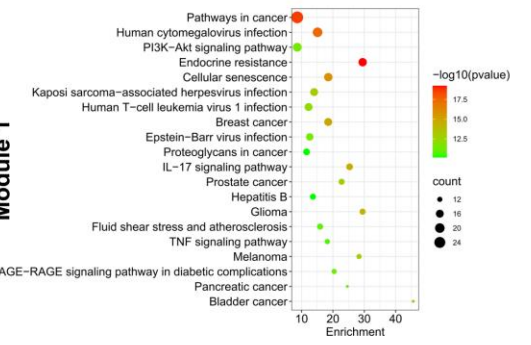**Module 2**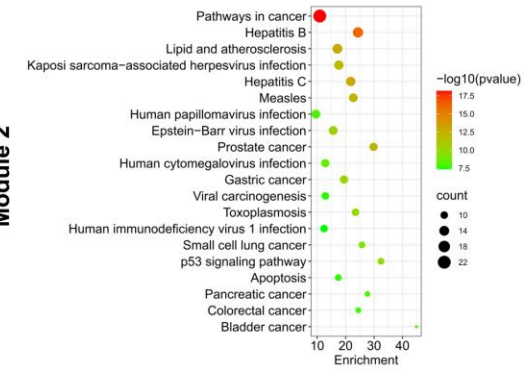**Module 3**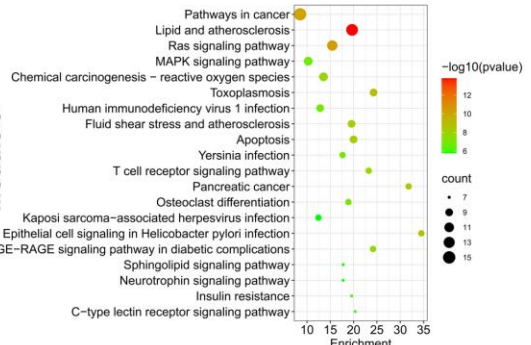

Supplement: f1 [file 4967544.f1.pdf]
