# Supplementary material for: Integrating Network Pharmacology and Experimental Validation to Elucidate the Mechanism of Yiqi Yangyin Decoction in Suppressing Non‐Small‐Cell Lung Cancer
Source: Hindawi journal article supplement (doi:10.1155/2023/4967544), 2023-01-01
Supplement: f2 [file 4967544.f2.pdf]

**Supplementay Table 1: Target genes of 40 bioactive components in YYD**

| <b>Number</b> | <b>Protein name</b>                                    | <b>Gene name</b> |
|---------------|--------------------------------------------------------|------------------|
| 1             | Progesterone receptor                                  | PGR              |
| 2             | Mineralocorticoid receptor                             | NR3C2            |
| 3             | Nuclear receptor coactivator 2                         | NCOA2            |
| 4             | Alcohol dehydrogenase 1C                               | ADH1C            |
| 5             | Ig gamma-1 chain C region                              | IGHG1            |
| 6             | Retinoic acid receptor RXR-alpha                       | RXRA             |
| 7             | Nuclear receptor coactivator 1                         | NCOA1            |
| 8             | Prostaglandin G/H synthase 1                           | PTGS1            |
| 9             | Prostaglandin G/H synthase 2                           | PTGS2            |
| 10            | Alpha-2A adrenergic receptor                           | ADRA2A           |
| 11            | Sodium-dependent noradrenaline transporter             | SLC6A2           |
| 12            | Sodium-dependent dopamine transporter                  | SLC6A3           |
| 13            | Beta-2 adrenergic receptor                             | ADRB2            |
| 14            | Aldose reductase                                       | AKR1B1           |
| 15            | Urokinase-type plasminogen activator                   | PLAU             |
| 16            | Leukotriene A-4 hydrolase                              | LTA4H            |
| 17            | Amine oxidase [flavin-containing] B                    | MAOB             |
| 18            | Amine oxidase [flavin-containing] A                    | MAOA             |
| 19            | mRNA of PKA Catalytic Subunit C-alpha                  | PRKACA           |
| 20            | Chymotrypsinogen B                                     | CTRB1            |
| 21            | Muscarinic acetylcholine receptor M3                   | CHRM3            |
| 22            | Muscarinic acetylcholine receptor M1                   | CHRM1            |
| 23            | Beta-1 adrenergic receptor                             | ADRB1            |
| 24            | Sodium channel protein type 5 subunit alpha            | SCN5A            |
| 25            | 5-hydroxytryptamine 2A receptor                        | HTR2A            |
| 26            | Alpha-1A adrenergic receptor                           | ADRA1A           |
| 27            | Gamma-aminobutyric-acid receptor alpha-3 subunit       | GABRA3           |
| 28            | Muscarinic acetylcholine receptor M2                   | CHRM2            |
| 29            | Alpha-1B adrenergic receptor                           | ADRA1B           |
| 30            | Gamma-aminobutyric acid receptor subunit alpha-1       | GABRA1           |
| 31            | Neuronal acetylcholine receptor protein, alpha-7 chain | CHRNA7           |
| 32            | Cytochrome P450 51 (by homology)                       | CYP51A1          |
| 33            | HMG-CoA reductase                                      | HMGCR            |
| 34            | LXR-alpha                                              | NR1H3            |
| 35            | Niemann-Pick C1-like protein 1                         | NPC1L1           |
| 36            | Cytochrome P450 17A1                                   | CYP17A1          |
| 37            | 3-oxo-5-alpha-steroid 4-dehydrogenase 2                | SRD5A2           |
| 38            | Estrogen receptor                                      | ESR1             |
| 39            | Androgen receptor                                      | AR               |
| 40            | 3-oxo-5-alpha-steroid 4-dehydrogenase 1                | SRD5A1           |
| 41            | Glucocorticoid receptor                                | NR3C1            |
| 42            | G-protein coupled bile acid receptor 1                 | GPBAR1           |
| 43            | M-phase inducer phosphatase 2                          | CDC25B           |
| 44            | 5-hydroxytryptamine receptor 1E                        | HTR1E            |

|                                                         |          |
|---------------------------------------------------------|----------|
| 45 Arachidonate 15-lipoxygenase                         | ALOX15   |
| 46 Estrogen receptor beta                               | ESR2     |
| 47 Aromatase                                            | CYP19A1  |
| 48 Kappa-type opioid receptor                           | OPRK1    |
| 49 Phospholipase A2                                     | PLA2G1B  |
| 50 Aldo-keto reductase family 1 member C2               | AKR1C2   |
| 51 MAP kinase-activated protein kinase 2                | MAPKAPK2 |
| 52 Bone morphogenetic protein 2                         | BMP2     |
| 53 Proto-oncogene serine/threonine-protein kinase Pim-1 | PIM1     |
| 54 Steryl-sulfatase                                     | STS      |
| 55 Serum albumin                                        | ALB      |
| 56 Apolipoprotein A-II                                  | APOA2    |
| 57 Thyroid hormone receptor beta                        | THRB     |
| 58 Caspase-7                                            | CASP7    |
| 59 Carbonic anhydrase 2                                 | CA2      |
| 60 Nuclear receptor ROR-alpha                           | RORA     |
| 61 Kinesin-like protein KIF11                           | KIF11    |
| 62 Estradiol 17-beta-dehydrogenase 11                   | HSD17B11 |
| 63 Vitamin D-binding protein                            | GC       |
| 64 Mitogen-activated protein kinase 1                   | MAPK1    |
| 65 Transthyretin                                        | TTR      |
| 66 SEC14-like protein 2                                 | SEC14L2  |
| 67 Collagenase 3                                        | MMP13    |
| 68 Estradiol 17-beta-dehydrogenase 1                    | HSD17B1  |
| 69 Integrin alpha-L                                     | ITGAL    |
| 70 Aldo-keto reductase family 1 member C3               | AKR1C3   |
| 71 Bile acid receptor                                   | NR1H4    |
| 72 Corticosteroid 11-beta-dehydrogenase isozyme 1       | HSD11B1  |
| 73 Cell division protein kinase 2                       | CDK2     |
| 74 Proto-oncogene tyrosine-protein kinase Src           | SRC      |
| 75 cAMP-specific 3,5-cyclic phosphodiesterase 4B        | PDE4B    |
| 76 ADAM 17                                              | ADAM17   |
| 77 Caspase-3                                            | CASP3    |
| 78 Coagulation factor X                                 | F10      |
| 79 Tyrosine-protein phosphatase non-receptor type 11    | PTPN11   |
| 80 Peroxisome proliferator-activated receptor gamma     | PPARG    |
| 81 Bile salt sulfotransferase                           | SULT2A1  |
| 82 Epidermal growth factor receptor                     | EGFR     |
| 83 Mitogen-activated protein kinase 8                   | MAPK8    |
| 84 Mitogen-activated protein kinase 14                  | MAPK14   |
| 85 Annexin A5                                           | ANXA5    |
| 86 Dihydroorotate dehydrogenase, mitochondrial          | DHODH    |
| 87 Glutathione reductase, mitochondrial                 | GSR      |
| 88 Peptidyl-prolyl cis-trans isomerase A                | PPIA     |
| 89 S-methyl-5-thioadenosine phosphorylase               | MTAP     |
| 90 Beta-secretase 1                                     | BACE1    |

|                                                                            |          |
|----------------------------------------------------------------------------|----------|
| 91 B-Raf proto-oncogene serine/threonine-protein kinase                    | BRAF     |
| 92 Serine/threonine-protein phosphatase 5                                  | PPP5C    |
| 93 Sex hormone-binding globulin                                            | SHBG     |
| 94 Nitric oxide synthase, endothelial                                      | NOS3     |
| 95 Vascular endothelial growth factor receptor 2                           | KDR      |
| 96 Dihydrofolate reductase                                                 | DHFR     |
| 97 Troponin C, slow skeletal and cardiac muscles                           | TNNC1    |
| 98 Heat shock protein HSP 90                                               | HSP90AA1 |
| 99 Phosphatidylinositol-4,5-bisphosphate 3-kinase catalytic subunit, gamma | PIK3CG   |
| 100 Potassium voltage-gated channel subfamily H member 2                   | KCNH2    |
| 101 Dopamine D1 receptor                                                   | DRD5     |
| 102 Gamma-aminobutyric-acid receptor alpha-2 subunit                       | GABRA2   |
| 103 Muscarinic acetylcholine receptor M4                                   | CHRM4    |
| 104 CGMP-inhibited 3',5'-cyclic phosphodiesterase A                        | PDE3A    |
| 105 Gamma-aminobutyric-acid receptor alpha-5 subunit                       | GABRA5   |
| 106 Neuronal acetylcholine receptor subunit alpha-2                        | CHRNA2   |
| 107 Sodium-dependent serotonin transporter                                 | SLC6A4   |
| 108 Mu-type opioid receptor                                                | OPRM1    |
| 109 Apoptosis regulator Bcl-2                                              | BCL2     |
| 110 Apoptosis regulator BAX                                                | BAX      |
| 111 Caspase-9                                                              | CASP9    |
| 112 Transcription factor AP-1                                              | JUN      |
| 113 Caspase-8                                                              | CASP8    |
| 114 Protein kinase C alpha type                                            | PRKCA    |
| 115 Transforming growth factor beta-1                                      | TGFB1    |
| 116 Serum paraoxonase/arylesterase 1                                       | PON1     |
| 117 Microtubule-associated protein 2                                       | MAP2     |
| 118 Acetylcholinesterase                                                   | ACHE     |
| 119 Receptor-interacting serine/threonine-protein kinase 2                 | RIPK2    |
| 120 Prothrombin                                                            | F2       |
| 121 Histone deacetylase 8                                                  | HDAC8    |
| 122 Wiskott-Aldrich syndrome protein                                       | WAS      |
| 123 Phenylethanolamine N-methyltransferase                                 | PNMT     |
| 124 3-phosphoinositide-dependent protein kinase 1                          | PDPK1    |
| 125 Liver carboxylesterase 1                                               | CES1     |
| 126 Serine/threonine-protein kinase Chk1                                   | CHEK1    |
| 127 Trafficking protein particle complex subunit 3                         | TRAPPC3  |
| 128 TGF-beta receptor type-1                                               | TGFBR1   |
| 129 Nitric oxide synthase, inducible                                       | NOS2     |
| 130 Dipeptidyl peptidase IV                                                | DPP4     |
| 131 Trypsin-1                                                              | PRSS1    |
| 132 DNA topoisomerase II                                                   | TOP2A    |
| 133 Coagulation factor VII                                                 | F7       |
| 134 Calmodulin                                                             | CAMKKA   |
| 135 Transcription factor p65                                               | RELA     |
| 136 Inhibitor of nuclear factor kappa-B kinase subunit beta                | IKBKB    |

|                                                                             |         |
|-----------------------------------------------------------------------------|---------|
| 137 RAC-alpha serine/threonine-protein kinase                               | AKT1    |
| 138 Tumor necrosis factor                                                   | TNF     |
| 139 Activator of 90 kDa heat shock protein ATPase homolog 1                 | AHSA1   |
| 140 Xanthine dehydrogenase/oxidase                                          | XDH     |
| 141 Interstitial collagenase                                                | MMP1    |
| 142 Signal transducer and activator of transcription 1-alpha/beta           | STAT1   |
| 143 Cell division control protein 2 homolog                                 | CDK1    |
| 144 Heme oxygenase 1                                                        | HMOX1   |
| 145 Cytochrome P450 3A4                                                     | CYP3A4  |
| 146 Cytochrome P450 1A2                                                     | CYP1A2  |
| 147 Cytochrome P450 1A1                                                     | CYP1A1  |
| 148 Intercellular adhesion molecule 1                                       | ICAM1   |
| 149 E-selectin                                                              | SELE    |
| 150 Vascular cell adhesion protein 1                                        | VCAM1   |
| 151 Nuclear receptor subfamily 1 group I member 2                           | NR1I2   |
| 152 Cytochrome P450 1B1                                                     | CYP1B1  |
| 153 Arachidonate 5-lipoxygenase                                             | ALOX5   |
| 154 Hyaluronan synthase 2                                                   | HAS2    |
| 155 Glutathione S-transferase P                                             | GSTP1   |
| 156 Aryl hydrocarbon receptor                                               | AHR     |
| 157 26S proteasome non-ATPase regulatory subunit 3                          | PSMD3   |
| 158 Solute carrier family 2, facilitated glucose transporter member 4       | SLC2A4  |
| 159 Nuclear receptor subfamily 1 group I member 3                           | NR1I3   |
| 160 Insulin receptor                                                        | INSR    |
| 161 Type I iodothyronine deiodinase                                         | DIO1    |
| 162 Serine/threonine-protein phosphatase 2B catalytic subunit alpha isoform | PPP3CA  |
| 163 Glutathione S-transferase Mu 1                                          | GSTM1   |
| 164 Glutathione S-transferase Mu 2                                          | GSTM2   |
| 165 Antileukoproteinase                                                     | SLPI    |
| 166 NADPH oxidase 4                                                         | NOX4    |
| 167 Tyrosinase                                                              | TYR     |
| 168 Tyrosine-protein kinase receptor FLT3                                   | FLT3    |
| 169 Carbonic anhydrase VII                                                  | CA7     |
| 170 Estradiol 17-beta-dehydrogenase 2                                       | HSD17B2 |
| 171 Multidrug resistance-associated protein 1                               | ABCC1   |
| 172 Carbonic anhydrase XII                                                  | CA12    |
| 173 Estrogen-related receptor alpha                                         | ESRRA   |
| 174 P-glycoprotein 1                                                        | ABCB1   |
| 175 ATP-binding cassette sub-family G member 2                              | ABCG2   |
| 176 Adenosine A1 receptor (by homology)                                     | ADORA1  |
| 177 Carbonic anhydrase IV                                                   | CA4     |
| 178 Glyoxalase I                                                            | GLO1    |
| 179 Tyrosine-protein kinase SYK                                             | SYK     |
| 180 Glycogen synthase kinase-3 beta                                         | GSK3B   |
| 181 Matrix metalloproteinase 9                                              | MMP9    |
| 182 Matrix metalloproteinase 2                                              | MMP2    |

|                                                                       |          |
|-----------------------------------------------------------------------|----------|
| 183 Arachidonate 12-lipoxygenase                                      | ALOX12   |
| 184 Receptor-type tyrosine-protein phosphatase S                      | PTPRS    |
| 185 Adenosine A2a receptor (by homology)                              | ADORA2A  |
| 186 Cyclin-dependent kinase 5                                         | CDK5     |
| 187 CDK5 activator 1                                                  | CDK5R1   |
| 188 cyclin B3                                                         | CCNB3    |
| 189 cyclin B1                                                         | CCNB1    |
| 190 cyclin B2                                                         | CCNB2    |
| 191 Arginase-1 (by homology)                                          | ARG1     |
| 192 G-protein coupled receptor 35                                     | GPR35    |
| 193 Death-associated protein kinase 1                                 | DAPK1    |
| 194 DNA-3-methyladenine glycosylase                                   | MPG      |
| 195 Solute carrier family 22 member 12                                | SLC22A12 |
| 196 Receptor-type tyrosine-protein phosphatase C                      | PTPRC    |
| 197 Tyrosine-protein phosphatase non-receptor type 22                 | PTPN22   |
| 198 Induced myeloid leukemia cell differentiation protein Mcl-1       | MCL1     |
| 199 Dual specificity protein phosphatase 3                            | DUSP3    |
| 200 Carbonic anhydrase 5A, mitochondrial                              | CA5A     |
| 201 Macrophage migration inhibitory factor                            | MIF      |
| 202 Polyphenol oxidase 2                                              | PPO2     |
| 203 Cocaine esterase                                                  | CES2     |
| 204 Bcl-2-related protein A1                                          | BCL2A1   |
| 205 Ribosomal protein S6 kinase alpha-3                               | RPS6KA3  |
| 206 Carbonic anhydrase 13                                             | CA13     |
| 207 Telomerase reverse transcriptase                                  | TERT     |
| 208 Carbonic anhydrase 5B, mitochondrial                              | CA5B     |
| 209 Carbonic anhydrase 6                                              | CA6      |
| 210 Alkaline phosphatase, tissue-nonspecific isozyme                  | ALPL     |
| 211 Toll-like receptor 9                                              | TLR9     |
| 212 Testosterone 17-beta-dehydrogenase 3                              | HSD17B3  |
| 213 Carbonic anhydrase 9                                              | CA9      |
| 214 DNA (cytosine-5)-methyltransferase 1                              | DNMT1    |
| 215 Carbonic anhydrase 14                                             | CA14     |
| 216 Tubulin beta-2B chain                                             | TUBB2B   |
| 217 Carboxy-terminal domain RNA polymerase II polypeptide A small pho | CTDSP1   |
| 218 Tubulin alpha-1A chain                                            | TUBA1A   |
| 219 Tyrosine-protein phosphatase non-receptor type 1                  | PTPN1    |
| 220 Glycogen synthase kinase-3 alpha                                  | GSK3A    |
| 221 High affinity cAMP-specific 3',5'-cyclic phosphodiesterase 7A     | PDE7A    |
| 222 Hepatocyte nuclear factor 4-alpha                                 | HNF4A    |
| 223 Ras-related C3 botulinum toxin substrate 1                        | RAC1     |
| 224 Mitogen-activated protein kinase 10                               | MAPK10   |
| 225 Cytochrome P450 2C9                                               | CYP2C9   |
| 226 Protein kinase C epsilon type                                     | PRKCE    |
| 227 Glutamate receptor ionotropic, NMDA 2B                            | GRIN2B   |
| 228 Thyroid hormone receptor alpha                                    | THRA     |

|                                                                                |        |
|--------------------------------------------------------------------------------|--------|
| 229 Hydroxycarboxylic acid receptor 2                                          | HCAR2  |
| 230 Amyloid beta A4 protein                                                    | APP    |
| 231 Tyrosine-protein kinase HCK                                                | HCK    |
| 232 Cholinesterase                                                             | BCHE   |
| 233 Glucosylceramidase                                                         | GBA    |
| 234 Cell division protein kinase 6                                             | CDK6   |
| 235 Angiogenin                                                                 | ANG    |
| 236 Branched-chain-amino-acid aminotransferase, mitochondrial                  | BCAT2  |
| 237 Heat shock cognate 71 kDa protein                                          | HSPA8  |
| 238 Complement factor B                                                        | CFB    |
| 239 Oxysterols receptor LXR-beta                                               | NR1H2  |
| 240 NAD(P)H dehydrogenase [quinone] 1                                          | NQO1   |
| 241 Carbonic anhydrase 1                                                       | CA1    |
| 242 Complement C1r subcomponent                                                | C1R    |
| 243 Serine/threonine-protein kinase 6                                          | AURKA  |
| 244 Retinoic acid receptor beta                                                | RARB   |
| 245 Retinoic acid receptor gamma                                               | RARG   |
| 246 Retinoic acid receptor RXR-beta                                            | RXRB   |
| 247 Retinoic acid receptor RXR-gamma                                           | RXRG   |
| 248 Retinoic acid receptor alpha                                               | RARA   |
| 249 Protein kinase C gamma type                                                | PRKCG  |
| 250 Potassium voltage-gated channel subfamily A member 3                       | KCNA3  |
| 251 Peptidyl-prolyl cis-trans isomerase FKBP1A                                 | FKBP1A |
| 252 Stromelysin-1                                                              | MMP3   |
| 253 cAMP-specific 3,5-cyclic phosphodiesterase 4D                              | PDE4D  |
| 254 Cyclin-A2                                                                  | CCNA2  |
| 255 Flavin reductase                                                           | BLVRB  |
| 256 Ribosyldihyronicotinamide dehydrogenase [quinone]                          | NQO2   |
| 257 Ephrin type-B receptor 4                                                   | EPHB4  |
| 258 E3 ubiquitin-protein ligase Mdm2                                           | MDM2   |
| 259 Alpha-tocopherol transfer protein                                          | TTPA   |
| 260 Aldo-keto reductase family 1 member C1                                     | AKR1C1 |
| 261 Receptor tyrosine-protein kinase erbB-4                                    | ERBB4  |
| 262 Dual specificity protein phosphatase 6                                     | DUSP6  |
| 263 Cathepsin K                                                                | CTSK   |
| 264 Peroxisome proliferator-activated receptor delta                           | PPARD  |
| 265 Proto-oncogene tyrosine-protein kinase LCK                                 | LCK    |
| 266 Poly [ADP-ribose] polymerase 1                                             | PARP1  |
| 267 Protein farnesyltransferase/geranylgeranyltransferase type-1 subunit alpha | FNTA   |
| 268 Methionine aminopeptidase 2                                                | METAP2 |
| 269 Purine nucleoside phosphorylase                                            | PNP    |
| 270 Serine/threonine-protein kinase PLK1                                       | PLK1   |
| 271 Adenosine kinase                                                           | ADK    |
| 272 Insulin-like growth factor 1 receptor                                      | IGF1R  |
| 273 Fatty acid-binding protein, adipocyte                                      | FABP4  |
| 274 Complement factor D                                                        | CFD    |

|                                                                          |          |
|--------------------------------------------------------------------------|----------|
| 275 Estrogen-related receptor gamma                                      | ESRRG    |
| 276 Thymidylate synthase                                                 | TYMS     |
| 277 Glutathione S-transferase A1                                         | GSTA1    |
| 278 Alcohol dehydrogenase 1B                                             | ADH1B    |
| 279 Alcohol dehydrogenase class-3                                        | ADH5     |
| 280 Fatty acid-binding protein, heart                                    | FABP3    |
| 281 Prolyl endopeptidase                                                 | PREP     |
| 282 CHRNA7-FAM7A fusion protein                                          | CHRFAM7A |
| 283 Trace amine-associated receptor 1                                    | TAAR1    |
| 284 Smoothed homolog                                                     | SMO      |
| 285 COUP transcription factor 2                                          | NR2F2    |
| 286 Neuronal acetylcholine receptor subunit alpha-4                      | CHRNA4   |
| 287 Voltage-dependent N-type calcium channel subunit alpha-1B            | CACNA1B  |
| 288 Interleukin-1 receptor-associated kinase 4                           | IRAK4    |
| 289 Histamine H3 receptor                                                | HRH3     |
| 290 Putative ATP-dependent Clp protease proteolytic subunit, mitochondri | CLPP     |
| 291 Muscarinic acetylcholine receptor M5                                 | CHRM5    |
| 292 Perilipin-1                                                          | PLIN1    |
| 293 P-selectin                                                           | SELP     |
| 294 Probable ATP-dependent RNA helicase DDX6                             | DDX6     |
| 295 Triggering receptor expressed on myeloid cells 1                     | TREM1    |
| 296 Cathepsin D                                                          | CTSD     |
| 297 Alpha-amylase 1                                                      | AMY1A    |
| 298 Tryptase beta-2                                                      | TPSB2    |
| 299 Chymase                                                              | CMA1     |
| 300 SPARC                                                                | SPARC    |
| 301 Seprase                                                              | FAP      |
| 302 Glutaminyl-peptide cyclotransferase                                  | QPCT     |
| 303 Neutrophil gelatinase-associated lipocalin                           | LCN2     |
| 304 Lanosterol synthase                                                  | LSS      |
| 305 Cathepsin S                                                          | CTSS     |
| 306 Suppressor of tumorigenicity protein 14                              | ST14     |
| 307 Galectin-7                                                           | LGALS7   |
| 308 Carnitine O-acetyltransferase                                        | CRAT     |
| 309 Serum amyloid P-component                                            | APCS     |
| 310 Phenylalanine-4-hydroxylase                                          | PAH      |
| 311 C-1-tetrahydrofolate synthase, cytoplasmic                           | MTHFD1   |
| 312 C-X-C chemokine receptor type 2                                      | CXCR2    |
| 313 C-X-C chemokine receptor type 1                                      | CXCR1    |
| 314 Glutamate carboxypeptidase 2                                         | FOLH1    |
| 315 Dual specificity mitogen-activated protein kinase kinase 1           | MAP2K1   |
| 316 Glycogen phosphorylase, liver form                                   | PYGL     |
| 317 Prostaglandin E synthase                                             | PTGES    |
| 318 Transient receptor potential cation channel subfamily V member 1     | TRPV1    |
| 319 Cytochrome P450 2C19                                                 | CYP2C19  |
| 320 Tyrosine-protein kinase Fyn                                          | FYN      |

|                                                                         |          |
|-------------------------------------------------------------------------|----------|
| 321 Monoglyceride lipase                                                | MGLL     |
| 322 Sphingosine 1-phosphate receptor 4                                  | S1PR4    |
| 323 Photoreceptor-specific nuclear receptor                             | NR2E3    |
| 324 Tyrosine-protein phosphatase non-receptor type 7                    | PTPN7    |
| 325 DNA dC->dU-editing enzyme APOBEC-3A                                 | APOBEC3A |
| 326 Thrombopoietin receptor                                             | MPL      |
| 327 Ribonuclease UK114                                                  | RIDA     |
| 328 Peroxiredoxin-5, mitochondrial                                      | PRDX5    |
| 329 Glycine amidinotransferase, mitochondrial                           | GATM     |
| 330 Galactosylgalactosylxylosylprotein 3-beta-glucuronosyltransferase 1 | B3GAT1   |
| 331 Kinesin heavy chain                                                 | KIF5B    |
| 332 Phosphoserine phosphatase                                           | PSPH     |
| 333 Casein kinase II subunit alpha                                      | CSNK2A1  |
| 334 ADP-ribose pyrophosphatase, mitochondrial                           | NUDT9    |
| 335 NAD-dependent malic enzyme, mitochondrial                           | ME2      |
| 336 Intercellular adhesion molecule 2                                   | ICAM2    |
| 337 TGF-beta receptor type-2                                            | TGFBR2   |
| 338 U1 small nuclear ribonucleoprotein A                                | SNRPA    |
| 339 Methionine aminopeptidase 1                                         | METAP1   |
| 340 ADP-ribosylation factor 1                                           | ARF1     |
| 341 Apolipoprotein(a)                                                   | LPA      |
| 342 Heparin-binding growth factor 1                                     | FGF1     |
| 343 Glutaredoxin-1                                                      | GLRX     |
| 344 UDP-glucose 4-epimerase                                             | GALE     |
| 345 Pyruvate dehydrogenase E1 component subunit beta, mitochondrial     | PDHB     |
| 346 Ornithine carbamoyltransferase, mitochondrial                       | OTC      |
| 347 L-lactate dehydrogenase B chain                                     | LDHB     |
| 348 Carboxypeptidase B                                                  | CPB1     |
| 349 Thymidine phosphorylase                                             | TYMP     |
| 350 Renin                                                               | REN      |
| 351 Reticulon-4 receptor                                                | RTN4R    |
| 352 Triosephosphate isomerase                                           | TPI1     |
| 353 Phosphoenolpyruvate carboxykinase, cytosolic [GTP]                  | PCK1     |
| 354 Inositol monophosphatase                                            | IMPA1    |
| 355 Bone morphogenetic protein 7                                        | BMP7     |
| 356 Lactotransferrin                                                    | LTF      |
| 357 Cathepsin B                                                         | CTSB     |
| 358 Basic fibroblast growth factor receptor 1                           | FGFR1    |
| 359 cGMP-specific 3,5-cyclic phosphodiesterase                          | PDE5A    |
| 360 Peroxisome proliferator-activated receptor alpha                    | PPARA    |
| 361 Leukotriene B4 receptor 1                                           | LTB4R    |
| 362 Sphingosine 1-phosphate receptor 1                                  | S1PR1    |
| 363 Cannabinoid receptor 2                                              | CNR2     |
| 364 Prostacyclin receptor                                               | PTGIR    |
| 365 Prostaglandin F2-alpha receptor                                     | PTGFR    |
| 366 Sterol O-acyltransferase 1                                          | SOAT1    |



|                                                                |          |
|----------------------------------------------------------------|----------|
| 367 Prostaglandin D2 receptor                                  | PTGDR    |
| 368 Phospholipase A2, membrane associated                      | PLA2G2A  |
| 369 Sphingosine 1-phosphate receptor 5                         | S1PR5    |
| 370 Prostaglandin E2 receptor EP2 subtype                      | PTGER2   |
| 371 Histone deacetylase 4                                      | HDAC4    |
| 372 Sphingosine 1-phosphate receptor 2                         | S1PR2    |
| 373 Fatty-acid amide hydrolase 1                               | FAAH     |
| 374 Thromboxane A2 receptor                                    | TBXA2R   |
| 375 Thromboxane-A synthase                                     | TBXAS1   |
| 376 Free fatty acid receptor 1                                 | FFAR1    |
| 377 Galanin receptor type 3                                    | GALR3    |
| 378 Sphingosine 1-phosphate receptor 3                         | S1PR3    |
| 379 Farnesyl pyrophosphate synthase                            | FDPS     |
| 380 NAD-dependent protein deacetylase sirtuin-2                | SIRT2    |
| 381 Prostaglandin E2 receptor EP4 subtype                      | PTGER4   |
| 382 Histone deacetylase 3                                      | HDAC3    |
| 383 Cannabinoid receptor 1                                     | CNR1     |
| 384 Cathepsin G                                                | CTSG     |
| 385 DNA dC->dU-editing enzyme APOBEC-3G                        | APOBEC3G |
| 386 Bifunctional epoxide hydrolase 2                           | EPHX2    |
| 387 Histone deacetylase 6                                      | HDAC6    |
| 388 Angiotensin-converting enzyme                              | ACE      |
| 389 Tyrosine-protein phosphatase non-receptor type 2           | PTPN2    |
| 390 Prostaglandin D2 receptor 2                                | PTGDR2   |
| 391 Glutathione-requiring prostaglandin D synthase             | HPGDS    |
| 392 Kynurenine--oxoglutarate transaminase 1                    | KYAT1    |
| 393 Cytochrome P450 11B2, mitochondrial                        | CYP11B2  |
| 394 Serine/threonine-protein kinase pim-2                      | PIM2     |
| 395 Perilipin-5                                                | PLIN5    |
| 396 Cytochrome P450 11B1, mitochondrial                        | CYP11B1  |
| 397 Cell division cycle 7-related protein kinase               | CDC7     |
| 398 Serine/threonine-protein kinase pim-3                      | PIM3     |
| 399 5-hydroxytryptamine receptor 3A                            | HTR3A    |
| 400 Capsid scaffolding protein                                 | UL80     |
| 401 Dual specificity protein kinase CLK1                       | CLK1     |
| 402 Alpha-2C adrenergic receptor                               | ADRA2C   |
| 403 Histamine H4 receptor                                      | HRH4     |
| 404 Voltage-dependent T-type calcium channel subunit alpha-1H  | CACNA1H  |
| 405 NF-kappa-B inhibitor alpha                                 | NFKBIA   |
| 406 Interleukin-1 beta                                         | IL1B     |
| 407 Caspase-1                                                  | CASP1    |
| 408 Interferon gamma                                           | IFNG     |
| 409 Pituitary adenylate cyclase-activating polypeptide         | ADCYAP1  |
| 410 Proteasome assembly chaperone 1                            | PSMG1    |
| 411 Dual specificity mitogen-activated protein kinase kinase 4 | MAP2K4   |
| 412 Corticosteroid 11-beta-dehydrogenase isozyme 2             | HSD11B2  |

|                                                                   |         |
|-------------------------------------------------------------------|---------|
| 413 Sodium/glucose cotransporter 2                                | SLC5A2  |
| 414 Sodium/glucose cotransporter 1                                | SLC5A1  |
| 415 Eosinophil lysophospholipase                                  | CLC     |
| 416 cGMP-inhibited 3,5-cyclic phosphodiesterase B                 | PDE3B   |
| 417 Immunoglobulin alpha Fc receptor                              | FCAR    |
| 418 Cathepsin L2                                                  | CTSV    |
| 419 Chitotriosidase-1                                             | CHIT1   |
| 420 Gastrotropin                                                  | FABP6   |
| 421 Neutrophil collagenase                                        | MMP8    |
| 422 Group 10 secretory phospholipase A2                           | PLA2G10 |
| 423 5-hydroxytryptamine receptor 5A                               | HTR5A   |
| 424 Dual specificity tyrosine-phosphorylation-regulated kinase 1A | DYRK1A  |
| 425 Proto-oncogene tyrosine-protein kinase receptor Ret           | RET     |
| 426 Protein kinase C beta type                                    | PRKCB   |
| 427 Alpha-2B adrenergic receptor                                  | ADRA2B  |
| 428 D(1A) dopamine receptor                                       | DRD1    |
| 429 Macrophage metalloelastase                                    | MMP12   |
| 430 Serine/threonine-protein kinase PAK 7                         | PAK5    |
| 431 Superoxide dismutase [Mn], mitochondrial                      | SOD2    |
| 432 Fibroblast growth factor receptor 2                           | FGFR2   |
| 433 Sorbitol dehydrogenase                                        | SORD    |
| 434 Cytidine deaminase                                            | CDA     |
| 435 Calcium-activated potassium channel subunit alpha 1           | KCNMA1  |
| 436 Alpha-1D adrenergic receptor                                  | ADRA1D  |
| 437 Endothelin-1 receptor                                         | EDNRA   |
| 438 Endothelin B receptor                                         | EDNRB   |
| 439 Dual specificity protein kinase CLK4                          | CLK4    |
| 440 Pyridoxine-5-phosphate oxidase                                | PNPO    |
| 441 Delta-type opioid receptor                                    | OPRD1   |
| 442 Voltage-dependent L-type calcium channel subunit alpha-1S     | CACNA1S |
| 443 Type IV phosphodiesterase                                     | PDE4    |
| 444 5-hydroxytryptamine receptor 1A                               | HTR1A   |
| 445 D(2) dopamine receptor                                        | DRD2    |
| 446 Histamine H1 receptor                                         | HRH1    |
| 447 5-hydroxytryptamine receptor 2C                               | HTR2C   |
| 448 5-hydroxytryptamine receptor 1B                               | HTR1B   |
| 449 Plasminogen                                                   | PLG     |
| 450 Sigma non-opioid intracellular receptor 1                     | SIGMAR1 |
| 451 Retinol-binding protein 4                                     | RBP4    |
| 452 Beta-lactamase                                                | DPEP1   |
| 453 cAMP-dependent protein kinase inhibitor alpha                 | PKIA    |
| 454 Vascular endothelial growth factor A                          | VEGFA   |
| 455 Cyclin-dependent kinase inhibitor 1                           | CDKN1A  |
| 456 Cellular tumor antigen p53                                    | TP53    |
| 457 Fatty acid synthase                                           | FASN    |
| 458 Superoxide dismutase [Cu-Zn]                                  | SOD1    |

|                                                           |         |
|-----------------------------------------------------------|---------|
| 459 Catalase                                              | CAT     |
| 460 Hypoxia-inducible factor 1-alpha                      | HIF1A   |
| 461 Cytosolic phospholipase A2                            | PLA2G4A |
| 462 Canalicular multispecific organic anion transporter 1 | ABCC2   |
| 463 Serine/threonine-protein kinase mTOR                  | MTOR    |
| 464 Catenin alpha-1                                       | CTNNA1  |
| 465 Non-receptor tyrosine-protein kinase TYK2             | TYK2    |
| 466 Glutamate receptor 2                                  | GRIA2   |
| 467 Estrogen receptor                                     | CCND1   |
| 468 Proto-oncogene c-Fos                                  | FOS     |
| 469 Fos-related antigen 1                                 | FOSL1   |
| 470 Fos-related antigen 2                                 | FOSL2   |
| 471 Myeloperoxidase                                       | MPO     |
| 472 Insulin-like growth factor II                         | IGF2    |
| 473 Cytochrome c                                          | CYCS    |
| 474 Nuclear factor of activated T-cells, cytoplasmic 1    | NFATC1  |
| 475 Tudor domain-containing protein 7                     | TDRD7   |
| 476 Egl nine homolog 1                                    | EGLN1   |
| 477 NADPH oxidase 5                                       | NOX5    |
| 478 Fatty acid-binding protein, epidermal                 | FABP5   |
| 479 Apolipoprotein D                                      | APOD    |
| 480 Lysine-specific demethylase 4D-like                   | KDM4E   |
| 481 G protein-coupled receptor kinase 6                   | GRK6    |
| 482 Inosine-5'-monophosphate dehydrogenase 2              | IMPDH2  |
| 483 Carbonyl reductase [NADPH] 1                          | CBR1    |
| 484 Bcl-2-like protein 1                                  | BCL2L1  |
| 485 Interleukin-10                                        | IL10    |
| 486 Retinoblastoma-associated protein                     | RB1     |
| 487 Cell division protein kinase 4                        | CDK4    |
| 488 Interleukin-6                                         | IL6     |
| 489 DNA topoisomerase 1                                   | TOP1    |
| 490 Proliferating cell nuclear antigen                    | PCNA    |
| 491 Receptor tyrosine-protein kinase erbB-2               | ERBB2   |
| 492 Baculoviral IAP repeat-containing protein 5           | BIRC5   |
| 493 Interleukin-2                                         | IL2     |
| 494 Interleukin-4                                         | IL4     |
| 495 Baculoviral IAP repeat-containing protein 4           | BIRC4   |
| 496 CD40 ligand                                           | CD40LG  |
| 497 Kinetochore protein Nuf2                              | NUF2    |
| 498 Adenylate cyclase type 2                              | ADCY2   |
| 499 Hepatocyte growth factor receptor                     | MET     |
| 500 Lymphocyte differentiation antigen CD38               | CD38    |
| 501 Aldo-keto reductase family 1 member B10               | AKR1B10 |
| 502 Tankyrase-2                                           | TNKS2   |
| 503 Tankyrase-1                                           | TNKS    |
| 504 Serine/threonine-protein kinase 6                     | STK6    |

|                                                                                            |          |
|--------------------------------------------------------------------------------------------|----------|
| 505 Casein kinase I isoform gamma-2                                                        | CSNK1G2  |
| 506 Eukaryotic translation initiation factor 6                                             | EIF6     |
| 507 Pro-epidermal growth factor                                                            | EGF      |
| 508 Cyclin-dependent kinase inhibitor 2A, isoforms 1/2/3                                   | CDKN2A   |
| 509 ETS domain-containing protein Elk-1                                                    | ELK1     |
| 510 NADPH--cytochrome P450 reductase                                                       | POR      |
| 511 Ornithine decarboxylase                                                                | ODC1     |
| 512 RAF proto-oncogene serine/threonine-protein kinase                                     | RAF1     |
| 513 Protein CBFA2T1                                                                        | RUNX1T1  |
| 514 Probable E3 ubiquitin-protein ligase HERC5                                             | HERC5    |
| 515 78 kDa glucose-regulated protein                                                       | HSPA5    |
| 516 Acetyl-CoA carboxylase 1                                                               | ACACA    |
| 517 Caveolin-1                                                                             | CAV1     |
| 518 Myc proto-oncogene protein                                                             | MYC      |
| 519 Tissue factor                                                                          | F3       |
| 520 Gap junction alpha-1 protein                                                           | GJA1     |
| 521 C-C motif chemokine 2                                                                  | CCL2     |
| 522 Prostaglandin E2 receptor EP3 subtype                                                  | PTGER3   |
| 523 Interleukin-8                                                                          | CXCL8    |
| 524 Dual oxidase 2                                                                         | DUOX2    |
| 525 Heat shock protein beta-1                                                              | HSPB1    |
| 526 Estrogen sulfotransferase                                                              | SULT1E1  |
| 527 Maltase-glucoamylase, intestinal                                                       | MGAM     |
| 528 Tissue-type plasminogen activator                                                      | PLAT     |
| 529 Thrombomodulin                                                                         | THBD     |
| 530 Plasminogen activator inhibitor 1                                                      | SERPINE1 |
| 531 Collagen alpha-1(I) chain                                                              | COL1A1   |
| 532 Phosphatidylinositol-3,4,5-trisphosphate 3-phosphatase and dual-specific phosphatase 1 | PTEN     |
| 533 Interleukin-1 alpha                                                                    | IL1A     |
| 534 Neutrophil cytosol factor 1                                                            | NCF1     |
| 535 Nuclear factor erythroid 2-related factor 2                                            | NFE2L2   |
| 536 Collagen alpha-1(III) chain                                                            | COL8A1   |
| 537 DNA gyrase subunit B                                                                   | gyrB     |
| 538 C-X-C motif chemokine 11                                                               | CXCL11   |
| 539 C-X-C motif chemokine 2                                                                | CXCL2    |
| 540 DDB1- and CUL4-associated factor 5                                                     | DCAF5    |
| 541 Serine/threonine-protein kinase Chk2                                                   | CHEK2    |
| 542 Claudin-4                                                                              | CLDN4    |
| 543 Heat shock factor protein 1                                                            | HSF1     |
| 544 C-reactive protein                                                                     | CRP      |
| 545 C-X-C motif chemokine 10                                                               | CXCL10   |
| 546 Inhibitor of nuclear factor kappa-B kinase subunit alpha                               | CHUK     |
| 547 Osteopontin                                                                            | SPP1     |
| 548 Runt-related transcription factor 2                                                    | RUNX2    |
| 549 Ras association domain-containing protein 1                                            | RASSF1   |
| 550 Transcription factor E2F1                                                              | E2F1     |

|                                                          |        |
|----------------------------------------------------------|--------|
| 551 Transcription factor E2F2                            | E2F2   |
| 552 Prostatic acid phosphatase                           | ACP3   |
| 553 Insulin-like growth factor-binding protein 3         | IGFBP3 |
| 554 Interferon regulatory factor 1                       | IRF1   |
| 555 Receptor tyrosine-protein kinase erbB-3              | ERBB3  |
| 556 Procollagen C-endopeptidase enhancer 1               | PCOLCE |
| 557 Puromycin-sensitive aminopeptidase                   | NPEPPS |
| 558 Hexokinase-2                                         | HK2    |
| 559 Homeobox protein Nkx-3.1                             | NKX3-1 |
| 560 Ras GTPase-activating protein 1                      | RASA1  |
| 561 Vasopressin V2 receptor                              | AVPR2  |
| 562 Serine/threonine-protein kinase Aurora-B             | AURKB  |
| 563 Dopamine D4 receptor                                 | DRD4   |
| 564 PI3-kinase p85-alpha subunit                         | PIK3R1 |
| 565 Focal adhesion kinase 1                              | PTK2   |
| 566 Carbonic anhydrase III                               | CA3    |
| 567 Protein kinase N1                                    | PKN1   |
| 568 Serine/threonine-protein kinase NEK2                 | NEK2   |
| 569 CaM kinase II beta                                   | CAMK2B |
| 570 ALK tyrosine kinase receptor                         | ALK    |
| 571 Serine/threonine-protein kinase NEK6                 | NEK6   |
| 572 Tyrosine-protein kinase receptor UFO                 | AXL    |
| 573 NUAK family SNF1-like kinase 1                       | NUAK1  |
| 574 Aldo-keto reductase family 1 member C4 (by homology) | AKR1C4 |
| 575 Aldehyde reductase (by homology)                     | AKR1A1 |
| 576 Microtubule-associated protein tau                   | MAPT   |
| 577 Myosin light chain kinase, smooth muscle             | MYLK   |
| 578 DNA-(apurinic or apyrimidinic site) lyase            | APEX1  |
| 579 Platelet-activating factor receptor                  | PTAFR  |
| 580 Histone deacetylase 2                                | HDAC2  |

---
