# Supplementary material for: Integrating Network Pharmacology and Experimental Validation to Elucidate the Mechanism of Yiqi Yangyin Decoction in Suppressing Non‐Small‐Cell Lung Cancer
Source: Hindawi journal article supplement (doi:10.1155/2023/4967544), 2023-01-01
Supplement: f3 [file 4967544.f3.pdf]

**Supplementay Table 2: NSCLC-related targets**

| <b>Number</b> | <b>Protein name</b>                                                         | <b>Gene name</b> |
|---------------|-----------------------------------------------------------------------------|------------------|
| 1             | Tumor Protein P53                                                           | TP53             |
| 2             | Epidermal Growth Factor Receptor                                            | EGFR             |
| 3             | BRCA1 DNA Repair Associated                                                 | BRCA1            |
| 4             | BRCA2 DNA Repair Associated                                                 | BRCA2            |
| 5             | KRAS Proto-Oncogene, GTPase                                                 | KRAS             |
| 6             | Phosphatase And Tensin Homolog                                              | PTEN             |
| 7             | MET Proto-Oncogene, Receptor Tyrosine Kinase                                | MET              |
| 8             | Phosphatidylinositol-4,5-Bisphosphate 3-Kinase Catalytic Subunit A $\alpha$ | PIK3CA           |
| 9             | Erb-B2 Receptor Tyrosine Kinase 2                                           | ERBB2            |
| 10            | ATM Serine/Threonine Kinase                                                 | ATM              |
| 11            | B-Raf Proto-Oncogene, Serine/Threonine Kinase                               | BRAF             |
| 12            | AKT Serine/Threonine Kinase 1                                               | AKT1             |
| 13            | Cyclin Dependent Kinase Inhibitor 2A                                        | CDKN2A           |
| 14            | Cadherin 1                                                                  | CDH1             |
| 15            | ALK Receptor Tyrosine Kinase                                                | ALK              |
| 16            | Checkpoint Kinase 2                                                         | CHEK2            |
| 17            | APC Regulator Of WNT Signaling Pathway                                      | APC              |
| 18            | MutL Homolog 1                                                              | MLH1             |
| 19            | Caspase 8                                                                   | CASP8            |
| 20            | NRAS Proto-Oncogene, GTPase                                                 | NRAS             |
| 21            | MutS Homolog 2                                                              | MSH2             |
| 22            | Catenin Beta 1                                                              | CTNNB1           |
| 23            | RB Transcriptional Corepressor 1                                            | RB1              |
| 24            | MutS Homolog 6                                                              | MSH6             |
| 25            | Serine/Threonine Kinase 11                                                  | STK11            |
| 26            | Cyclin D1                                                                   | CCND1            |
| 27            | Nibrin                                                                      | NBN              |
| 28            | Fas Ligand                                                                  | FASLG            |
| 29            | Mitogen-Activated Protein Kinase Kinase 1                                   | MAP2K1           |
| 30            | HRas Proto-Oncogene, GTPase                                                 | HRAS             |
| 31            | KIT Proto-Oncogene, Receptor Tyrosine Kinase                                | KIT              |
| 32            | Telomerase Reverse Transcriptase                                            | TERT             |
| 33            | PMS1 Homolog 2, Mismatch Repair System Component                            | PMS2             |
| 34            | Fibroblast Growth Factor Receptor 3                                         | FGFR3            |
| 35            | SMAD Family Member 4                                                        | SMAD4            |
| 36            | Ret Proto-Oncogene                                                          | RET              |
| 37            | ROS Proto-Oncogene 1, Receptor Tyrosine Kinase                              | ROS1             |
| 38            | MYC Proto-Oncogene, BHLH Transcription Factor                               | MYC              |
| 39            | Signal Transducer And Activator Of Transcription 3                          | STAT3            |
| 40            | BCL2 Apoptosis Regulator                                                    | BCL2             |
| 41            | Chromosome 11 Open Reading Frame 65                                         | C11orf65         |
| 42            | Interleukin 6                                                               | IL6              |
| 43            | Interferon Regulatory Factor 1                                              | IRF1             |
| 44            | Transforming Growth Factor Beta 1                                           | TGFB1            |

|                                                                     |          |
|---------------------------------------------------------------------|----------|
| 45 Estrogen Receptor 1                                              | ESR1     |
| 46 DNA Polymerase Epsilon, Catalytic Subunit                        | POLE     |
| 47 Parkin RBR E3 Ubiquitin Protein Ligase                           | PRKN     |
| 48 Protein Tyrosine Phosphatase Receptor Type C                     | PTPRC    |
| 49 Tumor Necrosis Factor                                            | TNF      |
| 50 Vascular Endothelial Growth Factor A                             | VEGFA    |
| 51 Fibroblast Growth Factor Receptor 2                              | FGFR2    |
| 52 BRCA1 Associated RING Domain 1                                   | BARD1    |
| 53 BCL2 Associated X, Apoptosis Regulator                           | BAX      |
| 54 Dicer 1, Ribonuclease III                                        | DICER1   |
| 55 Mechanistic Target Of Rapamycin Kinase                           | MTOR     |
| 56 ERCC Excision Repair 6, Chromatin Remodeling Factor              | ERCC6    |
| 57 Epithelial Cell Adhesion Molecule                                | EPCAM    |
| 58 MutY DNA Glycosylase                                             | MUTYH    |
| 59 Solute Carrier Family 22 Member 18                               | SLC22A18 |
| 60 Transforming Growth Factor Beta Receptor 2                       | TGFBR2   |
| 61 Cyclin Dependent Kinase Inhibitor 1B                             | CDKN1B   |
| 62 NK2 Homeobox 1                                                   | NKX2-1   |
| 63 Protein Phosphatase 2 Scaffold Subunit Abeta                     | PPP2R1B  |
| 64 Neurofibromin 1                                                  | NF1      |
| 65 Cyclin Dependent Kinase 4                                        | CDK4     |
| 66 Patched 1                                                        | PTCH1    |
| 67 Adenosine Deaminase                                              | ADA      |
| 68 RAD50 Double Strand Break Repair Protein                         | RAD50    |
| 69 Interleukin 1 Beta                                               | IL1B     |
| 70 MDM2 Proto-Oncogene                                              | MDM2     |
| 71 SWI/SNF Related, Matrix Associated, Actin Dependent Regulator Of | SMARCA4  |
| 72 Fas Cell Surface Death Receptor                                  | FAS      |
| 73 RAD51 Paralog C                                                  | RAD51C   |
| 74 Cyclin Dependent Kinase Inhibitor 1A                             | CDKN1A   |
| 75 CD274 Molecule                                                   | CD274    |
| 76 TSC Complex Subunit 2                                            | TSC2     |
| 77 Cytochrome P450 Family 2 Subfamily A Member 6                    | CYP2A6   |
| 78 SRC Proto-Oncogene, Non-Receptor Tyrosine Kinase                 | SRC      |
| 79 Von Hippel-Lindau Tumor Suppressor                               | VHL      |
| 80 Peroxisome Proliferator Activated Receptor Gamma                 | PPARG    |
| 81 Mitogen-Activated Protein Kinase 1                               | MAPK1    |
| 82 TSC Complex Subunit 1                                            | TSC1     |
| 83 Androgen Receptor                                                | AR       |
| 84 Phosphoinositide-3-Kinase Regulatory Subunit 1                   | PIK3R1   |
| 85 Interferon Gamma                                                 | IFNG     |
| 86 Mitogen-Activated Protein Kinase Kinase Kinase 8                 | MAP3K8   |
| 87 Interleukin 10                                                   | IL10     |
| 88 Leucine Rich Repeat Containing 56                                | LRRC56   |
| 89 Matrix Remodeling Associated 5                                   | MXRA5    |
| 90 C-X-C Motif Chemokine Ligand 8                                   | CXCL8    |

|                                                                 |           |
|-----------------------------------------------------------------|-----------|
| 91 Mucin 1, Cell Surface Associated                             | MUC1      |
| 92 Caspase 3                                                    | CASP3     |
| 93 RAD51 Recombinase                                            | RAD51     |
| 94 Axin 2                                                       | AXIN2     |
| 95 Notch Receptor 1                                             | NOTCH1    |
| 96 C-X-C Motif Chemokine Receptor 4                             | CXCR4     |
| 97 MRE11 Homolog, Double Strand Break Repair Nuclease           | MRE11     |
| 98 Epidermal Growth Factor                                      | EGF       |
| 99 E1A Binding Protein P300                                     | EP300     |
| 100 Tumor Protein P73                                           | TP73      |
| 101 Fibroblast Growth Factor Receptor 1                         | FGFR1     |
| 102 Cytotoxic T-Lymphocyte Associated Protein 4                 | CTLA4     |
| 103 Interleukin 7 Receptor                                      | IL7R      |
| 104 Hypoxia Inducible Factor 1 Subunit Alpha                    | HIF1A     |
| 105 ERCC Excision Repair 2, TFIIH Core Complex Helicase Subunit | ERCC2     |
| 106 BCL10 Immune Signaling Adaptor                              | BCL10     |
| 107 Protein Tyrosine Phosphatase Non-Receptor Type 11           | PTPN11    |
| 108 Kinase Insert Domain Receptor                               | KDR       |
| 109 Matrix Metalloproteinase 9                                  | MMP9      |
| 110 F-Box And WD Repeat Domain Containing 7                     | FBXW7     |
| 111 Janus Kinase 2                                              | JAK2      |
| 112 BRCA1 Associated Protein 1                                  | BAP1      |
| 113 Matrix Metalloproteinase 2                                  | MMP2      |
| 114 Prostaglandin-Endoperoxide Synthase 2                       | PTGS2     |
| 115 ATP Binding Cassette Subfamily B Member 1                   | ABCB1     |
| 116 Fragile Histidine Triad Diadenosine Triphosphatase          | FHIT      |
| 117 Nuclear Factor Kappa B Subunit 1                            | NFKB1     |
| 118 Insulin Like Growth Factor 2                                | IGF2      |
| 119 CD44 Molecule (Indian Blood Group)                          | CD44      |
| 120 Programmed Cell Death 1                                     | PDCD1     |
| 121 TNF Receptor Superfamily Member 10b                         | TNFRSF10B |
| 122 SET Domain Containing 2, Histone Lysine Methyltransferase   | SETD2     |
| 123 Sarcolemma Associated Protein                               | SLMAP     |
| 124 PiggyBac Transposable Element Derived 3                     | PGBD3     |
| 125 Recombination Activating 2                                  | RAG2      |
| 126 ERCC Excision Repair 1, Endonuclease Non-Catalytic Subunit  | ERCC1     |
| 127 Menin 1                                                     | MEN1      |
| 128 Interleukin 2                                               | IL2       |
| 129 Catenin Alpha 1                                             | CTNNA1    |
| 130 Baculoviral IAP Repeat Containing 5                         | BIRC5     |
| 131 Signal Transducer And Activator Of Transcription 1          | STAT1     |
| 132 MutS Homolog 3                                              | MSH3      |
| 133 Jun Proto-Oncogene, AP-1 Transcription Factor Subunit       | JUN       |
| 134 X-Ray Repair Cross Complementing 3                          | XRCC3     |
| 135 NFE2 Like BZIP Transcription Factor 2                       | NFE2L2    |
| 136 Aurora Kinase A                                             | AURKA     |

|                                                                      |          |
|----------------------------------------------------------------------|----------|
| 137 Integrin Subunit Beta 1                                          | ITGB1    |
| 138 Kruppel Like Factor 6                                            | KLF6     |
| 139 RUNX Family Transcription Factor 1                               | RUNX1    |
| 140 Platelet Derived Growth Factor Receptor Alpha                    | PDGFRA   |
| 141 Insulin Like Growth Factor 1 Receptor                            | IGF1R    |
| 142 Raf-1 Proto-Oncogene, Serine/Threonine Kinase                    | RAF1     |
| 143 Janus Kinase 3                                                   | JAK3     |
| 144 Tumor Protein P63                                                | TP63     |
| 145 Fibroblast Growth Factor 2                                       | FGF2     |
| 146 BCL2 Like 1                                                      | BCL2L1   |
| 147 CEA Cell Adhesion Molecule 5                                     | CEACAM5  |
| 148 Bone Morphogenetic Protein Receptor Type 1A                      | BMPR1A   |
| 149 Major Histocompatibility Complex, Class II, DR Beta 1            | HLA-DRB1 |
| 150 Interleukin 4                                                    | IL4      |
| 151 X-Ray Repair Cross Complementing 1                               | XRCC1    |
| 152 BCL6 Transcription Repressor                                     | BCL6     |
| 153 Caveolin 1                                                       | CAV1     |
| 154 Colony Stimulating Factor 3                                      | CSF3     |
| 155 SRY-Box Transcription Factor 9                                   | SOX9     |
| 156 8-Oxoguanine DNA Glycosylase                                     | OGG1     |
| 157 Proliferating Cell Nuclear Antigen                               | PCNA     |
| 158 NFkB Inhibitor Alpha                                             | NFKBIA   |
| 159 Hepatocyte Growth Factor                                         | HGF      |
| 160 MutL Homolog 3                                                   | MLH3     |
| 161 Surfactant Protein A1                                            | SFTPA1   |
| 162 Cytochrome P450 Family 1 Subfamily A Member 1                    | CYP1A1   |
| 163 ABL Proto-Oncogene 1, Non-Receptor Tyrosine Kinase               | ABL1     |
| 164 Mitogen-Activated Protein Kinase 8                               | MAPK8    |
| 165 Discoidin Domain Receptor Tyrosine Kinase 2                      | DDR2     |
| 166 KIT Ligand                                                       | KITLG    |
| 167 C-X-C Motif Chemokine Ligand 12                                  | CXCL12   |
| 168 Cyclin Dependent Kinase 2                                        | CDK2     |
| 169 Glutathione S-Transferase Pi 1                                   | GSTP1    |
| 170 Insulin Like Growth Factor 1                                     | IGF1     |
| 171 X-Linked Inhibitor Of Apoptosis                                  | XIAP     |
| 172 Intercellular Adhesion Molecule 1                                | ICAM1    |
| 173 Secreted Phosphoprotein 1                                        | SPP1     |
| 174 RELA Proto-Oncogene, NF-KB Subunit                               | RELA     |
| 175 Platelet Derived Growth Factor Receptor Beta                     | PDGFRB   |
| 176 Neural Cell Adhesion Molecule 1                                  | NCAM1    |
| 177 SWI/SNF Related, Matrix Associated, Actin Dependent Regulator Of | SMARCB1  |
| 178 Erb-B2 Receptor Tyrosine Kinase 3                                | ERBB3    |
| 179 Ras Homolog Family Member A                                      | RHOA     |
| 180 Enhancer Of Zeste 2 Polycomb Repressive Complex 2 Subunit        | EZH2     |
| 181 SMAD Family Member 3                                             | SMAD3    |
| 182 WT1 Transcription Factor                                         | WT1      |

|                                                                            |         |
|----------------------------------------------------------------------------|---------|
| 183 Isocitrate Dehydrogenase (NADP(+)) 1                                   | IDH1    |
| 184 X-Ray Repair Cross Complementing 2                                     | XRCC2   |
| 185 Fibronectin 1                                                          | FN1     |
| 186 MCL1 Apoptosis Regulator, BCL2 Family Member                           | MCL1    |
| 187 CD4 Molecule                                                           | CD4     |
| 188 Poly(ADP-Ribose) Polymerase 1                                          | PARP1   |
| 189 Colony Stimulating Factor 2                                            | CSF2    |
| 190 Glutathione S-Transferase Mu 1                                         | GSTM1   |
| 191 Protein Tyrosine Kinase 2                                              | PTK2    |
| 192 O-6-Methylguanine-DNA Methyltransferase                                | MGMT    |
| 193 Caspase 9                                                              | CASP9   |
| 194 Forkhead Box P3                                                        | FOXP3   |
| 195 Interleukin 2 Receptor Subunit Alpha                                   | IL2RA   |
| 196 Homeobox B13                                                           | HOXB13  |
| 197 Enolase 2                                                              | ENO2    |
| 198 Toll Like Receptor 2                                                   | TLR2    |
| 199 Estrogen Receptor 2                                                    | ESR2    |
| 200 Keratin 19                                                             | KRT19   |
| 201 Cyclin Dependent Kinase 6                                              | CDK6    |
| 202 Cyclin Dependent Kinase 1                                              | CDK1    |
| 203 Matrix Metalloproteinase 1                                             | MMP1    |
| 204 Retinoic Acid Receptor Beta                                            | RARB    |
| 205 Inhibitor Of Growth Family Member 1                                    | ING1    |
| 206 TNF Superfamily Member 10                                              | TNFSF10 |
| 207 Cyclin Dependent Kinase Inhibitor 2B                                   | CDKN2B  |
| 208 Surfactant Protein C                                                   | SFTPC   |
| 209 Transforming Growth Factor Beta Receptor 1                             | TGFBR1  |
| 210 Rac Family Small GTPase 1                                              | RAC1    |
| 211 Phosphatidylinositol-4,5-Bisphosphate 3-Kinase Catalytic Subunit Gamma | PIK3CG  |
| 212 Marker Of Proliferation Ki-67                                          | MKI67   |
| 213 Fms Related Receptor Tyrosine Kinase 1                                 | FLT1    |
| 214 Mitogen-Activated Protein Kinase 14                                    | MAPK14  |
| 215 SRY-Box Transcription Factor 2                                         | SOX2    |
| 216 Mitogen-Activated Protein Kinase 3                                     | MAPK3   |
| 217 ATP Binding Cassette Subfamily G Member 2 (Junior Blood Group)         | ABCG2   |
| 218 AKT Serine/Threonine Kinase 2                                          | AKT2    |
| 219 Ras Association Domain Family Member 1                                 | RASSF1  |
| 220 Thymidylate Synthetase                                                 | TYMS    |
| 221 BUB1 Mitotic Checkpoint Serine/Threonine Kinase B                      | BUB1B   |
| 222 C-C Motif Chemokine Ligand 2                                           | CCL2    |
| 223 Transforming Growth Factor Alpha                                       | TGFA    |
| 224 Plasminogen Activator, Urokinase                                       | PLAU    |
| 225 GATA Binding Protein 2                                                 | GATA2   |
| 226 ATP Binding Cassette Subfamily C Member 1                              | ABCC1   |
| 227 DNA Methyltransferase 1                                                | DNMT1   |
| 228 MYCN Proto-Oncogene, BHLH Transcription Factor                         | MYCN    |

|                                                                |          |
|----------------------------------------------------------------|----------|
| 229 Nucleophosmin 1                                            | NPM1     |
| 230 CF Transmembrane Conductance Regulator                     | CFTR     |
| 231 CD40 Molecule                                              | CD40     |
| 232 E2F Transcription Factor 1                                 | E2F1     |
| 233 POU Class 5 Homeobox 1                                     | POU5F1   |
| 234 Fms Related Receptor Tyrosine Kinase 3                     | FLT3     |
| 235 Endoglin                                                   | ENG      |
| 236 Keratin 7                                                  | KRT7     |
| 237 Cell Adhesion Molecule 1                                   | CADM1    |
| 238 Toll Like Receptor 4                                       | TLR4     |
| 239 Prominin 1                                                 | PROM1    |
| 240 Erb-B2 Receptor Tyrosine Kinase 4                          | ERBB4    |
| 241 Cytochrome C, Somatic                                      | CYCS     |
| 242 Solute Carrier Family 2 Member 1                           | SLC2A1   |
| 243 Integrin Subunit Alpha 3                                   | ITGA3    |
| 244 DNA Methyltransferase 3 Alpha                              | DNMT3A   |
| 245 Platelet And Endothelial Cell Adhesion Molecule 1          | PECAM1   |
| 246 Caspase 10                                                 | CASP10   |
| 247 Melanocyte Inducing Transcription Factor                   | MITF     |
| 248 EPH Receptor B2                                            | EPHB2    |
| 249 Cell Division Cycle 42                                     | CDC42    |
| 250 Hepatitis A Virus Cellular Receptor 2                      | HAVCR2   |
| 251 AT-Rich Interaction Domain 1A                              | ARID1A   |
| 252 Sp1 Transcription Factor                                   | SP1      |
| 253 Yes1 Associated Transcriptional Regulator                  | YAP1     |
| 254 Vimentin                                                   | VIM      |
| 255 Heat Shock Protein 90 Alpha Family Class A Member 1        | HSP90AA1 |
| 256 DLEC1 Cilia And Flagella Associated Protein                | DLEC1    |
| 257 Protein Kinase C Alpha                                     | PRKCA    |
| 258 Kelch Like ECH Associated Protein 1                        | KEAP1    |
| 259 CAMP Responsive Element Binding Protein 1                  | CREB1    |
| 260 Chromogranin A                                             | CHGA     |
| 261 Cyclin B1                                                  | CCNB1    |
| 262 DNA Topoisomerase II Alpha                                 | TOP2A    |
| 263 Major Histocompatibility Complex, Class I, B               | HLA-B    |
| 264 Cyclin A2                                                  | CCNA2    |
| 265 Beta-2-Microglobulin                                       | B2M      |
| 266 Interleukin 3                                              | IL3      |
| 267 Zeta Chain Of T Cell Receptor Associated Protein Kinase 70 | ZAP70    |
| 268 Vascular Endothelial Growth Factor C                       | VEGFC    |
| 269 Fms Related Receptor Tyrosine Kinase 4                     | FLT4     |
| 270 Major Histocompatibility Complex, Class I, G               | HLA-G    |
| 271 Retinoic Acid Receptor Alpha                               | RARA     |
| 272 Platelet Derived Growth Factor Subunit B                   | PDGFB    |
| 273 Hemoglobin Subunit Beta                                    | HBB      |
| 274 Serpin Family A Member 1                                   | SERPINA1 |

|                                                              |        |
|--------------------------------------------------------------|--------|
| 275 Heme Oxygenase 1                                         | HMOX1  |
| 276 Zinc Finger E-Box Binding Homeobox 1                     | ZEB1   |
| 277 Cadherin 2                                               | CDH2   |
| 278 Insulin Like Growth Factor Binding Protein 3             | IGFBP3 |
| 279 DNA Polymerase Kappa                                     | POLK   |
| 280 Macrophage Scavenger Receptor 1                          | MSR1   |
| 281 NAD(P)H Quinone Dehydrogenase 1                          | NQO1   |
| 282 WW Domain Containing Oxidoreductase                      | WWOX   |
| 283 GNAS Complex Locus                                       | GNAS   |
| 284 Protein Kinase C Delta                                   | PRKCD  |
| 285 Surfactant Protein A2                                    | SFTPA2 |
| 286 NF2, Moesin-Ezrin-Radixin Like (MERLIN) Tumor Suppressor | NF2    |
| 287 Albumin                                                  | ALB    |
| 288 Keratin 18                                               | KRT18  |
| 289 Mucin 5B, Oligomeric Mucus/Gel-Forming                   | MUC5B  |
| 290 C-C Motif Chemokine Receptor 6                           | CCR6   |
| 291 XPA, DNA Damage Recognition And Repair Factor            | XPA    |
| 292 DNA Topoisomerase I                                      | TOP1   |
| 293 Interleukin 1 Receptor Antagonist                        | IL1RN  |
| 294 Baculoviral IAP Repeat Containing 3                      | BIRC3  |
| 295 Checkpoint Kinase 1                                      | CHEK1  |
| 296 ERCC Excision Repair 4, Endonuclease Catalytic Subunit   | ERCC4  |
| 297 CD28 Molecule                                            | CD28   |
| 298 Matrix Metalloproteinase 14                              | MMP14  |
| 299 SMAD Family Member 2                                     | SMAD2  |
| 300 High Mobility Group Box 1                                | HMGB1  |
| 301 Fos Proto-Oncogene, AP-1 Transcription Factor Subunit    | FOS    |
| 302 Isocitrate Dehydrogenase (NADP(+)) 2                     | IDH2   |
| 303 GLI Family Zinc Finger 1                                 | GLI1   |
| 304 Plasminogen Activator, Urokinase Receptor                | PLAUR  |
| 305 Gap Junction Protein Alpha 1                             | GJA1   |
| 306 DNA Methyltransferase 3 Beta                             | DNMT3B |
| 307 Mitotic Arrest Deficient 1 Like 1                        | MAD1L1 |
| 308 Synaptophysin                                            | SYP    |
| 309 C-C Motif Chemokine Ligand 5                             | CCL5   |
| 310 Cyclin Dependent Kinase Inhibitor 3                      | CDKN3  |
| 311 Twist Family BHLH Transcription Factor 1                 | TWIST1 |
| 312 TIMP Metalloproteinase Inhibitor 1                       | TIMP1  |
| 313 Nitric Oxide Synthase 2                                  | NOS2   |
| 314 Spleen Associated Tyrosine Kinase                        | SYK    |
| 315 Polo Like Kinase 1                                       | PLK1   |
| 316 Cytochrome P450 Family 1 Subfamily B Member 1            | CYP1B1 |
| 317 Progesterone Receptor                                    | PGR    |
| 318 Superoxide Dismutase 2                                   | SOD2   |
| 319 Thymidine Phosphorylase                                  | TYMP   |
| 320 Interleukin 7                                            | IL7    |

|                                                                            |        |
|----------------------------------------------------------------------------|--------|
| 321 Thrombospondin 1                                                       | THBS1  |
| 322 NME/NM23 Nucleoside Diphosphate Kinase 1                               | NME1   |
| 323 CD34 Molecule                                                          | CD34   |
| 324 CASP8 And FADD Like Apoptosis Regulator                                | CFLAR  |
| 325 Mucin 16, Cell Surface Associated                                      | MUC16  |
| 326 DLC1 Rho GTPase Activating Protein                                     | DLC1   |
| 327 Sonic Hedgehog Signaling Molecule                                      | SHH    |
| 328 Macrophage Migration Inhibitory Factor                                 | MIF    |
| 329 CREB Binding Protein                                                   | CREBBP |
| 330 Inhibitor Of Nuclear Factor Kappa B Kinase Subunit Beta                | IKBKB  |
| 331 Desmoplakin                                                            | DSP    |
| 332 Matrix Metalloproteinase 7                                             | MMP7   |
| 333 Phosphatidylinositol-4,5-Bisphosphate 3-Kinase Catalytic Subunit Delta | PIK3CD |
| 334 BUB1 Mitotic Checkpoint Serine/Threonine Kinase                        | BUB1   |
| 335 Protein Phosphatase, Mg <sup>2+</sup> /Mn <sup>2+</sup> Dependent 1D   | PPM1D  |
| 336 Insulin                                                                | INS    |
| 337 EPH Receptor A2                                                        | EPHA2  |
| 338 Methylenetetrahydrofolate Reductase                                    | MTHFR  |
| 339 Snail Family Transcriptional Repressor 1                               | SNAI1  |
| 340 MYC Associated Factor X                                                | MAX    |
| 341 Heat Shock Protein Family B (Small) Member 1                           | HSPB1  |
| 342 Major Histocompatibility Complex, Class I, A                           | HLA-A  |
| 343 Gastrin Releasing Peptide                                              | GRP    |
| 344 Interleukin 17A                                                        | IL17A  |
| 345 ATR Serine/Threonine Kinase                                            | ATR    |
| 346 Prohibitin 1                                                           | PHB1   |
| 347 Cyclin D3                                                              | CCND3  |
| 348 Snail Family Transcriptional Repressor 2                               | SNAI2  |
| 349 PMS1 Homolog 1, Mismatch Repair System Component                       | PMS1   |
| 350 Protection Of Telomeres 1                                              | POT1   |
| 351 ETS Variant Transcription Factor 6                                     | ETV6   |
| 352 BCL2 Associated Agonist Of Cell Death                                  | BAD    |
| 353 Zinc Finger Homeobox 3                                                 | ZFX3   |
| 354 Smoothed, Frizzled Class Receptor                                      | SMO    |
| 355 Thy-1 Cell Surface Antigen                                             | THY1   |
| 356 Histone Deacetylase 1                                                  | HDAC1  |
| 357 Neuregulin 1                                                           | NRG1   |
| 358 MYB Proto-Oncogene, Transcription Factor                               | MYB    |
| 359 Protein Kinase D1                                                      | PRKD1  |
| 360 BCR Activator Of RhoGEF And GTPase                                     | BCR    |
| 361 Receptor Interacting Serine/Threonine Kinase 1                         | RIPK1  |
| 362 Actin Alpha 2, Smooth Muscle                                           | ACTA2  |
| 363 BCL2 Antagonist/Killer 1                                               | BAK1   |
| 364 Interleukin 13                                                         | IL13   |
| 365 FA Complementatation Group D2                                          | FANCD2 |
| 366 Damage Specific DNA Binding Protein 2                                  | DDB2   |



|                                                      |          |
|------------------------------------------------------|----------|
| 367 Bone Morphogenetic Protein 6                     | BMP6     |
| 368 Ribosomal Protein S6 Kinase B1                   | RPS6KB1  |
| 369 Cbl Proto-Oncogene                               | CBL      |
| 370 BCL2 Like 11                                     | BCL2L11  |
| 371 Basigin (Ok Blood Group)                         | BSG      |
| 372 Paired Box 5                                     | PAX5     |
| 373 CD8a Molecule                                    | CD8A     |
| 374 SOS Ras/Rac Guanine Nucleotide Exchange Factor 1 | SOS1     |
| 375 Abraxas 1, BRCA1 A Complex Subunit               | ABRAXAS1 |
| 376 Transferrin Receptor                             | TFRC     |
| 377 Heat Shock Protein Family A (Hsp70) Member 5     | HSPA5    |
| 378 Cell Division Cycle 25A                          | CDC25A   |
| 379 Annexin A5                                       | ANXA5    |
| 380 Amphiregulin                                     | AREG     |
| 381 Keratin 8                                        | KRT8     |
| 382 Protein Tyrosine Kinase 2 Beta                   | PTK2B    |
| 383 Bone Morphogenetic Protein 2                     | BMP2     |
| 384 AKT Serine/Threonine Kinase 3                    | AKT3     |
| 385 Neuropilin 1                                     | NRP1     |
| 386 Cancer/Testis Antigen 1B                         | CTAG1B   |
| 387 Epithelial Cell Transforming 2                   | ECT2     |
| 388 Serpin Family E Member 1                         | SERPINE1 |
| 389 SMAD Family Member 7                             | SMAD7    |
| 390 Homeostatic Iron Regulator                       | HFE      |
| 391 Parathyroid Hormone Like Hormone                 | PTH1H    |
| 392 C-C Motif Chemokine Receptor 7                   | CCR7     |
| 393 Keratin 5                                        | KRT5     |
| 394 Cyclin E1                                        | CCNE1    |
| 395 CD36 Molecule                                    | CD36     |
| 396 Integrin Subunit Alpha 6                         | ITGA6    |
| 397 S-Phase Kinase Associated Protein 2              | SKP2     |
| 398 Dihydrofolate Reductase                          | DHFR     |
| 399 CEA Cell Adhesion Molecule 3                     | CEACAM3  |
| 400 Surfactant Protein B                             | SFTPB    |
| 401 Interleukin 1 Alpha                              | IL1A     |
| 402 Catenin Delta 1                                  | CTNND1   |
| 403 U2 Small Nuclear RNA Auxiliary Factor 1          | U2AF1    |
| 404 Histone Deacetylase 9                            | HDAC9    |
| 405 Forkhead Box O3                                  | FOXO3    |
| 406 Interleukin 2 Receptor Subunit Gamma             | IL2RG    |
| 407 AXL Receptor Tyrosine Kinase                     | AXL      |
| 408 TIMP Metalloproteinase Inhibitor 2               | TIMP2    |
| 409 Insulin Receptor Substrate 1                     | IRS1     |
| 410 Neurotrophic Receptor Tyrosine Kinase 1          | NTRK1    |
| 411 Podoplanin                                       | PDPN     |
| 412 Minichromosome Maintenance Complex Component 4   | MCM4     |

|                                                                     |           |
|---------------------------------------------------------------------|-----------|
| 413 Cell Division Cycle 25C                                         | CDC25C    |
| 414 Integrin Subunit Alpha V                                        | ITGAV     |
| 415 Transforming Growth Factor Beta 2                               | TGFB2     |
| 416 WD Repeat Containing Antisense To TP53                          | WRAP53    |
| 417 Polybromo 1                                                     | PBRM1     |
| 418 Forkhead Box M1                                                 | FOXM1     |
| 419 Nitric Oxide Synthase 3                                         | NOS3      |
| 420 Apurinic/Apyrimidinic Endodeoxyribonuclease 1                   | APEX1     |
| 421 Hyaluronan Mediated Motility Receptor                           | HMMR      |
| 422 Leptin                                                          | LEP       |
| 423 Component Of Inhibitor Of Nuclear Factor Kappa B Kinase Complex | CHUK      |
| 424 SHC Adaptor Protein 1                                           | SHC1      |
| 425 CD40 Ligand                                                     | CD40LG    |
| 426 Endothelin 1                                                    | EDN1      |
| 427 Carbonic Anhydrase 9                                            | CA9       |
| 428 Keratin 20                                                      | KRT20     |
| 429 Cyclin Dependent Kinase Inhibitor 1C                            | CDKN1C    |
| 430 Secreted Protein Acidic And Cysteine Rich                       | SPARC     |
| 431 Fibroblast Growth Factor Receptor 4                             | FGFR4     |
| 432 Major Vault Protein                                             | MVP       |
| 433 Myeloperoxidase                                                 | MPO       |
| 434 Lysyl Oxidase                                                   | LOX       |
| 435 TNF Receptor Superfamily Member 10a                             | TNFRSF10A |
| 436 RAS P21 Protein Activator 1                                     | RASA1     |
| 437 Cathepsin B                                                     | CTSB      |
| 438 Serpin Family A Member 3                                        | SERPINA3  |
| 439 Major Histocompatibility Complex, Class II, DQ Beta 1           | HLA-DQB1  |
| 440 EMAP Like 4                                                     | EML4      |
| 441 C-Reactive Protein                                              | CRP       |
| 442 Death Associated Protein Kinase 1                               | DAPK1     |
| 443 Phospholipase A2 Group IIA                                      | PLA2G2A   |
| 444 Integrin Subunit Beta 3                                         | ITGB3     |
| 445 Nuclear Factor Kappa B Subunit 2                                | NFKB2     |
| 446 ATP Binding Cassette Subfamily C Member 2                       | ABCC2     |
| 447 Heat Shock Protein Family A (Hsp70) Member 4                    | HSPA4     |
| 448 Angiopoietin 2                                                  | ANGPT2    |
| 449 BH3 Interacting Domain Death Agonist                            | BID       |
| 450 Gremlin 1, DAN Family BMP Antagonist                            | GREM1     |
| 451 Cellular Communication Network Factor 2                         | CCN2      |
| 452 Paxillin                                                        | PXN       |
| 453 Glypican 3                                                      | GPC3      |
| 454 Forkhead Box O1                                                 | FOXO1     |
| 455 Membrane Metalloendopeptidase                                   | MME       |
| 456 Signal Transducer And Activator Of Transcription 5B             | STAT5B    |
| 457 Protein Kinase C Iota                                           | PRKCI     |
| 458 Laminin Subunit Gamma 2                                         | LAMC2     |

|                                                                           |         |
|---------------------------------------------------------------------------|---------|
| 459 CD24 Molecule                                                         | CD24    |
| 460 Colony Stimulating Factor 1                                           | CSF1    |
| 461 Mucin 4, Cell Surface Associated                                      | MUC4    |
| 462 DNA Ligase 4                                                          | LIG4    |
| 463 Interleukin 4 Receptor                                                | IL4R    |
| 464 Interferon Alpha 1                                                    | IFNA1   |
| 465 Matrix Metalloproteinase 3                                            | MMP3    |
| 466 Dihydropyrimidine Dehydrogenase                                       | DPYD    |
| 467 Cyclin D2                                                             | CCND2   |
| 468 Protein Kinase CAMP-Dependent Type I Regulatory Subunit Alpha         | PRKAR1A |
| 469 Fibroblast Growth Factor 7                                            | FGF7    |
| 470 Vitamin D Receptor                                                    | VDR     |
| 471 Programmed Cell Death 4                                               | PDCD4   |
| 472 YY1 Transcription Factor                                              | YY1     |
| 473 A-Raf Proto-Oncogene, Serine/Threonine Kinase                         | ARAF    |
| 474 Calreticulin                                                          | CALR    |
| 475 RUNX Family Transcription Factor 3                                    | RUNX3   |
| 476 Integrin Subunit Alpha 5                                              | ITGA5   |
| 477 Junction Plakoglobin                                                  | JUP     |
| 478 Cytochrome P450 Family 19 Subfamily A Member 1                        | CYP19A1 |
| 479 Phosphatidylinositol-4,5-Bisphosphate 3-Kinase Catalytic Subunit Beta | PIK3CB  |
| 480 Bone Morphogenetic Protein 4                                          | BMP4    |
| 481 Inducible T Cell Costimulator Ligand                                  | ICOSLG  |
| 482 Notch Receptor 3                                                      | NOTCH3  |
| 483 Surfactant Protein D                                                  | SFTPD   |
| 484 Taurine Up-Regulated 1                                                | TUG1    |
| 485 RB1 Inducible Coiled-Coil 1                                           | RB1CC1  |
| 486 SWI/SNF Related, Matrix Associated, Actin Dependent Regulator Of      | SMARCE1 |
| 487 Phospholipase C Gamma 1                                               | PLCG1   |
| 488 TIMP Metalloproteinase Inhibitor 3                                    | TIMP3   |
| 489 High Mobility Group AT-Hook 2                                         | HMGA2   |
| 490 MCC Regulator Of WNT Signaling Pathway                                | MCC     |
| 491 Killer Cell Lectin Like Receptor K1                                   | KLRK1   |
| 492 Interleukin 15                                                        | IL15    |
| 493 Thyroid Hormone Receptor Interactor 13                                | TRIP13  |
| 494 Interferon Alpha Inducible Protein 27                                 | IFI27   |
| 495 Periostin                                                             | POSTN   |
| 496 Claudin 7                                                             | CLDN7   |
| 497 Fascin Actin-Bundling Protein 1                                       | FSCN1   |
| 498 Transcription Factor 7 Like 2                                         | TCF7L2  |
| 499 CEA Cell Adhesion Molecule 6                                          | CEACAM6 |
| 500 XPC Complex Subunit, DNA Damage Recognition And Repair Factor         | XPC     |
| 501 Collagen Type I Alpha 1 Chain                                         | COL1A1  |
| 502 Enolase 1                                                             | ENO1    |
| 503 Cyclin Dependent Kinase Inhibitor 2C                                  | CDKN2C  |
| 504 MYD88 Innate Immune Signal Transduction Adaptor                       | MYD88   |

|                                                                    |          |
|--------------------------------------------------------------------|----------|
| 505 Drosha Ribonuclease III                                        | DROSHA   |
| 506 Early Growth Response 1                                        | EGR1     |
| 507 Glycogen Synthase Kinase 3 Beta                                | GSK3B    |
| 508 X-Ray Repair Cross Complementing 5                             | XRCC5    |
| 509 Insulin Like Growth Factor 2 Receptor                          | IGF2R    |
| 510 Cytochrome P450 Family 3 Subfamily A Member 4                  | CYP3A4   |
| 511 Aldehyde Dehydrogenase 1 Family Member A1                      | ALDH1A1  |
| 512 C-X-C Motif Chemokine Receptor 2                               | CXCR2    |
| 513 LCK Proto-Oncogene, Src Family Tyrosine Kinase                 | LCK      |
| 514 Glyceraldehyde-3-Phosphate Dehydrogenase                       | GAPDH    |
| 515 S100 Calcium Binding Protein A4                                | S100A4   |
| 516 Axin 1                                                         | AXIN1    |
| 517 Growth Arrest And DNA Damage Inducible Alpha                   | GADD45A  |
| 518 Perforin 1                                                     | PRF1     |
| 519 Erythropoietin                                                 | EPO      |
| 520 Interleukin 6 Receptor                                         | IL6R     |
| 521 Cadherin 13                                                    | CDH13    |
| 522 Aurora Kinase B                                                | AURKB    |
| 523 N-Acetyltransferase 2                                          | NAT2     |
| 524 Superoxide Dismutase 1                                         | SOD1     |
| 525 Inhibitor Of DNA Binding 1, HLH Protein                        | ID1      |
| 526 Achaete-Scute Family BHLH Transcription Factor 1               | ASCL1    |
| 527 Mitogen-Activated Protein Kinase Kinase 2                      | MAP2K2   |
| 528 TNF Receptor Superfamily Member 1B                             | TNFRSF1B |
| 529 Ribonucleotide Reductase Catalytic Subunit M1                  | RRM1     |
| 530 Cytochrome P450 Family 2 Subfamily D Member 6                  | CYP2D6   |
| 531 Tyrosine 3-Monooxygenase/Tryptophan 5-Monooxygenase Activation | YWHAE    |
| 532 Galectin 3                                                     | LGALS3   |
| 533 Platelet Derived Growth Factor Receptor Like                   | PDGFRL   |
| 534 Inducible T Cell Costimulator                                  | ICOS     |
| 535 BMI1 Proto-Oncogene, Polycomb Ring Finger                      | BMI1     |
| 536 Colony Stimulating Factor 1 Receptor                           | CSF1R    |
| 537 Toll Like Receptor 9                                           | TLR9     |
| 538 Baculoviral IAP Repeat Containing 2                            | BIRC2    |
| 539 Beclin 1                                                       | BECN1    |
| 540 Elastase, Neutrophil Expressed                                 | ELANE    |
| 541 Notch Receptor 2                                               | NOTCH2   |
| 542 Caspase 7                                                      | CASP7    |
| 543 Cytochrome P450 Family 2 Subfamily E Member 1                  | CYP2E1   |
| 544 Integrin Subunit Alpha 2                                       | ITGA2    |
| 545 Somatostatin                                                   | SST      |
| 546 RB Binding Protein 8, Endonuclease                             | RBBP8    |
| 547 Integrin Linked Kinase                                         | ILK      |
| 548 Transketolase                                                  | TKT      |
| 549 Fatty Acid Synthase                                            | FASN     |
| 550 Zinc Finger E-Box Binding Homeobox 2                           | ZEB2     |

|                                                            |          |
|------------------------------------------------------------|----------|
| 551 X-Ray Repair Cross Complementing 6                     | XRCC6    |
| 552 GATA Binding Protein 3                                 | GATA3    |
| 553 Angiotensin I Converting Enzyme                        | ACE      |
| 554 Angiopoietin 1                                         | ANGPT1   |
| 555 Ezrin                                                  | EZR      |
| 556 Thioredoxin                                            | TXN      |
| 557 Galectin 1                                             | LGALS1   |
| 558 TNF Receptor Superfamily Member 1A                     | TNFRSF1A |
| 559 Vascular Endothelial Growth Factor D                   | VEGFD    |
| 560 Lamin A/C                                              | LMNA     |
| 561 E2F Transcription Factor 3                             | E2F3     |
| 562 Nucleotide Binding Oligomerization Domain Containing 2 | NOD2     |
| 563 Eukaryotic Translation Initiation Factor 4E            | EIF4E    |
| 564 Tubulin Beta Class I                                   | TUBB     |
| 565 Y-Box Binding Protein 1                                | YBX1     |
| 566 Clusterin                                              | CLU      |
| 567 IL2 Inducible T Cell Kinase                            | ITK      |
| 568 ETS Proto-Oncogene 1, Transcription Factor             | ETS1     |
| 569 Glutathione S-Transferase Theta 1                      | GSTT1    |
| 570 TNF Superfamily Member 11                              | TNFSF11  |
| 571 MPL Proto-Oncogene, Thrombopoietin Receptor            | MPL      |
| 572 CD247 Molecule                                         | CD247    |
| 573 Kruppel Like Factor 4                                  | KLF4     |
| 574 RUNX Family Transcription Factor 2                     | RUNX2    |
| 575 Nuclear Receptor Binding SET Domain Protein 1          | NSD1     |
| 576 Lysine Methyltransferase 2D                            | KMT2D    |
| 577 Retinoid X Receptor Alpha                              | RXRA     |
| 578 Alanine Aminopeptidase, Membrane                       | ANPEP    |
| 579 Aldolase, Fructose-Bisphosphate A                      | ALDOA    |
| 580 Insulin Receptor                                       | INSR     |
| 581 Mitochondrially Encoded Cytochrome C Oxidase I         | MT-CO1   |
| 582 Serpin Family B Member 5                               | SERPINB5 |
| 583 Alpha Fetoprotein                                      | AFP      |
| 584 Kallikrein Related Peptidase 3                         | KLK3     |
| 585 Interleukin 5                                          | IL5      |
| 586 TNF Receptor Associated Factor 6                       | TRAF6    |
| 587 TEK Receptor Tyrosine Kinase                           | TEK      |
| 588 Secretoglobin Family 1A Member 1                       | SCGB1A1  |
| 589 Cholinergic Receptor Nicotinic Alpha 3 Subunit         | CHRNA3   |
| 590 Cholinergic Receptor Nicotinic Alpha 5 Subunit         | CHRNA5   |
| 591 Glial Cell Derived Neurotrophic Factor                 | GDNF     |
| 592 Keratin 14                                             | KRT14    |
| 593 H2A Clustered Histone 18                               | H2AC18   |
| 594 Janus Kinase 1                                         | JAK1     |
| 595 CD9 Molecule                                           | CD9      |
| 596 Sirtuin 1                                              | SIRT1    |

|                                                                |         |
|----------------------------------------------------------------|---------|
| 597 Endothelial PAS Domain Protein 1                           | EPAS1   |
| 598 Cadherin 5                                                 | CDH5    |
| 599 Fibroblast Growth Factor 1                                 | FGF1    |
| 600 Mucin 5AC, Oligomeric Mucus/Gel-Forming                    | MUC5AC  |
| 601 Activated Leukocyte Cell Adhesion Molecule                 | ALCAM   |
| 602 Interleukin 18                                             | IL18    |
| 603 C-C Motif Chemokine Ligand 3                               | CCL3    |
| 604 Nuclear Receptor Subfamily 3 Group C Member 1              | NR3C1   |
| 605 Stathmin 1                                                 | STMN1   |
| 606 Thrombopoietin                                             | THPO    |
| 607 Aryl Hydrocarbon Receptor                                  | AHR     |
| 608 Serine/Threonine Kinase 4                                  | STK4    |
| 609 Matrix Metalloproteinase 13                                | MMP13   |
| 610 Dyskerin Pseudouridine Synthase 1                          | DKC1    |
| 611 Rho Associated Coiled-Coil Containing Protein Kinase 1     | ROCK1   |
| 612 Brain Derived Neurotrophic Factor                          | BDNF    |
| 613 Paired Box 8                                               | PAX8    |
| 614 Heat Shock Protein Family A (Hsp70) Member 8               | HSPA8   |
| 615 Cathepsin D                                                | CTSD    |
| 616 CD27 Molecule                                              | CD27    |
| 617 Granzyme B                                                 | GZMB    |
| 618 Transcription Factor AP-2 Alpha                            | TFAP2A  |
| 619 ERCC Excision Repair 5, Endonuclease                       | ERCC5   |
| 620 Protein Phosphatase 2 Scaffold Subunit Aalpha              | PPP2R1A |
| 621 Receptor For Activated C Kinase 1                          | RACK1   |
| 622 Signal Transducer And Activator Of Transcription 5A        | STAT5A  |
| 623 Annexin A1                                                 | ANXA1   |
| 624 Apoptotic Peptidase Activating Factor 1                    | APAF1   |
| 625 CEA Cell Adhesion Molecule 1                               | CEACAM1 |
| 626 Leucine Zipper Tumor Suppressor 1                          | LZTS1   |
| 627 C-X-C Motif Chemokine Ligand 10                            | CXCL10  |
| 628 Growth Differentiation Factor 15                           | GDF15   |
| 629 Apolipoprotein E                                           | APOE    |
| 630 CD3 Gamma Subunit Of T-Cell Receptor Complex               | CD3G    |
| 631 Fas Associated Via Death Domain                            | FADD    |
| 632 Protein Tyrosine Phosphatase Non-Receptor Type 12          | PTPN12  |
| 633 Lysine Demethylase 4C                                      | KDM4C   |
| 634 Interleukin 2 Receptor Subunit Beta                        | IL2RB   |
| 635 Reversion Inducing Cysteine Rich Protein With Kazal Motifs | RECK    |
| 636 C-X-C Motif Chemokine Receptor 3                           | CXCR3   |
| 637 Dual Specificity Phosphatase 1                             | DUSP1   |
| 638 Protein Kinase, DNA-Activated, Catalytic Subunit           | PRKDC   |
| 639 Wnt Family Member 5A                                       | WNT5A   |
| 640 Endothelin Receptor Type A                                 | EDNRA   |
| 641 Von Willebrand Factor                                      | VWF     |
| 642 Annexin A2                                                 | ANXA2   |

|                                                                 |          |
|-----------------------------------------------------------------|----------|
| 643 Mitogen-Activated Protein Kinase Kinase 4                   | MAP2K4   |
| 644 Cyclin H                                                    | CCNH     |
| 645 Neurotrophic Receptor Tyrosine Kinase 3                     | NTRK3    |
| 646 Phosphoinositide-3-Kinase Regulatory Subunit 2              | PIK3R2   |
| 647 Interleukin 6 Cytokine Family Signal Transducer             | IL6ST    |
| 648 Ubiquitin C-Terminal Hydrolase L1                           | UCHL1    |
| 649 Protein Kinase C Beta                                       | PRKCB    |
| 650 Tyrosine Kinase 2                                           | TYK2     |
| 651 CCAAT Enhancer Binding Protein Alpha                        | CEBPA    |
| 652 15-Hydroxyprostaglandin Dehydrogenase                       | HPGD     |
| 653 Suppressor Of Cytokine Signaling 1                          | SOCS1    |
| 654 PML Nuclear Body Scaffold                                   | PML      |
| 655 Solute Carrier Family 19 Member 1                           | SLC19A1  |
| 656 Transcription Factor Binding To IGHM Enhancer 3             | TFE3     |
| 657 Ras Homolog Family Member B                                 | RHOB     |
| 658 Arachidonate 5-Lipoxygenase                                 | ALOX5    |
| 659 ASXL Transcriptional Regulator 1                            | ASXL1    |
| 660 Deleted In Malignant Brain Tumors 1                         | DMBT1    |
| 661 Integrin Subunit Beta 2                                     | ITGB2    |
| 662 Splicing Factor 3b Subunit 1                                | SF3B1    |
| 663 Baculoviral IAP Repeat Containing 7                         | BIRC7    |
| 664 Transcription Factor 3                                      | TCF3     |
| 665 Nanog Homeobox                                              | NANOG    |
| 666 Prostaglandin E Receptor 4                                  | PTGER4   |
| 667 Diablo IAP-Binding Mitochondrial Protein                    | DIABLO   |
| 668 ERCC Excision Repair 3, TFIIH Core Complex Helicase Subunit | ERCC3    |
| 669 E2F Transcription Factor 2                                  | E2F2     |
| 670 Stromal Interaction Molecule 1                              | STIM1    |
| 671 UDP Glucuronosyltransferase Family 1 Member A1              | UGT1A1   |
| 672 C-X-C Motif Chemokine Receptor 5                            | CXCR5    |
| 673 CEA Cell Adhesion Molecule 7                                | CEACAM7  |
| 674 Major Histocompatibility Complex, Class I, C                | HLA-C    |
| 675 Epoxide Hydrolase 1                                         | EPHX1    |
| 676 CD3 Epsilon Subunit Of T-Cell Receptor Complex              | CD3E     |
| 677 Selectin E                                                  | SELE     |
| 678 GATA Binding Protein 6                                      | GATA6    |
| 679 EPH Receptor B4                                             | EPHB4    |
| 680 Exportin 1                                                  | XPO1     |
| 681 Laminin Subunit Beta 3                                      | LAMB3    |
| 682 Advanced Glycosylation End-Product Specific Receptor        | AGER     |
| 683 ETS Transcription Factor ERG                                | ERG      |
| 684 Lymphoid Enhancer Binding Factor 1                          | LEF1     |
| 685 Toll Like Receptor 3                                        | TLR3     |
| 686 Programmed Cell Death 1 Ligand 2                            | PDCD1LG2 |
| 687 Prostate Stem Cell Antigen                                  | PSCA     |
| 688 Erythropoietin Receptor                                     | EPOR     |

|                                                            |        |
|------------------------------------------------------------|--------|
| 689 MYCL Proto-Oncogene, BHLH Transcription Factor         | MYCL   |
| 690 Cyclin Dependent Kinase 5                              | CDK5   |
| 691 Caspase 1                                              | CASP1  |
| 692 Sphingomyelin Phosphodiesterase 1                      | SMPD1  |
| 693 Bone Morphogenetic Protein Receptor Type 2             | BMPR2  |
| 694 WEE1 G2 Checkpoint Kinase                              | WEE1   |
| 695 Fc Gamma Receptor IIa                                  | FCGR2A |
| 696 Sequestosome 1                                         | SQSTM1 |
| 697 Hyaluronan Binding Protein 2                           | HABP2  |
| 698 Catalase                                               | CAT    |
| 699 Dipeptidyl Peptidase 4                                 | DPP4   |
| 700 Deoxycytidine Kinase                                   | DCK    |
| 701 Pyruvate Kinase M1/2                                   | PKM    |
| 702 Transforming Growth Factor Beta 3                      | TGFB3  |
| 703 Nerve Growth Factor                                    | NGF    |
| 704 CD80 Molecule                                          | CD80   |
| 705 Catechol-O-Methyltransferase                           | COMT   |
| 706 Delta Like Non-Canonical Notch Ligand 1                | DLK1   |
| 707 Glial Fibrillary Acidic Protein                        | GFAP   |
| 708 Discoidin Domain Receptor Tyrosine Kinase 1            | DDR1   |
| 709 Caudal Type Homeobox 2                                 | CDX2   |
| 710 Coagulation Factor III, Tissue Factor                  | F3     |
| 711 Protein Kinase AMP-Activated Catalytic Subunit Alpha 1 | PRKAA1 |
| 712 Thrombomodulin                                         | THBD   |
| 713 Cyclin Dependent Kinase 12                             | CDK12  |
| 714 Nestin                                                 | NES    |
| 715 Cortactin                                              | CTTN   |
| 716 Hepatocyte Nuclear Factor 4 Alpha                      | HNF4A  |
| 717 Cell Division Cycle 6                                  | CDC6   |
| 718 TNF Receptor Associated Factor 2                       | TRAF2  |
| 719 Napsin A Aspartic Peptidase                            | NAPSA  |
| 720 Growth Factor Receptor Bound Protein 2                 | GRB2   |
| 721 Platelet Derived Growth Factor Subunit A               | PDGFA  |
| 722 Calcitonin Related Polypeptide Alpha                   | CALCA  |
| 723 CD22 Molecule                                          | CD22   |
| 724 Nth Like DNA Glycosylase 1                             | NTHL1  |
| 725 Cholecystokinin B Receptor                             | CCKBR  |
| 726 Filamin A                                              | FLNA   |
| 727 Histone Deacetylase 2                                  | HDAC2  |
| 728 Transcription Factor 7                                 | TCF7   |
| 729 Membrane Spanning 4-Domains A1                         | MS4A1  |
| 730 Forkhead Box E1                                        | FOXE1  |
| 731 Elastin                                                | ELN    |
| 732 Adrenoceptor Beta 2                                    | ADRB2  |
| 733 Integrin Subunit Alpha 2b                              | ITGA2B |
| 734 Signal Transducer And Activator Of Transcription 6     | STAT6  |



|                                                                         |         |
|-------------------------------------------------------------------------|---------|
| 735 Gastrin Releasing Peptide Receptor                                  | GRPR    |
| 736 Gastrin                                                             | GAST    |
| 737 Hydroxysteroid 17-Beta Dehydrogenase 1                              | HSD17B1 |
| 738 Inhibitor Of Nuclear Factor Kappa B Kinase Regulatory Subunit Gamma | IKBKG   |
| 739 Jagged Canonical Notch Ligand 1                                     | JAG1    |
| 740 Collagen Type XVIII Alpha 1 Chain                                   | COL18A1 |
| 741 Zinc Finger And BTB Domain Containing 16                            | ZBTB16  |
| 742 GATA Binding Protein 4                                              | GATA4   |
| 743 Ribosomal Protein SA                                                | RPSA    |
| 744 LYN Proto-Oncogene, Src Family Tyrosine Kinase                      | LYN     |
| 745 Sterol Regulatory Element Binding Transcription Factor 1            | SREBF1  |
| 746 Nuclear Receptor Corepressor 1                                      | NCOR1   |
| 747 Forkhead Box P1                                                     | FOXP1   |
| 748 Integrin Subunit Alpha M                                            | ITGAM   |
| 749 ATP Binding Cassette Subfamily C Member 3                           | ABCC3   |
| 750 MAGE Family Member A3                                               | MAGEA3  |
| 751 Integrin Subunit Beta 4                                             | ITGB4   |
| 752 NADH:Ubiquinone Oxidoreductase Subunit A13                          | NDUFA13 |
| 753 Heat Shock Transcription Factor 1                                   | HSF1    |
| 754 Sprouty RTK Signaling Antagonist 4                                  | SPRY4   |
| 755 ELAV Like RNA Binding Protein 1                                     | ELAVL1  |
| 756 Desmin                                                              | DES     |
| 757 Interferon Regulatory Factor 4                                      | IRF4    |
| 758 Matrix Metalloproteinase 12                                         | MMP12   |
| 759 SRY-Box Transcription Factor 4                                      | SOX4    |
| 760 Somatostatin Receptor 2                                             | SSTR2   |
| 761 RAB, Member Of RAS Oncogene Family Like 3                           | RABL3   |
| 762 BCAR1 Scaffold Protein, Cas Family Member                           | BCAR1   |
| 763 Roundabout Guidance Receptor 1                                      | ROBO1   |
| 764 Cyclin E2                                                           | CCNE2   |
| 765 Suppressor Of Cytokine Signaling 3                                  | SOCS3   |
| 766 Neurotrophic Receptor Tyrosine Kinase 2                             | NTRK2   |
| 767 Actin Beta                                                          | ACTB    |
| 768 Tripartite Motif Containing 28                                      | TRIM28  |
| 769 FA Complement Group A                                               | FANCA   |
| 770 Myosin Light Chain Kinase                                           | MYLK    |
| 771 Phosphoinositide-3-Kinase Regulatory Subunit 3                      | PIK3R3  |
| 772 Paired Box 6                                                        | PAX6    |
| 773 Thyroglobulin                                                       | TG      |
| 774 Transcription Factor 4                                              | TCF4    |
| 775 Interleukin 12B                                                     | IL12B   |
| 776 Interleukin 24                                                      | IL24    |
| 777 Semaphorin 3B                                                       | SEMA3B  |
| 778 Eukaryotic Translation Initiation Factor 2 Alpha Kinase 2           | EIF2AK2 |
| 779 CD81 Molecule                                                       | CD81    |
| 780 Insulin Like Growth Factor Binding Protein 2                        | IGFBP2  |

|                                                       |         |
|-------------------------------------------------------|---------|
| 781 Heparin Binding EGF Like Growth Factor            | HBEGF   |
| 782 RELB Proto-Oncogene, NF-KB Subunit                | RELB    |
| 783 ATRX Chromatin Remodeler                          | ATRX    |
| 784 Tight Junction Protein 1                          | TJP1    |
| 785 Wnt Family Member 4                               | WNT4    |
| 786 Retinoid X Receptor Beta                          | RXRΒ    |
| 787 Protein Tyrosine Phosphatase Non-Receptor Type 13 | PTPN13  |
| 788 Calbindin 2                                       | CALB2   |
| 789 LIF Interleukin 6 Family Cytokine                 | LIF     |
| 790 C-C Motif Chemokine Receptor 3                    | CCR3    |
| 791 C-C Motif Chemokine Ligand 11                     | CCL11   |
| 792 BPI Fold Containing Family A Member 1             | BPIFA1  |
| 793 P21 (RAC1) Activated Kinase 1                     | PAK1    |
| 794 Selectin P                                        | SELP    |
| 795 S-Phase Kinase Associated Protein 1               | SKP1    |
| 796 MAGE Family Member A4                             | MAGEA4  |
| 797 Rac Family Small GTPase 2                         | RAC2    |
| 798 RNA Binding Motif Protein 6                       | RBM6    |
| 799 Cytochrome P450 Family 17 Subfamily A Member 1    | CYP17A1 |
| 800 ADAM Metallopeptidase Domain 12                   | ADAM12  |
| 801 CD86 Molecule                                     | CD86    |
| 802 Actin Alpha Cardiac Muscle 1                      | ACTC1   |
| 803 Nuclear Receptor Coactivator 3                    | NCOA3   |
| 804 Coagulation Factor II, Thrombin                   | F2      |
| 805 Dickkopf WNT Signaling Pathway Inhibitor 1        | DKK1    |
| 806 BAG Cochaperone 1                                 | BAG1    |
| 807 Ribonucleotide Reductase Regulatory Subunit M2    | RRM2    |
| 808 Peroxiredoxin 1                                   | PRDX1   |
| 809 Interferon Alpha 2                                | IFNA2   |
| 810 Purinergic Receptor P2X 7                         | P2RX7   |
| 811 B Cell Linker                                     | BLNK    |
| 812 Caspase 2                                         | CASP2   |
| 813 Interleukin 11                                    | IL11    |
| 814 S100 Calcium Binding Protein B                    | S100B   |
| 815 Laminin Subunit Alpha 5                           | LAMA5   |
| 816 Adiponectin, C1Q And Collagen Domain Containing   | ADIPOQ  |
| 817 Erythrocyte Membrane Protein Band 4.1 Like 3      | EPB41L3 |
| 818 Transcriptional And Immune Response Regulator     | TCIM    |
| 819 MDM4 Regulator Of P53                             | MDM4    |
| 820 Leptin Receptor                                   | LEPR    |
| 821 TNF Receptor Associated Factor 3                  | TRAF3   |
| 822 WNT Inhibitory Factor 1                           | WIF1    |
| 823 CCAAT Enhancer Binding Protein Beta               | CEBPB   |
| 824 Nectin Cell Adhesion Molecule 4                   | NECTIN4 |
| 825 Ceruloplasmin                                     | CP      |
| 826 C-X-C Motif Chemokine Ligand 1                    | CXCL1   |

|                                                           |           |
|-----------------------------------------------------------|-----------|
| 827 C-X-C Motif Chemokine Receptor 1                      | CXCR1     |
| 828 CXADR Ig-Like Cell Adhesion Molecule                  | CXADR     |
| 829 Recoverin                                             | RCVRN     |
| 830 Gelsolin                                              | GSN       |
| 831 Indoleamine 2,3-Dioxygenase 1                         | IDO1      |
| 832 Phospholipase C Gamma 2                               | PLCG2     |
| 833 Phosphatidylethanolamine Binding Protein 1            | PEBP1     |
| 834 Cyclin A1                                             | CCNA1     |
| 835 TNF Receptor Superfamily Member 10d                   | TNFRSF10D |
| 836 Thymidine Kinase 1                                    | TK1       |
| 837 Myosin XVIIIIB                                        | MYO18B    |
| 838 S100 Calcium Binding Protein A2                       | S100A2    |
| 839 N-Myc Downstream Regulated 1                          | NDRG1     |
| 840 CD55 Molecule (Cromer Blood Group)                    | CD55      |
| 841 Cathepsin L                                           | CTSL      |
| 842 Protein Kinase CAMP-Activated Catalytic Subunit Alpha | PRKACA    |
| 843 Mesothelin                                            | MSLN      |
| 844 Wnt Family Member 1                                   | WNT1      |
| 845 Protein Kinase C Epsilon                              | PRKCE     |
| 846 Collagen Type IV Alpha 3 Chain                        | COL4A3    |
| 847 Prolactin                                             | PRL       |
| 848 Nuclear Mitotic Apparatus Protein 1                   | NUMA1     |
| 849 CD63 Molecule                                         | CD63      |
| 850 Lymphotoxin Alpha                                     | LTA       |
| 851 Fli-1 Proto-Oncogene, ETS Transcription Factor        | FLI1      |
| 852 TNF Receptor Associated Factor 1                      | TRAF1     |
| 853 Casein Kinase 1 Alpha 1                               | CSNK1A1   |
| 854 Bone Gamma-Carboxyglutamate Protein                   | BGLAP     |
| 855 Glutathione S-Transferase Mu 3                        | GSTM3     |
| 856 Metadherin                                            | MTDH      |
| 857 GLI Family Zinc Finger 2                              | GLI2      |
| 858 Toll Like Receptor 5                                  | TLR5      |
| 859 L1 Cell Adhesion Molecule                             | L1CAM     |
| 860 DEAD-Box Helicase 5                                   | DDX5      |
| 861 Kruppel Like Factor 5                                 | KLF5      |
| 862 Integrin Subunit Alpha L                              | ITGAL     |
| 863 MAGE Family Member A1                                 | MAGEA1    |
| 864 FA Complementatation Group G                          | FANCG     |
| 865 Lactate Dehydrogenase A                               | LDHA      |
| 866 Cytochrome P450 Family 1 Subfamily A Member 2         | CYP1A2    |
| 867 Lysine Methyltransferase 2A                           | KMT2A     |
| 868 Exonuclease 1                                         | EXO1      |
| 869 Melanoma Cell Adhesion Molecule                       | MCAM      |
| 870 Macrophage Stimulating 1 Receptor                     | MST1R     |
| 871 Laminin Subunit Alpha 1                               | LAMA1     |
| 872 Ryanodine Receptor 1                                  | RYR1      |

|                                                                       |          |
|-----------------------------------------------------------------------|----------|
| 873 Cadherin 3                                                        | CDH3     |
| 874 Dipeptidyl Peptidase 9                                            | DPP9     |
| 875 Leucine Zipper Like Transcription Regulator 1                     | LZTR1    |
| 876 Minichromosome Maintenance Complex Component 3                    | MCM3     |
| 877 Laminin Subunit Gamma 1                                           | LAMC1    |
| 878 PR/SET Domain 14                                                  | PRDM14   |
| 879 Cell Division Cycle 20                                            | CDC20    |
| 880 Fatty Acid Binding Protein 4                                      | FABP4    |
| 881 Interleukin 1 Receptor Type 1                                     | IL1R1    |
| 882 Cancer/Testis Antigen 2                                           | CTAG2    |
| 883 TPX2 Microtubule Nucleation Factor                                | TPX2     |
| 884 Class II Major Histocompatibility Complex Transactivator          | CIITA    |
| 885 Gap Junction Protein Beta 2                                       | GJB2     |
| 886 Nicotinamide N-Methyltransferase                                  | NNMT     |
| 887 G Protein-Coupled Estrogen Receptor 1                             | GPER1    |
| 888 IKAROS Family Zinc Finger 3                                       | IKZF3    |
| 889 Proopiomelanocortin                                               | POMC     |
| 890 Mitogen-Activated Protein Kinase 10                               | MAPK10   |
| 891 RecQ Like Helicase                                                | RECQL    |
| 892 Secreted Frizzled Related Protein 1                               | SFRP1    |
| 893 Ubiquitin Specific Peptidase 8                                    | USP8     |
| 894 Neural Precursor Cell Expressed, Developmentally Down-Regulated 9 | NEDD9    |
| 895 Protein Tyrosine Phosphatase Non-Receptor Type 22                 | PTPN22   |
| 896 Wnt Family Member 3                                               | WNT3     |
| 897 Granulin Precursor                                                | GRN      |
| 898 V-Set Domain Containing T Cell Activation Inhibitor 1             | VTCN1    |
| 899 Interferon Regulatory Factor 8                                    | IRF8     |
| 900 Galactosylceramidase                                              | GALC     |
| 901 Coagulation Factor II Thrombin Receptor                           | F2R      |
| 902 HOP Homeobox                                                      | HOPX     |
| 903 Arginyl-TRNA Synthetase 1                                         | RARS1    |
| 904 Serpin Family B Member 3                                          | SERPINB3 |
| 905 Forkhead Box A1                                                   | FOXA1    |
| 906 DEAD-Box Helicase 3 X-Linked                                      | DDX3X    |
| 907 RE1 Silencing Transcription Factor                                | REST     |
| 908 Protein Phosphatase 2 Regulatory Subunit Balpha                   | PPP2R2A  |
| 909 C-C Motif Chemokine Ligand 4                                      | CCL4     |
| 910 3-Phosphoinositide Dependent Protein Kinase 1                     | PDPK1    |
| 911 Ornithine Decarboxylase 1                                         | ODC1     |
| 912 Serine And Arginine Rich Splicing Factor 2                        | SRSF2    |
| 913 Spermidine/Spermine N1-Acetyltransferase 1                        | SAT1     |
| 914 Cancer/Testis Antigen 83                                          | CT83     |
| 915 Microtubule Associated Protein Tau                                | MAPT     |
| 916 Metastasis Associated 1                                           | MTA1     |
| 917 G Protein-Coupled Receptor Class C Group 5 Member A               | GPRC5A   |
| 918 Lamin B Receptor                                                  | LBR      |

|                                                                       |           |
|-----------------------------------------------------------------------|-----------|
| 919 Interleukin 12A                                                   | IL12A     |
| 920 Acetylcholinesterase (Cartwright Blood Group)                     | ACHE      |
| 921 Nuclear Receptor Subfamily 1 Group H Member 2                     | NR1H2     |
| 922 FUS RNA Binding Protein                                           | FUS       |
| 923 TNF Receptor Associated Factor 4                                  | TRAF4     |
| 924 Activin A Receptor Like Type 1                                    | ACVRL1    |
| 925 CD226 Molecule                                                    | CD226     |
| 926 H2A.X Variant Histone                                             | H2AX      |
| 927 Bromodomain Containing 4                                          | BRD4      |
| 928 Heterogeneous Nuclear Ribonucleoprotein A2/B1                     | HNRNPA2B1 |
| 929 Tissue Factor Pathway Inhibitor 2                                 | TFPI2     |
| 930 Signal Peptide, CUB Domain And EGF Like Domain Containing 3       | SCUBE3    |
| 931 Bone Morphogenetic Protein 7                                      | BMP7      |
| 932 CD209 Molecule                                                    | CD209     |
| 933 Fibrinogen Alpha Chain                                            | FGA       |
| 934 Wnt Family Member 7B                                              | WNT7B     |
| 935 TNF Alpha Induced Protein 3                                       | TNFAIP3   |
| 936 Selectin L                                                        | SELL      |
| 937 ADAM Metallopeptidase Domain 17                                   | ADAM17    |
| 938 Eukaryotic Translation Initiation Factor 4E Binding Protein 1     | EIF4EBP1  |
| 939 Killer Cell Immunoglobulin Like Receptor, Three Ig Domains And Lo | KIR3DL1   |
| 940 Ras Association Domain Family Member 5                            | RASSF5    |
| 941 GLI Family Zinc Finger 3                                          | GLI3      |
| 942 Methylthioadenosine Phosphorylase                                 | MTAP      |
| 943 CD82 Molecule                                                     | CD82      |
| 944 CD47 Molecule                                                     | CD47      |
| 945 CD2 Molecule                                                      | CD2       |
| 946 TTK Protein Kinase                                                | TTK       |
| 947 Plasminogen                                                       | PLG       |
| 948 Succinate Dehydrogenase Complex Assembly Factor 2                 | SDHAF2    |
| 949 Pyruvate Dehydrogenase Kinase 1                                   | PDK1      |
| 950 Casein Kinase 2 Alpha 1                                           | CSNK2A1   |
| 951 Trefoil Factor 1                                                  | TFF1      |
| 952 Interleukin 12 Receptor Subunit Beta 1                            | IL12RB1   |
| 953 Sirtuin 3                                                         | SIRT3     |
| 954 NLR Family Pyrin Domain Containing 3                              | NLRP3     |
| 955 TNF Receptor Superfamily Member 11a                               | TNFRSF11A |
| 956 Integrin Subunit Alpha E                                          | ITGAE     |
| 957 X-Box Binding Protein 1                                           | XBP1      |
| 958 Moesin                                                            | MSN       |
| 959 Collagen Type IV Alpha 2 Chain                                    | COL4A2    |
| 960 Apoptosis Inducing Factor Mitochondria Associated 1               | AIFM1     |
| 961 Transcription Factor EB                                           | TFEB      |
| 962 Ectonucleotide Pyrophosphatase/Phosphodiesterase 2                | ENPP2     |
| 963 BAF Chromatin Remodeling Complex Subunit BCL11A                   | BCL11A    |
| 964 Interleukin 9                                                     | IL9       |

|                                                         |          |
|---------------------------------------------------------|----------|
| 965 DNA Damage Inducible Transcript 3                   | DDIT3    |
| 966 Prostaglandin-Endoperoxide Synthase 1               | PTGS1    |
| 967 Amyloid Beta Precursor Protein                      | APP      |
| 968 Sphingosine Kinase 1                                | SPHK1    |
| 969 Protein Tyrosine Phosphatase Non-Receptor Type 1    | PTPN1    |
| 970 Pim-1 Proto-Oncogene, Serine/Threonine Kinase       | PIM1     |
| 971 5'-Nucleotidase Ecto                                | NT5E     |
| 972 Nerve Growth Factor Receptor                        | NGFR     |
| 973 Transglutaminase 2                                  | TGM2     |
| 974 SIX Homeobox 1                                      | SIX1     |
| 975 Timeless Circadian Regulator                        | TIMELESS |
| 976 Linker For Activation Of T Cells                    | LAT      |
| 977 Vitronectin                                         | VTN      |
| 978 LDL Receptor Related Protein 1B                     | LRP1B    |
| 979 Acid Phosphatase 5, Tartrate Resistant              | ACP5     |
| 980 Transmembrane Serine Protease 2                     | TMPRSS2  |
| 981 Tumor Suppressor 2, Mitochondrial Calcium Regulator | TUSC2    |
| 982 ADAM Metallopeptidase Domain 15                     | ADAM15   |
| 983 Killer Cell Lectin Like Receptor C1                 | KLRC1    |
| 984 Microtubule Associated Scaffold Protein 1           | MTUS1    |
| 985 LIM Domain Containing 1                             | LIMD1    |
| 986 Cell Division Cycle 25B                             | CDC25B   |
| 987 Chitinase 3 Like 1                                  | CHI3L1   |
| 988 Nodal Growth Differentiation Factor                 | NODAL    |
| 989 Cell Adhesion Molecule L1 Like                      | CHL1     |
| 990 C-C Motif Chemokine Receptor 1                      | CCR1     |
| 991 Glutamate-Cysteine Ligase Catalytic Subunit         | GCLC     |
| 992 S100 Calcium Binding Protein A9                     | S100A9   |
| 993 CD46 Molecule                                       | CD46     |
| 994 Iron Responsive Element Binding Protein 2           | IREB2    |
| 995 Forkhead Box F1                                     | FOXF1    |
| 996 Ribosomal Oxygenase 2                               | RIOX2    |
| 997 Insulin Receptor Substrate 2                        | IRS2     |
| 998 Histone Deacetylase 4                               | HDAC4    |
| 999 protein phosphatase 1 regulatory subunit 12C        | PPP1R12C |
| 1000 Cas scaffold protein family member 4               | CASS4    |
| 1001 proline rich protein HaeIII subfamily 1            | PRH1     |
| 1002 proline rich protein HaeIII subfamily 2            | PRH2     |
| 1003 mucolipin 1                                        | MCOLN1   |
| 1004 prohibitin                                         | PHB      |
| 1005 myocardial infarction associated transcript        | MIAT     |
| 1006 matrix metallopeptidase 19                         | MMP19    |
| 1007 midkine                                            | MDK      |
| 1008 cyclin dependent kinase 14                         | CDK14    |
| 1009 SIX homeobox 4                                     | SIX4     |
| 1010 NADPH oxidase 4                                    | NOX4     |

|                                                                  |          |
|------------------------------------------------------------------|----------|
| 1011 zinc finger SWIM-type containing 5                          | ZSWIM5   |
| 1012 chondroitin polymerizing factor                             | CHPF     |
| 1013 Cbl proto-oncogene like 1                                   | CBLL1    |
| 1014 LIM domain containing 2                                     | LIMD2    |
| 1015 VANGL planar cell polarity protein 1                        | VANGL1   |
| 1016 forkhead box N1                                             | FOXN1    |
| 1017 interferon induced transmembrane protein 1                  | IFITM1   |
| 1018 Rho guanine nucleotide exchange factor 7                    | ARHGEF7  |
| 1019 CBFA2/RUNX1 partner transcriptional co-repressor 2          | CBFA2T2  |
| 1020 Pvt1 oncogene                                               | PVT1     |
| 1021 pyrroline-5-carboxylate reductase 1                         | PYCR1    |
| 1022 golgi phosphoprotein 3                                      | GOLPH3   |
| 1023 SOS Ras/Rho guanine nucleotide exchange factor 2            | SOS2     |
| 1024 tetraspanin 7                                               | TSPAN7   |
| 1025 thymopoietin                                                | TMPO     |
| 1026 lon peptidase 1, mitochondrial                              | LONP1    |
| 1027 family with sequence similarity 83 member F                 | FAM83F   |
| 1028 ankyrin repeat domain 22                                    | ANKRD22  |
| 1029 cytochrome P450 family 2 subfamily C member 9               | CYP2C9   |
| 1030 death associated protein                                    | DAP      |
| 1031 decorin                                                     | DCN      |
| 1032 RAD52 motif containing 1                                    | RDM1     |
| 1033 ETS variant transcription factor 4                          | ETV4     |
| 1034 hepatic and glial cell adhesion molecule                    | HEPACAM  |
| 1035 fibroblast growth factor 9                                  | FGF9     |
| 1036 cholinergic receptor nicotinic alpha 4 subunit              | CHRNA4   |
| 1037 CD300a molecule                                             | CD300A   |
| 1038 TOP1 binding arginine/serine rich protein                   | TOPORS   |
| 1039 flotillin 1                                                 | FLOT1    |
| 1040 deleted in lymphocytic leukemia 1                           | DLEU1    |
| 1041 Kruppel like factor 2                                       | KLF2     |
| 1042 late endosomal/lysosomal adaptor, MAPK and MTOR activator 5 | LAMTOR5  |
| 1043 C-X-C motif chemokine ligand 13                             | CXCL13   |
| 1044 CUGBP Elav-like family member 1                             | CELF1    |
| 1045 leukocyte immunoglobulin like receptor B1                   | LILRB1   |
| 1046 KCNQ1 opposite strand/antisense transcript 1                | KCNQ1OT1 |
| 1047 ubiquitin conjugating enzyme E2 C                           | UBE2C    |
| 1048 protein phosphatase 1 regulatory subunit 13B                | PPP1R13B |
| 1049 interleukin 12 receptor subunit beta 2                      | IL12RB2  |
| 1050 interleukin enhancer binding factor 2                       | ILF2     |
| 1051 opioid growth factor receptor pseudogene 1                  | OGFRP1   |
| 1052 GA binding protein transcription factor subunit alpha       | GABPA    |
| 1053 prostate androgen-regulated transcript 1                    | PART1    |
| 1054 chromodomain helicase DNA binding protein 5                 | CHD5     |
| 1055 large tumor suppressor kinase 2                             | LATS2    |
| 1056 nuclear paraspeckle assembly transcript 1                   | NEAT1    |

|                                                                 |         |
|-----------------------------------------------------------------|---------|
| 1057 HIC ZBTB transcriptional repressor 1                       | HIC1    |
| 1058 homeobox A11                                               | HOXA11  |
| 1059 homeobox B5                                                | HOXB5   |
| 1060 Bile salt export pump                                      | ABCB11  |
| 1061 Cholinesterase                                             | BCHE    |
| 1062 Cocaine esterase                                           | CES2    |
| 1063 Cytochrome P450 2B6                                        | CYP2B6  |
| 1064 Cytochrome P450 2C8                                        | CYP2C8  |
| 1065 Cytochrome P450 3A5                                        | CYP3A5  |
| 1066 Cytochrome P450 3A7                                        | CYP3A7  |
| 1067 Cytosolic phospholipase A2                                 | PLA2G4A |
| 1068 DNA topoisomerase 2-beta                                   | TOP2B   |
| 1069 DNA topoisomerase I, mitochondrial                         | TOP1MT  |
| 1070 Liver carboxylesterase 1                                   | CES1    |
| 1071 Microtubule-associated protein 2                           | MAP2    |
| 1072 Microtubule-associated protein 4                           | MAP4    |
| 1073 Multidrug resistance-associated protein 6                  | ABCC6   |
| 1074 Multidrug resistance-associated protein 7                  | ABCC10  |
| 1075 NADPH--cytochrome P450 reductase                           | POR     |
| 1076 Nuclear receptor subfamily 1 group I member 2              | NR1I2   |
| 1077 Solute carrier family 22 member 1                          | SLC22A1 |
| 1078 Solute carrier family 22 member 3                          | SLC22A3 |
| 1079 Solute carrier organic anion transporter family member 1B1 | SLCO1B1 |
| 1080 Solute carrier organic anion transporter family member 1B3 | SLCO1B3 |
| 1081 Tubulin alpha-1A chain                                     | TUBA1A  |
| 1082 Tubulin beta-1 chain                                       | TUBB1   |
| 1083 Tubulin delta chain                                        | TUBD1   |
| 1084 Tubulin epsilon chain                                      | TUBE1   |
| 1085 Tubulin gamma-1 chain                                      | TUBG1   |
| 1086 UDP-glucuronosyltransferase 1-9                            | UGT1A9  |
| 1087 UDP-glucuronosyltransferase 2B7                            | UGT2B7  |

---
