# Supplementary material for: Integrating Network Pharmacology and Experimental Validation to Elucidate the Mechanism of Yiqi Yangyin Decoction in Suppressing Non‐Small‐Cell Lung Cancer
Source: Hindawi journal article supplement (doi:10.1155/2023/4967544), 2023-01-01
Supplement: f4 [file 4967544.f4.pdf]

**Supplementay Table 3: The overlapping genes for compound targets and NSCLC-related targets**

| <b>Number</b> | <b>Protein name</b>                                                             | <b>Gene name</b> |
|---------------|---------------------------------------------------------------------------------|------------------|
| 1             | Progesterone receptor                                                           | PGR              |
| 2             | Prostaglandin G/H synthase 1                                                    | PTGS1            |
| 3             | Prostaglandin G/H synthase 2                                                    | PTGS2            |
| 4             | Heat shock protein HSP 90                                                       | HSP90AA1         |
| 5             | Phosphatidylinositol-4,5-bisphosphate 3-kinase catalytic subunit, gamma isoform | PIK3CG           |
| 6             | mRNA of PKA Catalytic Subunit C-alpha                                           | PRKACA           |
| 7             | Beta-2 adrenergic receptor                                                      | ADRB2            |
| 8             | Apoptosis regulator Bcl-2                                                       | BCL2             |
| 9             | Apoptosis regulator BAX                                                         | BAX              |
| 10            | Caspase-9                                                                       | CASP9            |
| 11            | Transcription factor AP-1                                                       | JUN              |
| 12            | Caspase-3                                                                       | CASP3            |
| 13            | Caspase-8                                                                       | CASP8            |
| 14            | Protein kinase C alpha type                                                     | PRKCA            |
| 15            | Transforming growth factor beta-1                                               | TGFB1            |
| 16            | Microtubule-associated protein 2                                                | MAP2             |
| 17            | Androgen receptor                                                               | AR               |
| 18            | Cytochrome P450 17A1                                                            | CYP17A1          |
| 19            | Estrogen receptor                                                               | ESR1             |
| 20            | Aromatase                                                                       | CYP19A1          |
| 21            | Estrogen receptor beta                                                          | ESR2             |
| 22            | Glucocorticoid receptor                                                         | NR3C1            |
| 23            | M-phase inducer phosphatase 2                                                   | CDC25B           |
| 24            | Acetylcholinesterase                                                            | ACHE             |
| 25            | Bone morphogenetic protein 2                                                    | BMP2             |
| 26            | Proto-oncogene serine/threonine-protein kinase Pim-1                            | PIM1             |
| 27            | Serum albumin                                                                   | ALB              |
| 28            | Estradiol 17-beta-dehydrogenase 1                                               | HSD17B1          |
| 29            | Caspase-7                                                                       | CASP7            |
| 30            | Mitogen-activated protein kinase 1                                              | MAPK1            |
| 31            | Collagenase 3                                                                   | MMP13            |
| 32            | Prothrombin                                                                     | F2               |
| 33            | Vascular endothelial growth factor receptor 2                                   | KDR              |
| 34            | Peroxisome proliferator-activated receptor gamma                                | PPARG            |
| 35            | Cell division protein kinase 2                                                  | CDK2             |
| 36            | Mitogen-activated protein kinase 14                                             | MAPK14           |
| 37            | Mitogen-activated protein kinase 8                                              | MAPK8            |
| 38            | Nitric oxide synthase, endothelial                                              | NOS3             |
| 39            | Epidermal growth factor receptor                                                | EGFR             |
| 40            | ADAM 17                                                                         | ADAM17           |
| 41            | Annexin A5                                                                      | ANXA5            |
| 42            | Proto-oncogene tyrosine-protein kinase Src                                      | SRC              |

|                                                                  |         |
|------------------------------------------------------------------|---------|
| 43 3-phosphoinositide-dependent protein kinase 1                 | PDPK1   |
| 44 Tyrosine-protein phosphatase non-receptor type 11             | PTPN11  |
| 45 Liver carboxylesterase 1                                      | CES1    |
| 46 Serine/threonine-protein kinase Chk1                          | CHEK1   |
| 47 TGF-beta receptor type-1                                      | TGFBR1  |
| 48 Integrin alpha-L                                              | ITGAL   |
| 49 Arachidonate 5-lipoxygenase                                   | ALOX5   |
| 50 Phospholipase A2, membrane associated                         | PLA2G2A |
| 51 Histone deacetylase 4                                         | HDAC4   |
| 52 Cocaine esterase                                              | CES2    |
| 53 Toll-like receptor 9                                          | TLR9    |
| 54 Histone deacetylase 2                                         | HDAC2   |
| 55 Macrophage migration inhibitory factor                        | MIF     |
| 56 Retinoic acid receptor beta                                   | RARB    |
| 57 Aryl hydrocarbon receptor                                     | AHR     |
| 58 Glutathione S-transferase P                                   | GSTP1   |
| 59 Ephrin type-B receptor 4                                      | EPHB4   |
| 60 Mitogen-activated protein kinase 10                           | MAPK10  |
| 61 Cholinesterase                                                | BCHE    |
| 62 Cyclin-A2                                                     | CCNA2   |
| 63 B-Raf proto-oncogene serine/threonine-protein kinase          | BRAF    |
| 64 Insulin-like growth factor 1 receptor                         | IGF1R   |
| 65 Proto-oncogene tyrosine-protein kinase LCK                    | LCK     |
| 66 Retinoic acid receptor RXR-alpha                              | RXRA    |
| 67 NAD(P)H dehydrogenase [quinone] 1                             | NQO1    |
| 68 Thymidylate synthase                                          | TYMS    |
| 69 Cathepsin B                                                   | CTSB    |
| 70 Prostaglandin E2 receptor EP4 subtype                         | PTGER4  |
| 71 Tyrosine-protein phosphatase non-receptor type 22             | PTPN22  |
| 72 Stromelysin-1                                                 | MMP3    |
| 73 Oxysterols receptor LXR-beta                                  | NR1H2   |
| 74 Dipeptidyl peptidase IV                                       | DPP4    |
| 75 Tyrosine-protein phosphatase non-receptor type 1              | PTPN1   |
| 76 DNA (cytosine-5)-methyltransferase 1                          | DNMT1   |
| 77 Heat shock cognate 71 kDa protein                             | HSPA8   |
| 78 Nitric oxide synthase, inducible                              | NOS2    |
| 79 DNA topoisomerase II                                          | TOP2A   |
| 80 Transcription factor p65                                      | RELA    |
| 81 Inhibitor of nuclear factor kappa-B kinase subunit beta       | IKBKB   |
| 82 RAC-alpha serine/threonine-protein kinase                     | AKT1    |
| 83 Tumor necrosis factor                                         | TNF     |
| 84 Interstitial collagenase                                      | MMP1    |
| 85 Signal transducer and activator of transcription 1-alpha/beta | STAT1   |
| 86 Cell division control protein 2 homolog                       | CDK1    |
| 87 Heme oxygenase 1                                              | HMOX1   |
| 88 Cytochrome P450 3A4                                           | CYP3A4  |

|                                                  |        |
|--------------------------------------------------|--------|
| 89 Cytochrome P450 1A2                           | CYP1A2 |
| 90 Cytochrome P450 1A1                           | CYP1A1 |
| 91 Intercellular adhesion molecule 1             | ICAM1  |
| 92 E-selectin                                    | SELE   |
| 93 Nuclear receptor subfamily 1 group I member 2 | NR1I2  |
| 94 Cytochrome P450 1B1                           | CYP1B1 |
| 95 Insulin receptor                              | INSR   |
| 96 Glutathione S-transferase Mu 1                | GSTM1  |
| 97 NADPH oxidase 4                               | NOX4   |
| 98 Tyrosine-protein kinase receptor FLT3         | FLT3   |
| 99 Multidrug resistance-associated protein 1     | ABCC1  |
| 100 P-glycoprotein 1                             | ABCB1  |
| 101 ATP-binding cassette sub-family G member 2   | ABCG2  |
| 102 Tyrosine-protein kinase SYK                  | SYK    |
| 103 Glycogen synthase kinase-3 beta              | GSK3B  |
| 104 Matrix metalloproteinase 9                   | MMP9   |
| 105 Matrix metalloproteinase 2                   | MMP2   |
| 106 Cyclin-dependent kinase 5                    | CDK5   |
| 107 cyclin B1                                    | CCNB1  |
| 108 Death-associated protein kinase 1            | DAPK1  |
| 109 Receptor-type tyrosine-protein phosphatase C | PTPRC  |
| 110 1                                            | MCL1   |
| 111 Telomerase reverse transcriptase             | TERT   |
| 112 Carbonic anhydrase 9                         | CA9    |
| 113 Tubulin alpha-1A chain                       | TUBA1A |
| 114 Hepatocyte nuclear factor 4-alpha            | HNF4A  |
| 115 Ras-related C3 botulinum toxin substrate 1   | RAC1   |
| 116 Cytochrome P450 2C9                          | CYP2C9 |
| 117 Protein kinase C epsilon type                | PRKCE  |
| 118 Amyloid beta A4 protein                      | APP    |
| 119 Cell division protein kinase 6               | CDK6   |
| 120 Dihydrofolate reductase                      | DHFR   |
| 121 Serine/threonine-protein kinase 6            | AURKA  |
| 122 Vascular endothelial growth factor A         | VEGFA  |
| 123 Estrogen receptor                            | CCND1  |
| 124 Bcl-2-like protein 1                         | BCL2L1 |
| 125 Cyclin-dependent kinase inhibitor 1          | CDKN1A |
| 126 Interleukin-10                               | IL10   |
| 127 Retinoblastoma-associated protein            | RB1    |
| 128 Cell division protein kinase 4               | CDK4   |
| 129 Interleukin-6                                | IL6    |
| 130 Cellular tumor antigen p53                   | TP53   |
| 131 NF-kappa-B inhibitor alpha                   | NFKBIA |
| 132 DNA topoisomerase 1                          | TOP1   |
| 133 E3 ubiquitin-protein ligase Mdm2             | MDM2   |
| 134 Proliferating cell nuclear antigen           | PCNA   |

|     |                                                                                                      |          |
|-----|------------------------------------------------------------------------------------------------------|----------|
| 135 | Receptor tyrosine-protein kinase erbB-2                                                              | ERBB2    |
| 136 | Baculoviral IAP repeat-containing protein 5                                                          | BIRC5    |
| 137 | Interleukin-2                                                                                        | IL2      |
| 138 | Interferon gamma                                                                                     | IFNG     |
| 139 | Interleukin-4                                                                                        | IL4      |
| 140 | CD40 ligand                                                                                          | CD40LG   |
| 141 | Hepatocyte growth factor receptor                                                                    | MET      |
| 142 | Poly [ADP-ribose] polymerase 1                                                                       | PARP1    |
| 143 | Macrophage metalloelastase                                                                           | MMP12    |
| 144 | Cathepsin D                                                                                          | CTSD     |
| 145 | Proto-oncogene c-Fos                                                                                 | FOS      |
| 146 | Urokinase-type plasminogen activator                                                                 | PLAU     |
| 147 | Pro-epidermal growth factor                                                                          | EGF      |
| 148 | Cyclin-dependent kinase inhibitor 2A, isoforms 1/2/3                                                 | CDKN2A   |
| 149 | NADPH--cytochrome P450 reductase                                                                     | POR      |
| 150 | Ornithine decarboxylase                                                                              | ODC1     |
| 151 | RAF proto-oncogene serine/threonine-protein kinase                                                   | RAF1     |
| 152 | Superoxide dismutase [Cu-Zn]                                                                         | SOD1     |
| 153 | Hypoxia-inducible factor 1-alpha                                                                     | HIF1A    |
| 154 | 78 kDa glucose-regulated protein                                                                     | HSPA5    |
| 155 | Caveolin-1                                                                                           | CAV1     |
| 156 | Myc proto-oncogene protein                                                                           | MYC      |
| 157 | Tissue factor                                                                                        | F3       |
| 158 | Gap junction alpha-1 protein                                                                         | GJA1     |
| 159 | Interleukin-1 beta                                                                                   | IL1B     |
| 160 | C-C motif chemokine 2                                                                                | CCL2     |
| 161 | Interleukin-8                                                                                        | CXCL8    |
| 162 | Protein kinase C beta type                                                                           | PRKCB    |
| 163 | Heat shock protein beta-1                                                                            | HSPB1    |
| 164 | Thrombomodulin                                                                                       | THBD     |
| 165 | Plasminogen activator inhibitor 1                                                                    | SERPINE1 |
| 166 | Collagen alpha-1(I) chain                                                                            | COL1A1   |
| 167 | Phosphatidylinositol-3,4,5-trisphosphate 3-phosphatase and dual-specificity protein phosphatase PTEN | PTEN     |
| 168 | Interleukin-1 alpha                                                                                  | IL1A     |
| 169 | Myeloperoxidase                                                                                      | MPO      |
| 170 | Nuclear factor erythroid 2-related factor 2                                                          | NFE2L2   |
| 171 | Serine/threonine-protein kinase Chk2                                                                 | CHEK2    |
| 172 | Heat shock factor protein 1                                                                          | HSF1     |
| 173 | C-reactive protein                                                                                   | CRP      |
| 174 | C-X-C motif chemokine 10                                                                             | CXCL10   |
| 175 | Inhibitor of nuclear factor kappa-B kinase subunit alpha                                             | CHUK     |
| 176 | Osteopontin                                                                                          | SPP1     |
| 177 | Runt-related transcription factor 2                                                                  | RUNX2    |
| 178 | Ras association domain-containing protein 1                                                          | RASSF1   |
| 179 | Transcription factor E2F1                                                                            | E2F1     |

|     |                                                            |         |
|-----|------------------------------------------------------------|---------|
| 180 | Transcription factor E2F2                                  | E2F2    |
| 181 | Insulin-like growth factor-binding protein 3               | IGFBP3  |
| 182 | Insulin-like growth factor II                              | IGF2    |
| 183 | Interferon regulatory factor 1                             | IRF1    |
| 184 | Receptor tyrosine-protein kinase erbB-3                    | ERBB3   |
| 185 | Ras GTPase-activating protein 1                            | RASA1   |
| 186 | Serine/threonine-protein kinase Aurora-B                   | AURKB   |
| 187 | PI3-kinase p85-alpha subunit                               | PIK3R1  |
| 188 | Focal adhesion kinase 1                                    | PTK2    |
| 189 | Serine/threonine-protein kinase PLK1                       | PLK1    |
| 190 | Casein kinase II subunit alpha                             | CSNK2A1 |
| 191 | C-X-C chemokine receptor type 1                            | CXCR1   |
| 192 | ALK tyrosine kinase receptor                               | ALK     |
| 193 | Tyrosine-protein kinase receptor UFO                       | AXL     |
| 194 | Microtubule-associated protein tau                         | MAPT    |
| 195 | Myosin light chain kinase, smooth muscle                   | MYLK    |
| 196 | DNA-(apurinic or apyrimidinic site) lyase                  | APEX1   |
| 197 | Basic fibroblast growth factor receptor 1                  | FGFR1   |
| 198 | Bone morphogenetic protein 7                               | BMP7    |
| 199 | S-methyl-5-thioadenosine phosphorylase                     | MTAP    |
| 200 | Retinoic acid receptor RXR-beta                            | RXRB    |
| 201 | Retinoic acid receptor alpha                               | RARA    |
| 202 | Receptor tyrosine-protein kinase erbB-4                    | ERBB4   |
| 203 | Fatty acid-binding protein, adipocyte                      | FABP4   |
| 204 | Smoothed homolog                                           | SMO     |
| 205 | Neuronal acetylcholine receptor subunit alpha-4            | CHRNA4  |
| 206 | P-selectin                                                 | SELP    |
| 207 | SPARC                                                      | SPARC   |
| 208 | C-X-C chemokine receptor type 2                            | CXCR2   |
| 209 | Dual specificity mitogen-activated protein kinase kinase 1 | MAP2K1  |
| 210 | Thrombopoietin receptor                                    | MPL     |
| 211 | TGF-beta receptor type-2                                   | TGFBR2  |
| 212 | Heparin-binding growth factor 1                            | FGF1    |
| 213 | Thymidine phosphorylase                                    | TYMP    |
| 214 | Angiotensin-converting enzyme                              | ACE     |
| 215 | Caspase-1                                                  | CASP1   |
| 216 | Dual specificity mitogen-activated protein kinase kinase 4 | MAP2K4  |
| 217 | Proto-oncogene tyrosine-protein kinase receptor Ret        | RET     |
| 218 | Superoxide dismutase [Mn], mitochondrial                   | SOD2    |
| 219 | Fibroblast growth factor receptor 2                        | FGFR2   |
| 220 | Endothelin-1 receptor                                      | EDNRA   |
| 221 | Plasminogen                                                | PLG     |
| 222 | Fatty acid synthase                                        | FASN    |
| 223 | Catalase                                                   | CAT     |
| 224 | Cytosolic phospholipase A2                                 | PLA2G4A |
| 225 | Canalicular multispecific organic anion transporter 1      | ABCC2   |

|                                               |        |
|-----------------------------------------------|--------|
| 226 Serine/threonine-protein kinase mTOR      | MTOR   |
| 227 Catenin alpha-1                           | CTNNA1 |
| 228 Non-receptor tyrosine-protein kinase TYK2 | TYK2   |
| 229 Cytochrome c                              | CYCS   |

---
