# Supplementary material for: Integrating Network Pharmacology and Experimental Validation to Elucidate the Mechanism of Yiqi Yangyin Decoction in Suppressing Non‐Small‐Cell Lung Cancer
Source: Hindawi journal article supplement (doi:10.1155/2023/4967544), 2023-01-01
Supplement: f5 [file 4967544.f5.pdf]

**Supplementary Table 4 Parameters of the core genes in the PPI Network**

| <b>Number</b> | <b>Gene</b> | <b>DC</b> | <b>BC</b> | <b>CC</b>  |
|---------------|-------------|-----------|-----------|------------|
| 1             | AKT1        | 33        | 47.02234  | 0.88372093 |
| 2             | SRC         | 30        | 34.479958 | 0.82608694 |
| 3             | JUN         | 30        | 32.362465 | 0.82608694 |
| 4             | TP53        | 30        | 32.02045  | 0.82608694 |
| 5             | EGFR        | 29        | 27.65256  | 0.80851066 |
| 6             | MYC         | 28        | 28.91983  | 0.7916667  |
| 7             | STAT1       | 27        | 27.851223 | 0.7755102  |
| 8             | ESR1        | 26        | 24.202396 | 0.76       |
| 9             | HSP90AA1    | 26        | 26.196888 | 0.76       |
| 10            | CASP3       | 26        | 26.26666  | 0.76       |
| 11            | EGF         | 26        | 23.183254 | 0.76       |
| 12            | MAPK1       | 26        | 22.012373 | 0.76       |
| 13            | VEGFA       | 25        | 22.767511 | 0.74509805 |
| 14            | IL6         | 23        | 15.678348 | 0.7169811  |
| 15            | RELA        | 23        | 17.538237 | 0.7169811  |
| 16            | HIF1A       | 22        | 12.680949 | 0.7037037  |
| 17            | TNF         | 22        | 14.453227 | 0.7037037  |
| 18            | PTEN        | 22        | 12.434376 | 0.7037037  |
| 19            | MAPK14      | 22        | 11.511389 | 0.7037037  |
| 20            | ERBB2       | 21        | 15.617214 | 0.6909091  |
| 21            | PIK3R1      | 21        | 17.144556 | 0.6909091  |
| 22            | CCND1       | 21        | 9.324182  | 0.6909091  |
| 23            | MAPK8       | 20        | 12.671127 | 0.6785714  |
| 24            | FOS         | 20        | 9.305122  | 0.6785714  |
| 25            | PTK2        | 19        | 10.488007 | 0.6666667  |
| 26            | IL2         | 19        | 10.71837  | 0.6666667  |
| 27            | PTPN11      | 18        | 10.135038 | 0.6551724  |
| 28            | BCL2L1      | 18        | 10.404648 | 0.6551724  |
| 29            | MAP2K1      | 17        | 13.036323 | 0.6440678  |
| 30            | IL1B        | 17        | 6.963662  | 0.6440678  |
| 31            | NFKBIA      | 17        | 7.34223   | 0.6440678  |
| 32            | CAV1        | 16        | 9.695935  | 0.6333333  |
| 33            | LCK         | 16        | 5.6131086 | 0.6333333  |
| 34            | PPARG       | 16        | 7.70334   | 0.6333333  |
| 35            | MDM2        | 15        | 3.9239686 | 0.6229508  |
| 36            | PRKACA      | 14        | 8.503685  | 0.61290324 |
| 37            | CDKN1A      | 14        | 2.8582258 | 0.61290324 |
| 38            | ALB         | 14        | 4.2802677 | 0.61290324 |
| 39            | GSK3B       | 13        | 5.0365524 | 0.6031746  |
