# Supplementary material for: Integrating Network Pharmacology and Experimental Validation to Elucidate the Mechanism of Yiqi Yangyin Decoction in Suppressing Non‐Small‐Cell Lung Cancer
Source: Hindawi journal article supplement (doi:10.1155/2023/4967544), 2023-01-01
Supplement: f6 [file 4967544.f6.pdf]

**Supplementay Table 5 The detailed information for GO terms with  $P < 0.05$  and Count  $\geq 2$**

| Category         | ID         | Count | PValue   | %        |
|------------------|------------|-------|----------|----------|
| GOTERM_BP_DIRECT | GO:0010628 | 20    | 1.89E-20 | 51.28205 |
| GOTERM_BP_DIRECT | GO:0043066 | 19    | 1.06E-18 | 48.71795 |
| GOTERM_BP_DIRECT | GO:0045893 | 18    | 5.68E-15 | 46.15385 |
| GOTERM_BP_DIRECT | GO:0042493 | 14    | 6.96E-15 | 35.89744 |
| GOTERM_BP_DIRECT | GO:0045944 | 20    | 1.26E-13 | 51.28205 |
| GOTERM_BP_DIRECT | GO:1902895 | 8     | 4.51E-12 | 20.51282 |
| GOTERM_BP_DIRECT | GO:0071456 | 10    | 5.97E-12 | 25.64103 |
| GOTERM_BP_DIRECT | GO:0008284 | 14    | 2.01E-11 | 35.89744 |
| GOTERM_BP_DIRECT | GO:0009410 | 10    | 7.71E-10 | 25.64103 |
| GOTERM_BP_DIRECT | GO:0001934 | 9     | 6.23E-09 | 23.07692 |
| GOTERM_BP_DIRECT | GO:0034614 | 6     | 9.48E-09 | 15.38462 |
| GOTERM_BP_DIRECT | GO:0043406 | 7     | 1.06E-08 | 17.94872 |
| GOTERM_BP_DIRECT | GO:0031663 | 6     | 1.25E-08 | 15.38462 |
| GOTERM_BP_DIRECT | GO:0071276 | 6     | 1.62E-08 | 15.38462 |
| GOTERM_BP_DIRECT | GO:0019221 | 8     | 2.05E-08 | 20.51282 |
| GOTERM_BP_DIRECT | GO:0033138 | 7     | 2.30E-08 | 17.94872 |
| GOTERM_BP_DIRECT | GO:0006468 | 11    | 3.19E-08 | 28.20513 |
| GOTERM_BP_DIRECT | GO:0007173 | 6     | 4.08E-08 | 15.38462 |
| GOTERM_BP_DIRECT | GO:0035994 | 5     | 6.11E-08 | 12.82051 |
| GOTERM_BP_DIRECT | GO:0032869 | 7     | 6.82E-08 | 17.94872 |
| GOTERM_BP_DIRECT | GO:0060252 | 5     | 1.11E-07 | 12.82051 |
| GOTERM_BP_DIRECT | GO:0051091 | 7     | 1.15E-07 | 17.94872 |
| GOTERM_BP_DIRECT | GO:0010629 | 9     | 1.26E-07 | 23.07692 |
| GOTERM_BP_DIRECT | GO:0051726 | 9     | 1.53E-07 | 23.07692 |
| GOTERM_BP_DIRECT | GO:0051897 | 7     | 1.78E-07 | 17.94872 |
| GOTERM_BP_DIRECT | GO:0043065 | 9     | 2.04E-07 | 23.07692 |
| GOTERM_BP_DIRECT | GO:0010573 | 4     | 2.47E-07 | 10.25641 |
| GOTERM_BP_DIRECT | GO:0048661 | 6     | 2.51E-07 | 15.38462 |
| GOTERM_BP_DIRECT | GO:0018107 | 6     | 2.70E-07 | 15.38462 |
| GOTERM_BP_DIRECT | GO:0070374 | 8     | 2.75E-07 | 20.51282 |
| GOTERM_BP_DIRECT | GO:0043627 | 6     | 2.89E-07 | 15.38462 |
| GOTERM_BP_DIRECT | GO:0018108 | 7     | 2.90E-07 | 17.94872 |
| GOTERM_BP_DIRECT | GO:0007165 | 14    | 4.68E-07 | 35.89744 |
| GOTERM_BP_DIRECT | GO:0001525 | 8     | 5.40E-07 | 20.51282 |
| GOTERM_BP_DIRECT | GO:0030335 | 8     | 6.00E-07 | 20.51282 |
| GOTERM_BP_DIRECT | GO:0010888 | 4     | 8.43E-07 | 10.25641 |
| GOTERM_BP_DIRECT | GO:0031295 | 5     | 1.24E-06 | 12.82051 |
| GOTERM_BP_DIRECT | GO:0018105 | 7     | 1.37E-06 | 17.94872 |
| GOTERM_BP_DIRECT | GO:0046777 | 7     | 1.37E-06 | 17.94872 |
| GOTERM_BP_DIRECT | GO:0097421 | 5     | 1.37E-06 | 12.82051 |
| GOTERM_BP_DIRECT | GO:1903800 | 4     | 1.54E-06 | 10.25641 |
| GOTERM_BP_DIRECT | GO:0000122 | 12    | 1.67E-06 | 30.76923 |
| GOTERM_BP_DIRECT | GO:0071222 | 7     | 1.98E-06 | 17.94872 |

|                  |            |    |          |          |
|------------------|------------|----|----------|----------|
| GOTERM_BP_DIRECT | GO:0006915 | 10 | 2.08E-06 | 25.64103 |
| GOTERM_BP_DIRECT | GO:0071364 | 5  | 2.16E-06 | 12.82051 |
| GOTERM_BP_DIRECT | GO:0045429 | 5  | 2.56E-06 | 12.82051 |
| GOTERM_BP_DIRECT | GO:0034097 | 5  | 3.01E-06 | 12.82051 |
| GOTERM_BP_DIRECT | GO:0090398 | 5  | 3.80E-06 | 12.82051 |
| GOTERM_BP_DIRECT | GO:0007507 | 7  | 4.01E-06 | 17.94872 |
| GOTERM_BP_DIRECT | GO:0033209 | 5  | 4.09E-06 | 12.82051 |
| GOTERM_BP_DIRECT | GO:0048146 | 5  | 4.72E-06 | 12.82051 |
| GOTERM_BP_DIRECT | GO:0000165 | 6  | 5.05E-06 | 15.38462 |
| GOTERM_BP_DIRECT | GO:0060749 | 4  | 5.67E-06 | 10.25641 |
| GOTERM_BP_DIRECT | GO:0007249 | 5  | 6.21E-06 | 12.82051 |
| GOTERM_BP_DIRECT | GO:2000811 | 4  | 6.72E-06 | 10.25641 |
| GOTERM_BP_DIRECT | GO:2000573 | 4  | 6.72E-06 | 10.25641 |
| GOTERM_BP_DIRECT | GO:0046827 | 4  | 6.72E-06 | 10.25641 |
| GOTERM_BP_DIRECT | GO:0006366 | 7  | 6.96E-06 | 17.94872 |
| GOTERM_BP_DIRECT | GO:0009612 | 5  | 7.06E-06 | 12.82051 |
| GOTERM_BP_DIRECT | GO:0010165 | 4  | 7.90E-06 | 10.25641 |
| GOTERM_BP_DIRECT | GO:0007611 | 5  | 8.51E-06 | 12.82051 |
| GOTERM_BP_DIRECT | GO:0043154 | 5  | 1.02E-05 | 12.82051 |
| GOTERM_BP_DIRECT | GO:0070141 | 3  | 1.14E-05 | 7.692308 |
| GOTERM_BP_DIRECT | GO:0070301 | 5  | 1.34E-05 | 12.82051 |
| GOTERM_BP_DIRECT | GO:0032091 | 5  | 1.42E-05 | 12.82051 |
| GOTERM_BP_DIRECT | GO:0006974 | 7  | 1.54E-05 | 17.94872 |
| GOTERM_BP_DIRECT | GO:0001938 | 5  | 1.57E-05 | 12.82051 |
| GOTERM_BP_DIRECT | GO:0051000 | 4  | 1.79E-05 | 10.25641 |
| GOTERM_BP_DIRECT | GO:0014068 | 5  | 2.12E-05 | 12.82051 |
| GOTERM_BP_DIRECT | GO:1990646 | 3  | 2.27E-05 | 7.692308 |
| GOTERM_BP_DIRECT | GO:0035556 | 8  | 2.45E-05 | 20.51282 |
| GOTERM_BP_DIRECT | GO:0071260 | 5  | 2.55E-05 | 12.82051 |
| GOTERM_BP_DIRECT | GO:0048010 | 4  | 2.77E-05 | 10.25641 |
| GOTERM_BP_DIRECT | GO:0071480 | 4  | 3.07E-05 | 10.25641 |
| GOTERM_BP_DIRECT | GO:0046677 | 4  | 3.38E-05 | 10.25641 |
| GOTERM_BP_DIRECT | GO:0050731 | 5  | 3.61E-05 | 12.82051 |
| GOTERM_BP_DIRECT | GO:0007568 | 6  | 3.78E-05 | 15.38462 |
| GOTERM_BP_DIRECT | GO:0035924 | 4  | 4.07E-05 | 10.25641 |
| GOTERM_BP_DIRECT | GO:0097192 | 4  | 4.44E-05 | 10.25641 |
| GOTERM_BP_DIRECT | GO:0007179 | 5  | 4.59E-05 | 12.82051 |
| GOTERM_BP_DIRECT | GO:0006606 | 5  | 4.95E-05 | 12.82051 |
| GOTERM_BP_DIRECT | GO:0061419 | 3  | 5.66E-05 | 7.692308 |
| GOTERM_BP_DIRECT | GO:2001240 | 4  | 5.70E-05 | 10.25641 |
| GOTERM_BP_DIRECT | GO:0046326 | 4  | 6.17E-05 | 10.25641 |
| GOTERM_BP_DIRECT | GO:0050729 | 5  | 6.41E-05 | 12.82051 |
| GOTERM_BP_DIRECT | GO:0032355 | 5  | 6.87E-05 | 12.82051 |
| GOTERM_BP_DIRECT | GO:0030316 | 4  | 7.18E-05 | 10.25641 |
| GOTERM_BP_DIRECT | GO:0042593 | 5  | 7.36E-05 | 12.82051 |
| GOTERM_BP_DIRECT | GO:0042307 | 4  | 8.88E-05 | 10.25641 |

|                  |            |    |          |          |
|------------------|------------|----|----------|----------|
| GOTERM_BP_DIRECT | GO:0014065 | 4  | 9.50E-05 | 10.25641 |
| GOTERM_BP_DIRECT | GO:0042981 | 6  | 1.04E-04 | 15.38462 |
| GOTERM_BP_DIRECT | GO:0038134 | 3  | 1.05E-04 | 7.692308 |
| GOTERM_BP_DIRECT | GO:0007595 | 4  | 1.08E-04 | 10.25641 |
| GOTERM_BP_DIRECT | GO:0051591 | 4  | 1.15E-04 | 10.25641 |
| GOTERM_BP_DIRECT | GO:0045737 | 4  | 1.23E-04 | 10.25641 |
| GOTERM_BP_DIRECT | GO:0007169 | 5  | 1.30E-04 | 12.82051 |
| GOTERM_BP_DIRECT | GO:2000641 | 3  | 1.35E-04 | 7.692308 |
| GOTERM_BP_DIRECT | GO:0043491 | 4  | 1.55E-04 | 10.25641 |
| GOTERM_BP_DIRECT | GO:0070371 | 4  | 1.73E-04 | 10.25641 |
| GOTERM_BP_DIRECT | GO:1904707 | 4  | 1.73E-04 | 10.25641 |
| GOTERM_BP_DIRECT | GO:0071407 | 4  | 1.73E-04 | 10.25641 |
| GOTERM_BP_DIRECT | GO:0071356 | 5  | 1.77E-04 | 12.82051 |
| GOTERM_BP_DIRECT | GO:1903078 | 4  | 1.93E-04 | 10.25641 |
| GOTERM_BP_DIRECT | GO:0060020 | 3  | 2.06E-04 | 7.692308 |
| GOTERM_BP_DIRECT | GO:0009651 | 3  | 2.06E-04 | 7.692308 |
| GOTERM_BP_DIRECT | GO:1903799 | 3  | 2.06E-04 | 7.692308 |
| GOTERM_BP_DIRECT | GO:0032495 | 3  | 2.47E-04 | 7.692308 |
| GOTERM_BP_DIRECT | GO:0008285 | 7  | 2.57E-04 | 17.94872 |
| GOTERM_BP_DIRECT | GO:0043525 | 4  | 2.59E-04 | 10.25641 |
| GOTERM_BP_DIRECT | GO:0030168 | 4  | 2.72E-04 | 10.25641 |
| GOTERM_BP_DIRECT | GO:0043410 | 5  | 2.72E-04 | 12.82051 |
| GOTERM_BP_DIRECT | GO:0032757 | 4  | 2.85E-04 | 10.25641 |
| GOTERM_BP_DIRECT | GO:0051974 | 3  | 2.92E-04 | 7.692308 |
| GOTERM_BP_DIRECT | GO:0048011 | 3  | 2.92E-04 | 7.692308 |
| GOTERM_BP_DIRECT | GO:0035690 | 4  | 3.11E-04 | 10.25641 |
| GOTERM_BP_DIRECT | GO:0006006 | 4  | 3.11E-04 | 10.25641 |
| GOTERM_BP_DIRECT | GO:0030154 | 8  | 3.22E-04 | 20.51282 |
| GOTERM_BP_DIRECT | GO:1904996 | 3  | 3.40E-04 | 7.692308 |
| GOTERM_BP_DIRECT | GO:0006357 | 12 | 3.50E-04 | 30.76923 |
| GOTERM_BP_DIRECT | GO:1901224 | 4  | 3.54E-04 | 10.25641 |
| GOTERM_BP_DIRECT | GO:0007623 | 4  | 3.54E-04 | 10.25641 |
| GOTERM_BP_DIRECT | GO:0050679 | 4  | 3.85E-04 | 10.25641 |
| GOTERM_BP_DIRECT | GO:1904385 | 3  | 3.92E-04 | 7.692308 |
| GOTERM_BP_DIRECT | GO:0051402 | 4  | 4.17E-04 | 10.25641 |
| GOTERM_BP_DIRECT | GO:0071300 | 4  | 4.17E-04 | 10.25641 |
| GOTERM_BP_DIRECT | GO:0001666 | 5  | 4.43E-04 | 12.82051 |
| GOTERM_BP_DIRECT | GO:0034116 | 3  | 4.47E-04 | 7.692308 |
| GOTERM_BP_DIRECT | GO:0051146 | 3  | 4.47E-04 | 7.692308 |
| GOTERM_BP_DIRECT | GO:0048511 | 4  | 4.69E-04 | 10.25641 |
| GOTERM_BP_DIRECT | GO:0008283 | 5  | 4.81E-04 | 12.82051 |
| GOTERM_BP_DIRECT | GO:0048143 | 3  | 5.06E-04 | 7.692308 |
| GOTERM_BP_DIRECT | GO:0045727 | 4  | 5.84E-04 | 10.25641 |
| GOTERM_BP_DIRECT | GO:0030224 | 3  | 6.35E-04 | 7.692308 |
| GOTERM_BP_DIRECT | GO:0071391 | 3  | 6.35E-04 | 7.692308 |
| GOTERM_BP_DIRECT | GO:2000060 | 3  | 6.35E-04 | 7.692308 |

|                  |            |   |          |          |
|------------------|------------|---|----------|----------|
| GOTERM_BP_DIRECT | GO:0010039 | 3 | 6.35E-04 | 7.692308 |
| GOTERM_BP_DIRECT | GO:0098586 | 4 | 6.48E-04 | 10.25641 |
| GOTERM_BP_DIRECT | GO:0009636 | 4 | 6.70E-04 | 10.25641 |
| GOTERM_BP_DIRECT | GO:0051412 | 3 | 7.05E-04 | 7.692308 |
| GOTERM_BP_DIRECT | GO:0071375 | 3 | 7.05E-04 | 7.692308 |
| GOTERM_BP_DIRECT | GO:1902004 | 3 | 7.78E-04 | 7.692308 |
| GOTERM_BP_DIRECT | GO:0030307 | 4 | 7.89E-04 | 10.25641 |
| GOTERM_BP_DIRECT | GO:0038083 | 3 | 8.54E-04 | 7.692308 |
| GOTERM_BP_DIRECT | GO:0001836 | 3 | 8.54E-04 | 7.692308 |
| GOTERM_BP_DIRECT | GO:0006977 | 3 | 8.54E-04 | 7.692308 |
| GOTERM_BP_DIRECT | GO:0045892 | 7 | 9.66E-04 | 17.94872 |
| GOTERM_BP_DIRECT | GO:0050768 | 3 | 0.001018 | 7.692308 |
| GOTERM_BP_DIRECT | GO:0051247 | 3 | 0.001018 | 7.692308 |
| GOTERM_BP_DIRECT | GO:0042060 | 4 | 0.001094 | 10.25641 |
| GOTERM_BP_DIRECT | GO:0032755 | 4 | 0.001094 | 10.25641 |
| GOTERM_BP_DIRECT | GO:0006954 | 6 | 0.001215 | 15.38462 |
| GOTERM_BP_DIRECT | GO:0090263 | 4 | 0.001289 | 10.25641 |
| GOTERM_BP_DIRECT | GO:0010875 | 3 | 0.00129  | 7.692308 |
| GOTERM_BP_DIRECT | GO:2001243 | 3 | 0.001388 | 7.692308 |
| GOTERM_BP_DIRECT | GO:0070372 | 3 | 0.001489 | 7.692308 |
| GOTERM_BP_DIRECT | GO:1900017 | 3 | 0.001489 | 7.692308 |
| GOTERM_BP_DIRECT | GO:0045840 | 3 | 0.001593 | 7.692308 |
| GOTERM_BP_DIRECT | GO:0010575 | 3 | 0.001593 | 7.692308 |
| GOTERM_BP_DIRECT | GO:0042327 | 3 | 0.001701 | 7.692308 |
| GOTERM_BP_DIRECT | GO:0045740 | 3 | 0.001812 | 7.692308 |
| GOTERM_BP_DIRECT | GO:0045736 | 3 | 0.001926 | 7.692308 |
| GOTERM_BP_DIRECT | GO:0043388 | 3 | 0.001926 | 7.692308 |
| GOTERM_BP_DIRECT | GO:0045648 | 3 | 0.002044 | 7.692308 |
| GOTERM_BP_DIRECT | GO:0048144 | 3 | 0.002044 | 7.692308 |
| GOTERM_BP_DIRECT | GO:0051973 | 3 | 0.002044 | 7.692308 |
| GOTERM_BP_DIRECT | GO:0048147 | 3 | 0.002044 | 7.692308 |
| GOTERM_BP_DIRECT | GO:2000379 | 3 | 0.002165 | 7.692308 |
| GOTERM_BP_DIRECT | GO:0030010 | 3 | 0.002165 | 7.692308 |
| GOTERM_BP_DIRECT | GO:0045471 | 4 | 0.002277 | 10.25641 |
| GOTERM_BP_DIRECT | GO:0010975 | 3 | 0.002418 | 7.692308 |
| GOTERM_BP_DIRECT | GO:0032570 | 3 | 0.002418 | 7.692308 |
| GOTERM_BP_DIRECT | GO:2001244 | 3 | 0.002418 | 7.692308 |
| GOTERM_BP_DIRECT | GO:0045907 | 3 | 0.002549 | 7.692308 |
| GOTERM_BP_DIRECT | GO:0048870 | 3 | 0.002549 | 7.692308 |
| GOTERM_BP_DIRECT | GO:0001890 | 3 | 0.002683 | 7.692308 |
| GOTERM_BP_DIRECT | GO:0010634 | 3 | 0.002683 | 7.692308 |
| GOTERM_BP_DIRECT | GO:0001937 | 3 | 0.002683 | 7.692308 |
| GOTERM_BP_DIRECT | GO:0070555 | 3 | 0.002821 | 7.692308 |
| GOTERM_BP_DIRECT | GO:0071479 | 3 | 0.002962 | 7.692308 |
| GOTERM_BP_DIRECT | GO:0009409 | 3 | 0.003106 | 7.692308 |
| GOTERM_BP_DIRECT | GO:0030217 | 3 | 0.003106 | 7.692308 |

|                  |            |   |          |          |
|------------------|------------|---|----------|----------|
| GOTERM_BP_DIRECT | GO:0001541 | 3 | 0.003405 | 7.692308 |
| GOTERM_BP_DIRECT | GO:0032722 | 3 | 0.003559 | 7.692308 |
| GOTERM_BP_DIRECT | GO:1904706 | 3 | 0.003559 | 7.692308 |
| GOTERM_BP_DIRECT | GO:0043407 | 3 | 0.003559 | 7.692308 |
| GOTERM_BP_DIRECT | GO:0032496 | 4 | 0.003574 | 10.25641 |
| GOTERM_BP_DIRECT | GO:0043524 | 4 | 0.003704 | 10.25641 |
| GOTERM_BP_DIRECT | GO:0034198 | 3 | 0.003716 | 7.692308 |
| GOTERM_BP_DIRECT | GO:0051092 | 4 | 0.003837 | 10.25641 |
| GOTERM_BP_DIRECT | GO:2000272 | 3 | 0.003876 | 7.692308 |
| GOTERM_BP_DIRECT | GO:0050796 | 3 | 0.003876 | 7.692308 |
| GOTERM_BP_DIRECT | GO:0003151 | 3 | 0.00404  | 7.692308 |
| GOTERM_BP_DIRECT | GO:0042127 | 4 | 0.004112 | 10.25641 |
| GOTERM_BP_DIRECT | GO:0050673 | 3 | 0.004206 | 7.692308 |
| GOTERM_BP_DIRECT | GO:0043536 | 3 | 0.004376 | 7.692308 |
| GOTERM_BP_DIRECT | GO:0008630 | 3 | 0.004376 | 7.692308 |
| GOTERM_BP_DIRECT | GO:0048013 | 3 | 0.004549 | 7.692308 |
| GOTERM_BP_DIRECT | GO:1900087 | 3 | 0.004549 | 7.692308 |
| GOTERM_BP_DIRECT | GO:0030182 | 4 | 0.00485  | 10.25641 |
| GOTERM_BP_DIRECT | GO:0034605 | 3 | 0.004904 | 7.692308 |
| GOTERM_BP_DIRECT | GO:0042542 | 3 | 0.004904 | 7.692308 |
| GOTERM_BP_DIRECT | GO:0031334 | 3 | 0.005272 | 7.692308 |
| GOTERM_BP_DIRECT | GO:0016241 | 3 | 0.005272 | 7.692308 |
| GOTERM_BP_DIRECT | GO:0014823 | 3 | 0.005461 | 7.692308 |
| GOTERM_BP_DIRECT | GO:0031281 | 2 | 0.005909 | 5.128205 |
| GOTERM_BP_DIRECT | GO:0060559 | 2 | 0.005909 | 5.128205 |
| GOTERM_BP_DIRECT | GO:0086098 | 2 | 0.005909 | 5.128205 |
| GOTERM_BP_DIRECT | GO:0021697 | 2 | 0.005909 | 5.128205 |
| GOTERM_BP_DIRECT | GO:0071230 | 3 | 0.006044 | 7.692308 |
| GOTERM_BP_DIRECT | GO:0034644 | 3 | 0.006044 | 7.692308 |
| GOTERM_BP_DIRECT | GO:0045785 | 3 | 0.006044 | 7.692308 |
| GOTERM_BP_DIRECT | GO:0007254 | 3 | 0.006245 | 7.692308 |
| GOTERM_BP_DIRECT | GO:0008286 | 3 | 0.006245 | 7.692308 |
| GOTERM_BP_DIRECT | GO:0051592 | 3 | 0.006655 | 7.692308 |
| GOTERM_BP_DIRECT | GO:0045860 | 3 | 0.006865 | 7.692308 |
| GOTERM_BP_DIRECT | GO:0002931 | 3 | 0.007078 | 7.692308 |
| GOTERM_BP_DIRECT | GO:0071466 | 3 | 0.007294 | 7.692308 |
| GOTERM_BP_DIRECT | GO:0042752 | 3 | 0.007512 | 7.692308 |
| GOTERM_BP_DIRECT | GO:0000320 | 2 | 0.007871 | 5.128205 |
| GOTERM_BP_DIRECT | GO:0033590 | 2 | 0.007871 | 5.128205 |
| GOTERM_BP_DIRECT | GO:0090400 | 2 | 0.007871 | 5.128205 |
| GOTERM_BP_DIRECT | GO:0038127 | 2 | 0.007871 | 5.128205 |
| GOTERM_BP_DIRECT | GO:0090170 | 2 | 0.007871 | 5.128205 |
| GOTERM_BP_DIRECT | GO:0072717 | 2 | 0.007871 | 5.128205 |
| GOTERM_BP_DIRECT | GO:0030730 | 2 | 0.007871 | 5.128205 |
| GOTERM_BP_DIRECT | GO:0051384 | 3 | 0.007958 | 7.692308 |
| GOTERM_BP_DIRECT | GO:0010595 | 3 | 0.007958 | 7.692308 |

|                  |            |   |          |          |
|------------------|------------|---|----------|----------|
| GOTERM_BP_DIRECT | GO:0030163 | 3 | 0.007958 | 7.692308 |
| GOTERM_BP_DIRECT | GO:0042531 | 3 | 0.008186 | 7.692308 |
| GOTERM_BP_DIRECT | GO:0001701 | 4 | 0.008468 | 10.25641 |
| GOTERM_BP_DIRECT | GO:0033674 | 3 | 0.009124 | 7.692308 |
| GOTERM_BP_DIRECT | GO:0050821 | 4 | 0.009247 | 10.25641 |
| GOTERM_BP_DIRECT | GO:0000082 | 3 | 0.009366 | 7.692308 |
| GOTERM_BP_DIRECT | GO:0051222 | 2 | 0.009829 | 5.128205 |
| GOTERM_BP_DIRECT | GO:0060574 | 2 | 0.009829 | 5.128205 |
| GOTERM_BP_DIRECT | GO:0031622 | 2 | 0.009829 | 5.128205 |
| GOTERM_BP_DIRECT | GO:0072584 | 2 | 0.009829 | 5.128205 |
| GOTERM_BP_DIRECT | GO:1905278 | 2 | 0.009829 | 5.128205 |
| GOTERM_BP_DIRECT | GO:0007584 | 3 | 0.009858 | 7.692308 |
| GOTERM_BP_DIRECT | GO:0051607 | 4 | 0.010553 | 10.25641 |
| GOTERM_BP_DIRECT | GO:0032729 | 3 | 0.010618 | 7.692308 |
| GOTERM_BP_DIRECT | GO:0032436 | 3 | 0.011138 | 7.692308 |
| GOTERM_BP_DIRECT | GO:0006919 | 3 | 0.011403 | 7.692308 |
| GOTERM_BP_DIRECT | GO:0010632 | 2 | 0.011784 | 5.128205 |
| GOTERM_BP_DIRECT | GO:0071347 | 3 | 0.013616 | 7.692308 |
| GOTERM_BP_DIRECT | GO:0007265 | 3 | 0.013616 | 7.692308 |
| GOTERM_BP_DIRECT | GO:0045732 | 3 | 0.013616 | 7.692308 |
| GOTERM_BP_DIRECT | GO:1903721 | 2 | 0.013734 | 5.128205 |
| GOTERM_BP_DIRECT | GO:0071494 | 2 | 0.013734 | 5.128205 |
| GOTERM_BP_DIRECT | GO:0021955 | 2 | 0.013734 | 5.128205 |
| GOTERM_BP_DIRECT | GO:0060440 | 2 | 0.013734 | 5.128205 |
| GOTERM_BP_DIRECT | GO:0060355 | 2 | 0.013734 | 5.128205 |
| GOTERM_BP_DIRECT | GO:0071455 | 2 | 0.013734 | 5.128205 |
| GOTERM_BP_DIRECT | GO:0010742 | 2 | 0.013734 | 5.128205 |
| GOTERM_BP_DIRECT | GO:0031647 | 3 | 0.014491 | 7.692308 |
| GOTERM_BP_DIRECT | GO:0007172 | 2 | 0.015682 | 5.128205 |
| GOTERM_BP_DIRECT | GO:0071312 | 2 | 0.015682 | 5.128205 |
| GOTERM_BP_DIRECT | GO:0030512 | 3 | 0.015693 | 7.692308 |
| GOTERM_BP_DIRECT | GO:0071346 | 3 | 0.01631  | 7.692308 |
| GOTERM_BP_DIRECT | GO:0046825 | 2 | 0.017625 | 5.128205 |
| GOTERM_BP_DIRECT | GO:0071316 | 2 | 0.017625 | 5.128205 |
| GOTERM_BP_DIRECT | GO:0050999 | 2 | 0.017625 | 5.128205 |
| GOTERM_BP_DIRECT | GO:0032886 | 2 | 0.017625 | 5.128205 |
| GOTERM_BP_DIRECT | GO:0070431 | 2 | 0.017625 | 5.128205 |
| GOTERM_BP_DIRECT | GO:1902966 | 2 | 0.017625 | 5.128205 |
| GOTERM_BP_DIRECT | GO:1903140 | 2 | 0.017625 | 5.128205 |
| GOTERM_BP_DIRECT | GO:0032760 | 3 | 0.019213 | 7.692308 |
| GOTERM_BP_DIRECT | GO:0045899 | 2 | 0.019564 | 5.128205 |
| GOTERM_BP_DIRECT | GO:0043068 | 2 | 0.019564 | 5.128205 |
| GOTERM_BP_DIRECT | GO:0033598 | 2 | 0.019564 | 5.128205 |
| GOTERM_BP_DIRECT | GO:0044346 | 2 | 0.019564 | 5.128205 |
| GOTERM_BP_DIRECT | GO:1901522 | 2 | 0.019564 | 5.128205 |
| GOTERM_BP_DIRECT | GO:0045792 | 2 | 0.019564 | 5.128205 |

|                  |            |   |          |          |
|------------------|------------|---|----------|----------|
| GOTERM_BP_DIRECT | GO:0032872 | 2 | 0.019564 | 5.128205 |
| GOTERM_BP_DIRECT | GO:0010907 | 2 | 0.019564 | 5.128205 |
| GOTERM_BP_DIRECT | GO:0007229 | 3 | 0.019886 | 7.692308 |
| GOTERM_BP_DIRECT | GO:0009615 | 3 | 0.020225 | 7.692308 |
| GOTERM_BP_DIRECT | GO:0071803 | 2 | 0.0215   | 5.128205 |
| GOTERM_BP_DIRECT | GO:0006983 | 2 | 0.0215   | 5.128205 |
| GOTERM_BP_DIRECT | GO:1903715 | 2 | 0.0215   | 5.128205 |
| GOTERM_BP_DIRECT | GO:0097011 | 2 | 0.0215   | 5.128205 |
| GOTERM_BP_DIRECT | GO:0071223 | 2 | 0.0215   | 5.128205 |
| GOTERM_BP_DIRECT | GO:0031642 | 2 | 0.0215   | 5.128205 |
| GOTERM_BP_DIRECT | GO:0007166 | 4 | 0.022061 | 10.25641 |
| GOTERM_BP_DIRECT | GO:0006979 | 3 | 0.023394 | 7.692308 |
| GOTERM_BP_DIRECT | GO:1990314 | 2 | 0.023432 | 5.128205 |
| GOTERM_BP_DIRECT | GO:0070417 | 2 | 0.023432 | 5.128205 |
| GOTERM_BP_DIRECT | GO:0060333 | 2 | 0.023432 | 5.128205 |
| GOTERM_BP_DIRECT | GO:0006935 | 3 | 0.024493 | 7.692308 |
| GOTERM_BP_DIRECT | GO:0048546 | 2 | 0.025361 | 5.128205 |
| GOTERM_BP_DIRECT | GO:0033628 | 2 | 0.025361 | 5.128205 |
| GOTERM_BP_DIRECT | GO:0060411 | 2 | 0.025361 | 5.128205 |
| GOTERM_BP_DIRECT | GO:0060396 | 2 | 0.025361 | 5.128205 |
| GOTERM_BP_DIRECT | GO:0032026 | 2 | 0.025361 | 5.128205 |
| GOTERM_BP_DIRECT | GO:0010918 | 2 | 0.025361 | 5.128205 |
| GOTERM_BP_DIRECT | GO:0061029 | 2 | 0.025361 | 5.128205 |
| GOTERM_BP_DIRECT | GO:0031571 | 2 | 0.025361 | 5.128205 |
| GOTERM_BP_DIRECT | GO:0010745 | 2 | 0.025361 | 5.128205 |
| GOTERM_BP_DIRECT | GO:0030308 | 3 | 0.02599  | 7.692308 |
| GOTERM_BP_DIRECT | GO:0050830 | 3 | 0.026753 | 7.692308 |
| GOTERM_BP_DIRECT | GO:0006978 | 2 | 0.027285 | 5.128205 |
| GOTERM_BP_DIRECT | GO:0010659 | 2 | 0.027285 | 5.128205 |
| GOTERM_BP_DIRECT | GO:0070102 | 2 | 0.027285 | 5.128205 |
| GOTERM_BP_DIRECT | GO:0045667 | 2 | 0.027285 | 5.128205 |
| GOTERM_BP_DIRECT | GO:0007260 | 2 | 0.027285 | 5.128205 |
| GOTERM_BP_DIRECT | GO:0051149 | 2 | 0.029206 | 5.128205 |
| GOTERM_BP_DIRECT | GO:0002687 | 2 | 0.029206 | 5.128205 |
| GOTERM_BP_DIRECT | GO:0032270 | 2 | 0.029206 | 5.128205 |
| GOTERM_BP_DIRECT | GO:0046685 | 2 | 0.029206 | 5.128205 |
| GOTERM_BP_DIRECT | GO:0045087 | 5 | 0.029358 | 12.82051 |
| GOTERM_BP_DIRECT | GO:0090399 | 2 | 0.031123 | 5.128205 |
| GOTERM_BP_DIRECT | GO:0019395 | 2 | 0.031123 | 5.128205 |
| GOTERM_BP_DIRECT | GO:0030278 | 2 | 0.031123 | 5.128205 |
| GOTERM_BP_DIRECT | GO:0032966 | 2 | 0.031123 | 5.128205 |
| GOTERM_BP_DIRECT | GO:0010763 | 2 | 0.031123 | 5.128205 |
| GOTERM_BP_DIRECT | GO:0050862 | 2 | 0.031123 | 5.128205 |
| GOTERM_BP_DIRECT | GO:0008637 | 2 | 0.033037 | 5.128205 |
| GOTERM_BP_DIRECT | GO:0050995 | 2 | 0.033037 | 5.128205 |
| GOTERM_BP_DIRECT | GO:0030857 | 2 | 0.033037 | 5.128205 |

|                  |            |   |          |          |
|------------------|------------|---|----------|----------|
| GOTERM_BP_DIRECT | GO:0051403 | 2 | 0.033037 | 5.128205 |
| GOTERM_BP_DIRECT | GO:0070848 | 2 | 0.033037 | 5.128205 |
| GOTERM_BP_DIRECT | GO:0060065 | 2 | 0.033037 | 5.128205 |
| GOTERM_BP_DIRECT | GO:0046325 | 2 | 0.033037 | 5.128205 |
| GOTERM_BP_DIRECT | GO:0048009 | 2 | 0.033037 | 5.128205 |
| GOTERM_BP_DIRECT | GO:0071380 | 2 | 0.033037 | 5.128205 |
| GOTERM_BP_DIRECT | GO:0090090 | 3 | 0.033172 | 7.692308 |
| GOTERM_BP_DIRECT | GO:0030949 | 2 | 0.034947 | 5.128205 |
| GOTERM_BP_DIRECT | GO:0035234 | 2 | 0.034947 | 5.128205 |
| GOTERM_BP_DIRECT | GO:0051044 | 2 | 0.034947 | 5.128205 |
| GOTERM_BP_DIRECT | GO:0051895 | 2 | 0.034947 | 5.128205 |
| GOTERM_BP_DIRECT | GO:1901222 | 2 | 0.034947 | 5.128205 |
| GOTERM_BP_DIRECT | GO:0010759 | 2 | 0.036853 | 5.128205 |
| GOTERM_BP_DIRECT | GO:0031668 | 2 | 0.036853 | 5.128205 |
| GOTERM_BP_DIRECT | GO:0010243 | 2 | 0.036853 | 5.128205 |
| GOTERM_BP_DIRECT | GO:0030220 | 2 | 0.036853 | 5.128205 |
| GOTERM_BP_DIRECT | GO:0001892 | 2 | 0.038756 | 5.128205 |
| GOTERM_BP_DIRECT | GO:0007171 | 2 | 0.038756 | 5.128205 |
| GOTERM_BP_DIRECT | GO:0051899 | 2 | 0.038756 | 5.128205 |
| GOTERM_BP_DIRECT | GO:0030889 | 2 | 0.038756 | 5.128205 |
| GOTERM_BP_DIRECT | GO:0060716 | 2 | 0.038756 | 5.128205 |
| GOTERM_BP_DIRECT | GO:2000010 | 2 | 0.038756 | 5.128205 |
| GOTERM_BP_DIRECT | GO:0010666 | 2 | 0.038756 | 5.128205 |
| GOTERM_BP_DIRECT | GO:0002042 | 2 | 0.040655 | 5.128205 |
| GOTERM_BP_DIRECT | GO:0038096 | 2 | 0.040655 | 5.128205 |
| GOTERM_BP_DIRECT | GO:0033198 | 2 | 0.040655 | 5.128205 |
| GOTERM_BP_DIRECT | GO:1902894 | 2 | 0.040655 | 5.128205 |
| GOTERM_BP_DIRECT | GO:0060324 | 2 | 0.040655 | 5.128205 |
| GOTERM_BP_DIRECT | GO:0070498 | 2 | 0.040655 | 5.128205 |
| GOTERM_BP_DIRECT | GO:0045766 | 3 | 0.041493 | 7.692308 |
| GOTERM_BP_DIRECT | GO:0006809 | 2 | 0.04255  | 5.128205 |
| GOTERM_BP_DIRECT | GO:0090201 | 2 | 0.04255  | 5.128205 |
| GOTERM_BP_DIRECT | GO:0043254 | 2 | 0.04255  | 5.128205 |
| GOTERM_BP_DIRECT | GO:0031929 | 2 | 0.04255  | 5.128205 |
| GOTERM_BP_DIRECT | GO:0045780 | 2 | 0.04255  | 5.128205 |
| GOTERM_BP_DIRECT | GO:0006355 | 6 | 0.042975 | 15.38462 |
| GOTERM_BP_DIRECT | GO:0002053 | 2 | 0.044442 | 5.128205 |
| GOTERM_BP_DIRECT | GO:2000378 | 2 | 0.046329 | 5.128205 |
| GOTERM_BP_DIRECT | GO:0046628 | 2 | 0.046329 | 5.128205 |
| GOTERM_BP_DIRECT | GO:0038061 | 2 | 0.046329 | 5.128205 |
| GOTERM_BP_DIRECT | GO:0014911 | 2 | 0.046329 | 5.128205 |
| GOTERM_BP_DIRECT | GO:0045672 | 2 | 0.046329 | 5.128205 |
| GOTERM_BP_DIRECT | GO:0045821 | 2 | 0.046329 | 5.128205 |
| GOTERM_BP_DIRECT | GO:0045861 | 2 | 0.046329 | 5.128205 |
| GOTERM_BP_DIRECT | GO:0051276 | 2 | 0.046329 | 5.128205 |
| GOTERM_BP_DIRECT | GO:0031954 | 2 | 0.046329 | 5.128205 |



|                  |            |    |          |          |
|------------------|------------|----|----------|----------|
| GOTERM_BP_DIRECT | GO:0097194 | 2  | 0.048214 | 5.128205 |
| GOTERM_BP_DIRECT | GO:0035902 | 2  | 0.048214 | 5.128205 |
| GOTERM_CC_DIRECT | GO:0032991 | 16 | 6.98E-13 | 41.02564 |
| GOTERM_CC_DIRECT | GO:0005829 | 30 | 2.63E-10 | 76.92308 |
| GOTERM_CC_DIRECT | GO:0005634 | 29 | 1.49E-08 | 74.35897 |
| GOTERM_CC_DIRECT | GO:0005654 | 24 | 2.44E-08 | 61.53846 |
| GOTERM_CC_DIRECT | GO:0005737 | 26 | 7.66E-07 | 66.66667 |
| GOTERM_CC_DIRECT | GO:0005739 | 14 | 9.80E-07 | 35.89744 |
| GOTERM_CC_DIRECT | GO:0048471 | 10 | 8.16E-06 | 25.64103 |
| GOTERM_CC_DIRECT | GO:0005667 | 6  | 6.49E-05 | 15.38462 |
| GOTERM_CC_DIRECT | GO:0090575 | 5  | 7.34E-05 | 12.82051 |
| GOTERM_CC_DIRECT | GO:0045121 | 6  | 9.60E-05 | 15.38462 |
| GOTERM_CC_DIRECT | GO:0017053 | 4  | 2.17E-04 | 10.25641 |
| GOTERM_CC_DIRECT | GO:0031234 | 4  | 2.72E-04 | 10.25641 |
| GOTERM_CC_DIRECT | GO:0000785 | 9  | 6.02E-04 | 23.07692 |
| GOTERM_CC_DIRECT | GO:0005886 | 20 | 6.75E-04 | 51.28205 |
| GOTERM_CC_DIRECT | GO:0005925 | 6  | 0.001064 | 15.38462 |
| GOTERM_CC_DIRECT | GO:0005815 | 4  | 0.003234 | 10.25641 |
| GOTERM_CC_DIRECT | GO:0005576 | 11 | 0.004439 | 28.20513 |
| GOTERM_CC_DIRECT | GO:0016324 | 5  | 0.004956 | 12.82051 |
| GOTERM_CC_DIRECT | GO:0000791 | 3  | 0.006101 | 7.692308 |
| GOTERM_CC_DIRECT | GO:0031093 | 3  | 0.006875 | 7.692308 |
| GOTERM_CC_DIRECT | GO:0005901 | 3  | 0.008993 | 7.692308 |
| GOTERM_CC_DIRECT | GO:0035976 | 2  | 0.009247 | 5.128205 |
| GOTERM_CC_DIRECT | GO:0016323 | 4  | 0.009699 | 10.25641 |
| GOTERM_CC_DIRECT | GO:0045202 | 5  | 0.012408 | 12.82051 |
| GOTERM_CC_DIRECT | GO:0044294 | 2  | 0.018412 | 5.128205 |
| GOTERM_CC_DIRECT | GO:1904813 | 3  | 0.022195 | 7.692308 |
| GOTERM_CC_DIRECT | GO:0016604 | 4  | 0.024763 | 10.25641 |
| GOTERM_CC_DIRECT | GO:0030424 | 4  | 0.029102 | 10.25641 |
| GOTERM_CC_DIRECT | GO:0005770 | 3  | 0.030793 | 7.692308 |
| GOTERM_CC_DIRECT | GO:0098978 | 4  | 0.03163  | 10.25641 |
| GOTERM_CC_DIRECT | GO:0044214 | 2  | 0.032903 | 5.128205 |
| GOTERM_CC_DIRECT | GO:0043197 | 3  | 0.038806 | 7.692308 |
| GOTERM_CC_DIRECT | GO:0043025 | 4  | 0.0394   | 10.25641 |
| GOTERM_CC_DIRECT | GO:0016020 | 10 | 0.040032 | 25.64103 |
| GOTERM_MF_DIRECT | GO:0019899 | 17 | 1.23E-17 | 43.58974 |
| GOTERM_MF_DIRECT | GO:0019901 | 16 | 2.24E-14 | 41.02564 |
| GOTERM_MF_DIRECT | GO:0019903 | 10 | 1.72E-13 | 25.64103 |
| GOTERM_MF_DIRECT | GO:0042802 | 21 | 9.21E-12 | 53.84615 |
| GOTERM_MF_DIRECT | GO:0031625 | 12 | 1.39E-11 | 30.76923 |
| GOTERM_MF_DIRECT | GO:0008134 | 10 | 2.68E-10 | 25.64103 |
| GOTERM_MF_DIRECT | GO:0004672 | 10 | 4.84E-08 | 25.64103 |
| GOTERM_MF_DIRECT | GO:0005515 | 39 | 1.99E-07 | 100      |
| GOTERM_MF_DIRECT | GO:0030235 | 4  | 6.34E-07 | 10.25641 |
| GOTERM_MF_DIRECT | GO:0004713 | 6  | 3.07E-06 | 15.38462 |

|                  |            |    |          |          |
|------------------|------------|----|----------|----------|
| GOTERM_MF_DIRECT | GO:0004714 | 6  | 3.49E-06 | 15.38462 |
| GOTERM_MF_DIRECT | GO:0042826 | 6  | 6.57E-06 | 15.38462 |
| GOTERM_MF_DIRECT | GO:0003700 | 9  | 1.21E-05 | 23.07692 |
| GOTERM_MF_DIRECT | GO:0044877 | 8  | 1.66E-05 | 20.51282 |
| GOTERM_MF_DIRECT | GO:0005524 | 13 | 3.23E-05 | 33.33333 |
| GOTERM_MF_DIRECT | GO:0061629 | 6  | 3.63E-05 | 15.38462 |
| GOTERM_MF_DIRECT | GO:0051117 | 5  | 3.63E-05 | 12.82051 |
| GOTERM_MF_DIRECT | GO:0001221 | 4  | 6.11E-05 | 10.25641 |
| GOTERM_MF_DIRECT | GO:0016301 | 6  | 8.70E-05 | 15.38462 |
| GOTERM_MF_DIRECT | GO:0003690 | 5  | 8.91E-05 | 12.82051 |
| GOTERM_MF_DIRECT | GO:0001223 | 4  | 9.51E-05 | 10.25641 |
| GOTERM_MF_DIRECT | GO:0000976 | 6  | 1.11E-04 | 15.38462 |
| GOTERM_MF_DIRECT | GO:0001784 | 4  | 1.16E-04 | 10.25641 |
| GOTERM_MF_DIRECT | GO:0004674 | 7  | 1.24E-04 | 17.94872 |
| GOTERM_MF_DIRECT | GO:0003677 | 11 | 1.74E-04 | 28.20513 |
| GOTERM_MF_DIRECT | GO:0003682 | 7  | 3.19E-04 | 17.94872 |
| GOTERM_MF_DIRECT | GO:0001228 | 7  | 3.41E-04 | 17.94872 |
| GOTERM_MF_DIRECT | GO:0002039 | 4  | 3.95E-04 | 10.25641 |
| GOTERM_MF_DIRECT | GO:0004707 | 3  | 4.68E-04 | 7.692308 |
| GOTERM_MF_DIRECT | GO:0005125 | 5  | 5.92E-04 | 12.82051 |
| GOTERM_MF_DIRECT | GO:0004708 | 3  | 5.96E-04 | 7.692308 |
| GOTERM_MF_DIRECT | GO:0000979 | 3  | 7.38E-04 | 7.692308 |
| GOTERM_MF_DIRECT | GO:0008022 | 5  | 7.99E-04 | 12.82051 |
| GOTERM_MF_DIRECT | GO:0046982 | 6  | 8.54E-04 | 15.38462 |
| GOTERM_MF_DIRECT | GO:0005158 | 3  | 0.001066 | 7.692308 |
| GOTERM_MF_DIRECT | GO:0070412 | 3  | 0.001066 | 7.692308 |
| GOTERM_MF_DIRECT | GO:0043274 | 3  | 0.001158 | 7.692308 |
| GOTERM_MF_DIRECT | GO:0002020 | 4  | 0.001377 | 10.25641 |
| GOTERM_MF_DIRECT | GO:0004712 | 3  | 0.001559 | 7.692308 |
| GOTERM_MF_DIRECT | GO:0047485 | 4  | 0.001647 | 10.25641 |
| GOTERM_MF_DIRECT | GO:0019904 | 5  | 0.001897 | 12.82051 |
| GOTERM_MF_DIRECT | GO:0051059 | 3  | 0.002017 | 7.692308 |
| GOTERM_MF_DIRECT | GO:0051721 | 3  | 0.002267 | 7.692308 |
| GOTERM_MF_DIRECT | GO:0000978 | 9  | 0.002437 | 23.07692 |
| GOTERM_MF_DIRECT | GO:0097718 | 3  | 0.002531 | 7.692308 |
| GOTERM_MF_DIRECT | GO:0042169 | 3  | 0.0031   | 7.692308 |
| GOTERM_MF_DIRECT | GO:0000981 | 9  | 0.00349  | 23.07692 |
| GOTERM_MF_DIRECT | GO:0030331 | 3  | 0.003724 | 7.692308 |
| GOTERM_MF_DIRECT | GO:0004715 | 3  | 0.003889 | 7.692308 |
| GOTERM_MF_DIRECT | GO:0005178 | 4  | 0.004168 | 10.25641 |
| GOTERM_MF_DIRECT | GO:0001227 | 5  | 0.004337 | 12.82051 |
| GOTERM_MF_DIRECT | GO:0070888 | 3  | 0.004402 | 7.692308 |
| GOTERM_MF_DIRECT | GO:0008083 | 4  | 0.004539 | 10.25641 |
| GOTERM_MF_DIRECT | GO:1990782 | 3  | 0.004579 | 7.692308 |
| GOTERM_MF_DIRECT | GO:0004879 | 3  | 0.005322 | 7.692308 |
| GOTERM_MF_DIRECT | GO:0035033 | 2  | 0.006048 | 5.128205 |

|                  |            |   |          |          |
|------------------|------------|---|----------|----------|
| GOTERM_MF_DIRECT | GO:0097110 | 3 | 0.008561 | 7.692308 |
| GOTERM_MF_DIRECT | GO:0043125 | 2 | 0.010061 | 5.128205 |
| GOTERM_MF_DIRECT | GO:0042803 | 6 | 0.013752 | 15.38462 |
| GOTERM_MF_DIRECT | GO:0004725 | 3 | 0.019724 | 7.692308 |
| GOTERM_MF_DIRECT | GO:0016004 | 2 | 0.022004 | 5.128205 |
| GOTERM_MF_DIRECT | GO:0004861 | 2 | 0.023981 | 5.128205 |
| GOTERM_MF_DIRECT | GO:0043560 | 2 | 0.023981 | 5.128205 |
| GOTERM_MF_DIRECT | GO:0045296 | 4 | 0.025685 | 10.25641 |
| GOTERM_MF_DIRECT | GO:0043565 | 4 | 0.028265 | 10.25641 |
| GOTERM_MF_DIRECT | GO:0005161 | 2 | 0.029888 | 5.128205 |
| GOTERM_MF_DIRECT | GO:0030297 | 2 | 0.029888 | 5.128205 |
| GOTERM_MF_DIRECT | GO:0001216 | 2 | 0.031849 | 5.128205 |
| GOTERM_MF_DIRECT | GO:0044325 | 3 | 0.032465 | 7.692308 |
| GOTERM_MF_DIRECT | GO:0001046 | 2 | 0.03576  | 5.128205 |
| GOTERM_MF_DIRECT | GO:0005102 | 4 | 0.045397 | 10.25641 |
| GOTERM_MF_DIRECT | GO:0043548 | 2 | 0.04547  | 5.128205 |
| GOTERM_MF_DIRECT | GO:0044389 | 2 | 0.047401 | 5.128205 |
| GOTERM_MF_DIRECT | GO:0035035 | 2 | 0.049328 | 5.128205 |

---
