# Supplementary material for: Integrating Network Pharmacology and Experimental Validation to Elucidate the Mechanism of Yiqi Yangyin Decoction in Suppressing Non‐Small‐Cell Lung Cancer
Source: Hindawi journal article supplement (doi:10.1155/2023/4967544), 2023-01-01
Supplement: f7 [file 4967544.f7.pdf]

**Supplementary Table 6 The detailed pathway information of YYD against NSCLC**

| Category     | ID       | Count | %        | PValue   |
|--------------|----------|-------|----------|----------|
| KEGG_PATHWAY | hsa05200 | 31    | 79.48718 | 3.45E-29 |
| KEGG_PATHWAY | hsa05205 | 22    | 56.41026 | 1.76E-24 |
| KEGG_PATHWAY | hsa01522 | 18    | 46.15385 | 1.23E-23 |
| KEGG_PATHWAY | hsa05163 | 22    | 56.41026 | 1.32E-23 |
| KEGG_PATHWAY | hsa05167 | 21    | 53.84615 | 2.84E-23 |
| KEGG_PATHWAY | hsa05135 | 18    | 46.15385 | 5.13E-21 |
| KEGG_PATHWAY | hsa05417 | 20    | 51.28205 | 9.97E-21 |
| KEGG_PATHWAY | hsa05235 | 16    | 41.02564 | 1.35E-20 |
| KEGG_PATHWAY | hsa05166 | 20    | 51.28205 | 1.85E-20 |
| KEGG_PATHWAY | hsa05215 | 16    | 41.02564 | 5.34E-20 |
| KEGG_PATHWAY | hsa05212 | 15    | 38.46154 | 8.46E-20 |
| KEGG_PATHWAY | hsa05161 | 18    | 46.15385 | 9.80E-20 |
| KEGG_PATHWAY | hsa04625 | 16    | 41.02564 | 1.61E-19 |
| KEGG_PATHWAY | hsa05210 | 15    | 38.46154 | 5.42E-19 |
| KEGG_PATHWAY | hsa04151 | 21    | 53.84615 | 5.26E-18 |
| KEGG_PATHWAY | hsa05213 | 13    | 33.33333 | 1.16E-17 |
| KEGG_PATHWAY | hsa05219 | 12    | 30.76923 | 1.30E-17 |
| KEGG_PATHWAY | hsa05162 | 16    | 41.02564 | 1.49E-17 |
| KEGG_PATHWAY | hsa05208 | 18    | 46.15385 | 2.44E-17 |
| KEGG_PATHWAY | hsa04012 | 14    | 35.89744 | 2.85E-17 |
| KEGG_PATHWAY | hsa05224 | 16    | 41.02564 | 3.53E-17 |
| KEGG_PATHWAY | hsa05160 | 16    | 41.02564 | 9.67E-17 |
| KEGG_PATHWAY | hsa04917 | 13    | 33.33333 | 1.33E-16 |
| KEGG_PATHWAY | hsa04380 | 15    | 38.46154 | 1.83E-16 |
| KEGG_PATHWAY | hsa04933 | 14    | 35.89744 | 2.62E-16 |
| KEGG_PATHWAY | hsa05220 | 13    | 33.33333 | 3.81E-16 |
| KEGG_PATHWAY | hsa04620 | 14    | 35.89744 | 4.45E-16 |
| KEGG_PATHWAY | hsa04660 | 14    | 35.89744 | 4.45E-16 |
| KEGG_PATHWAY | hsa05418 | 15    | 38.46154 | 5.97E-16 |
| KEGG_PATHWAY | hsa01521 | 13    | 33.33333 | 6.23E-16 |
| KEGG_PATHWAY | hsa04659 | 14    | 35.89744 | 7.40E-16 |
| KEGG_PATHWAY | hsa05165 | 19    | 48.71795 | 8.69E-16 |
| KEGG_PATHWAY | hsa04668 | 14    | 35.89744 | 1.21E-15 |
| KEGG_PATHWAY | hsa04010 | 18    | 46.15385 | 2.69E-15 |
| KEGG_PATHWAY | hsa04919 | 14    | 35.89744 | 3.50E-15 |
| KEGG_PATHWAY | hsa05131 | 17    | 43.58974 | 3.76E-15 |
| KEGG_PATHWAY | hsa04510 | 16    | 41.02564 | 4.16E-15 |
| KEGG_PATHWAY | hsa05169 | 16    | 41.02564 | 4.47E-15 |
| KEGG_PATHWAY | hsa04657 | 13    | 33.33333 | 5.65E-15 |
| KEGG_PATHWAY | hsa04926 | 14    | 35.89744 | 8.14E-15 |
| KEGG_PATHWAY | hsa05207 | 16    | 41.02564 | 9.30E-15 |
| KEGG_PATHWAY | hsa05142 | 13    | 33.33333 | 1.56E-14 |
| KEGG_PATHWAY | hsa05222 | 12    | 30.76923 | 1.91E-13 |

|              |          |    |          |          |
|--------------|----------|----|----------|----------|
| KEGG_PATHWAY | hsa04068 | 13 | 33.33333 | 3.36E-13 |
| KEGG_PATHWAY | hsa04210 | 13 | 33.33333 | 5.30E-13 |
| KEGG_PATHWAY | hsa05218 | 11 | 28.20513 | 5.85E-13 |
| KEGG_PATHWAY | hsa05214 | 11 | 28.20513 | 8.95E-13 |
| KEGG_PATHWAY | hsa04066 | 12 | 30.76923 | 1.29E-12 |
| KEGG_PATHWAY | hsa05132 | 15 | 38.46154 | 2.14E-12 |
| KEGG_PATHWAY | hsa04932 | 13 | 33.33333 | 2.56E-12 |
| KEGG_PATHWAY | hsa04218 | 13 | 33.33333 | 2.76E-12 |
| KEGG_PATHWAY | hsa04722 | 12 | 30.76923 | 3.45E-12 |
| KEGG_PATHWAY | hsa05170 | 14 | 35.89744 | 5.23E-12 |
| KEGG_PATHWAY | hsa05171 | 14 | 35.89744 | 1.65E-11 |
| KEGG_PATHWAY | hsa05230 | 10 | 25.64103 | 1.99E-11 |
| KEGG_PATHWAY | hsa05223 | 10 | 25.64103 | 2.59E-11 |
| KEGG_PATHWAY | hsa05226 | 12 | 30.76923 | 4.11E-11 |
| KEGG_PATHWAY | hsa05133 | 10 | 25.64103 | 4.27E-11 |
| KEGG_PATHWAY | hsa05130 | 13 | 33.33333 | 4.41E-11 |
| KEGG_PATHWAY | hsa04935 | 11 | 28.20513 | 1.00E-10 |
| KEGG_PATHWAY | hsa04630 | 12 | 30.76923 | 1.02E-10 |
| KEGG_PATHWAY | hsa05225 | 12 | 30.76923 | 1.52E-10 |
| KEGG_PATHWAY | hsa04658 | 10 | 25.64103 | 2.47E-10 |
| KEGG_PATHWAY | hsa04621 | 12 | 30.76923 | 4.05E-10 |
| KEGG_PATHWAY | hsa04915 | 11 | 28.20513 | 4.38E-10 |
| KEGG_PATHWAY | hsa05231 | 10 | 25.64103 | 4.40E-10 |
| KEGG_PATHWAY | hsa04936 | 11 | 28.20513 | 5.81E-10 |
| KEGG_PATHWAY | hsa05211 | 9  | 23.07692 | 6.91E-10 |
| KEGG_PATHWAY | hsa05120 | 9  | 23.07692 | 7.78E-10 |
| KEGG_PATHWAY | hsa04931 | 10 | 25.64103 | 1.06E-09 |
| KEGG_PATHWAY | hsa01524 | 9  | 23.07692 | 1.10E-09 |
| KEGG_PATHWAY | hsa05203 | 12 | 30.76923 | 1.22E-09 |
| KEGG_PATHWAY | hsa05145 | 10 | 25.64103 | 1.47E-09 |
| KEGG_PATHWAY | hsa05140 | 9  | 23.07692 | 1.69E-09 |
| KEGG_PATHWAY | hsa04071 | 10 | 25.64103 | 2.52E-09 |
| KEGG_PATHWAY | hsa04662 | 9  | 23.07692 | 2.82E-09 |
| KEGG_PATHWAY | hsa05164 | 11 | 28.20513 | 3.59E-09 |
| KEGG_PATHWAY | hsa04014 | 12 | 30.76923 | 5.45E-09 |
| KEGG_PATHWAY | hsa05152 | 11 | 28.20513 | 5.91E-09 |
| KEGG_PATHWAY | hsa04370 | 8  | 20.51282 | 7.62E-09 |
| KEGG_PATHWAY | hsa05206 | 13 | 33.33333 | 8.20E-09 |
| KEGG_PATHWAY | hsa04062 | 11 | 28.20513 | 1.10E-08 |
| KEGG_PATHWAY | hsa05216 | 7  | 17.94872 | 1.42E-08 |
| KEGG_PATHWAY | hsa04912 | 8  | 20.51282 | 1.89E-07 |
| KEGG_PATHWAY | hsa04140 | 9  | 23.07692 | 2.06E-07 |
| KEGG_PATHWAY | hsa05020 | 11 | 28.20513 | 3.09E-07 |
| KEGG_PATHWAY | hsa04914 | 8  | 20.51282 | 3.57E-07 |
| KEGG_PATHWAY | hsa05146 | 8  | 20.51282 | 3.57E-07 |
| KEGG_PATHWAY | hsa04921 | 9  | 23.07692 | 4.07E-07 |

|              |          |    |          |           |
|--------------|----------|----|----------|-----------|
| KEGG_PATHWAY | hsa05321 | 7  | 17.94872 | 4.58E-07  |
| KEGG_PATHWAY | hsa05221 | 7  | 17.94872 | 5.50E-07  |
| KEGG_PATHWAY | hsa04024 | 10 | 25.64103 | 5.51E-07  |
| KEGG_PATHWAY | hsa04664 | 7  | 17.94872 | 6.01E-07  |
| KEGG_PATHWAY | hsa04137 | 7  | 17.94872 | 8.46E-07  |
| KEGG_PATHWAY | hsa04115 | 7  | 17.94872 | 9.19E-07  |
| KEGG_PATHWAY | hsa05168 | 13 | 33.33333 | 1.39E-06  |
| KEGG_PATHWAY | hsa05202 | 9  | 23.07692 | 2.26E-06  |
| KEGG_PATHWAY | hsa04015 | 9  | 23.07692 | 4.25E-06  |
| KEGG_PATHWAY | hsa05134 | 6  | 15.38462 | 5.87E-06  |
| KEGG_PATHWAY | hsa05010 | 11 | 28.20513 | 6.88E-06  |
| KEGG_PATHWAY | hsa04920 | 6  | 15.38462 | 1.51E-05  |
| KEGG_PATHWAY | hsa04650 | 7  | 17.94872 | 2.22E-05  |
| KEGG_PATHWAY | hsa04910 | 7  | 17.94872 | 3.57E-05  |
| KEGG_PATHWAY | hsa05022 | 11 | 28.20513 | 4.48E-05  |
| KEGG_PATHWAY | hsa04550 | 7  | 17.94872 | 4.55E-05  |
| KEGG_PATHWAY | hsa04540 | 6  | 15.38462 | 4.94E-05  |
| KEGG_PATHWAY | hsa04211 | 6  | 15.38462 | 5.22E-05  |
| KEGG_PATHWAY | hsa04072 | 7  | 17.94872 | 5.52E-05  |
| KEGG_PATHWAY | hsa05323 | 6  | 15.38462 | 6.45E-05  |
| KEGG_PATHWAY | hsa04934 | 7  | 17.94872 | 7.14E-05  |
| KEGG_PATHWAY | hsa04150 | 7  | 17.94872 | 7.40E-05  |
| KEGG_PATHWAY | hsa04750 | 6  | 15.38462 | 8.29E-05  |
| KEGG_PATHWAY | hsa04064 | 6  | 15.38462 | 1.10E-04  |
| KEGG_PATHWAY | hsa04310 | 7  | 17.94872 | 1.19E-04  |
| KEGG_PATHWAY | hsa04928 | 6  | 15.38462 | 1.20E-04  |
| KEGG_PATHWAY | hsa04725 | 6  | 15.38462 | 1.63E-04  |
| KEGG_PATHWAY | hsa04613 | 7  | 17.94872 | 2.19E-04  |
| KEGG_PATHWAY | hsa04611 | 6  | 15.38462 | 2.52E-04  |
| KEGG_PATHWAY | hsa04110 | 6  | 15.38462 | 2.71E-04  |
| KEGG_PATHWAY | hsa04622 | 5  | 12.82051 | 2.95E-04  |
| KEGG_PATHWAY | hsa05415 | 7  | 17.94872 | 3.13E-04  |
| KEGG_PATHWAY | hsa04728 | 6  | 15.38462 | 3.36E-04  |
| KEGG_PATHWAY | hsa01523 | 4  | 10.25641 | 3.47E-04  |
| KEGG_PATHWAY | hsa04810 | 7  | 17.94872 | 4.59E-04  |
| KEGG_PATHWAY | hsa05332 | 4  | 10.25641 | 9.45E-04  |
| KEGG_PATHWAY | hsa04530 | 6  | 15.38462 | 0.0010388 |
| KEGG_PATHWAY | hsa04930 | 4  | 10.25641 | 0.0012337 |
| KEGG_PATHWAY | hsa04360 | 6  | 15.38462 | 0.0014463 |
| KEGG_PATHWAY | hsa04623 | 4  | 10.25641 | 0.0030563 |
| KEGG_PATHWAY | hsa04929 | 4  | 10.25641 | 0.0031964 |
| KEGG_PATHWAY | hsa04371 | 5  | 12.82051 | 0.0038049 |
| KEGG_PATHWAY | hsa04520 | 4  | 10.25641 | 0.0042877 |
| KEGG_PATHWAY | hsa05100 | 4  | 10.25641 | 0.0053834 |
| KEGG_PATHWAY | hsa04217 | 5  | 12.82051 | 0.0061297 |
| KEGG_PATHWAY | hsa04215 | 3  | 7.692308 | 0.009601  |

|              |          |   |          |           |
|--------------|----------|---|----------|-----------|
| KEGG_PATHWAY | hsa04666 | 4 | 10.25641 | 0.0101799 |
| KEGG_PATHWAY | hsa04916 | 4 | 10.25641 | 0.0113606 |
| KEGG_PATHWAY | hsa05143 | 3 | 7.692308 | 0.0127048 |
| KEGG_PATHWAY | hsa04670 | 4 | 10.25641 | 0.0157285 |
| KEGG_PATHWAY | hsa04726 | 4 | 10.25641 | 0.0160985 |
| KEGG_PATHWAY | hsa04940 | 3 | 7.692308 | 0.0169271 |
| KEGG_PATHWAY | hsa04152 | 4 | 10.25641 | 0.0180226 |
| KEGG_PATHWAY | hsa05030 | 3 | 7.692308 | 0.0216628 |
| KEGG_PATHWAY | hsa05144 | 3 | 7.692308 | 0.0224999 |
| KEGG_PATHWAY | hsa04114 | 4 | 10.25641 | 0.0226911 |
| KEGG_PATHWAY | hsa04020 | 5 | 12.82051 | 0.0246576 |
| KEGG_PATHWAY | hsa04340 | 3 | 7.692308 | 0.0277969 |
| KEGG_PATHWAY | hsa04923 | 3 | 7.692308 | 0.0277969 |
| KEGG_PATHWAY | hsa04723 | 4 | 10.25641 | 0.0310891 |
| KEGG_PATHWAY | hsa05416 | 3 | 7.692308 | 0.0315798 |
| KEGG_PATHWAY | hsa04261 | 4 | 10.25641 | 0.0321713 |
| KEGG_PATHWAY | hsa04213 | 3 | 7.692308 | 0.0335437 |
| KEGG_PATHWAY | hsa05012 | 5 | 12.82051 | 0.034238  |
| KEGG_PATHWAY | hsa05217 | 3 | 7.692308 | 0.0345433 |
| KEGG_PATHWAY | hsa04720 | 3 | 7.692308 | 0.0386564 |
| KEGG_PATHWAY | hsa05031 | 3 | 7.692308 | 0.0407802 |

---
