# Supplementary material for: Integrating Network Pharmacology and Experimental Validation to Elucidate the Mechanism of Yiqi Yangyin Decoction in Suppressing Non‐Small‐Cell Lung Cancer
Source: Hindawi journal article supplement (doi:10.1155/2023/4967544), 2023-01-01
Supplement: f8 [file 4967544.f8.pdf]

**Supplementary Table 7 Cluster analysis for PPI network**

| Cluster | Score | Nodes | Edges | Genes                                                                                                                                                                                                                                                                                                                      |
|---------|-------|-------|-------|----------------------------------------------------------------------------------------------------------------------------------------------------------------------------------------------------------------------------------------------------------------------------------------------------------------------------|
| 1       | 14    | 50    | 343   | HSP90AA1, CDK4, AKT1, PTK2, AURKA, IL2, CCND1, MMP3, IL1B, ERBB3, CXCL10, E2F2, FOS, CXCL8, ESR2, E2F1, MTOR, PTGS2, JUN, RUNX2, PTEN, CDKN1A, CDKN2A, MYC, MPO, CCL2, IFNG, IL4, ICAM1, PTPRC, CAV1, PCNA, ALB, EGFR, CDK5, CRP, IL6, CDK6, TNF, IGF1R, MAPK14, CHEK1, TYMS, ERBB2, TOP2A, AURKB, BIRC5, PLK1, MDM2, IL1A |
| 2       | 7.935 | 32    | 123   | ESR1, IKBKB, HIF1A, MET, MAPK1, NFKBIA, MMP1, CCNB1, IL10, PLG, TP53, CCNA2, BAX, PGR, ANXA5, HSPA8, CYCS, TERT, GSK3B, CTNNA1, CASP9, CDK1, EGF, CASP8, SRC, ERBB4, PTPN1, CDK2, MMP9, RB1, BCL2, STAT1                                                                                                                   |
| 3       | 5.923 | 27    | 77    | PIK3R1, VEGFA, MAPK8, BCL2L1, CASP3, HSPA5, NOS2, MAPK10, PPARG, LCK, PTPN11, HDAC2, APP, PDPK1, ADAM17, RAC1, RASA1, PRKCB, MCL1, CHUK, CD40LG, KDR, NR3C1, CASP1, NFE2L2, AR, RELA                                                                                                                                       |
| 4       | 5     | 5     | 10    | CYP3A4, CYP1A2, CYP2C9, GSTM1, GSTP1                                                                                                                                                                                                                                                                                       |
| 5       | 4     | 4     | 6     | PTGS1, PLA2G4A, PLA2G2A, ALOX5                                                                                                                                                                                                                                                                                             |
| 6       | 4     | 5     | 8     | CYP17A1, CYP1A1, CYP19A1, HSD17B1, CYP1B1                                                                                                                                                                                                                                                                                  |
| 7       | 3.5   | 5     | 7     | PRKCA, MAP2K1, MAP2K4, BRAF, RAF1                                                                                                                                                                                                                                                                                          |
